# Supplementary material for: A New Chicken Genome Assembly Provides Insight into Avian Genome Structure
Source: PubMed Central journal article supplement (PMC5217101; doi:10.1534/g3.116.035923), 2016-11-14

Gallus\_gallus-4.0 vs Gallus\_gallus-5.0

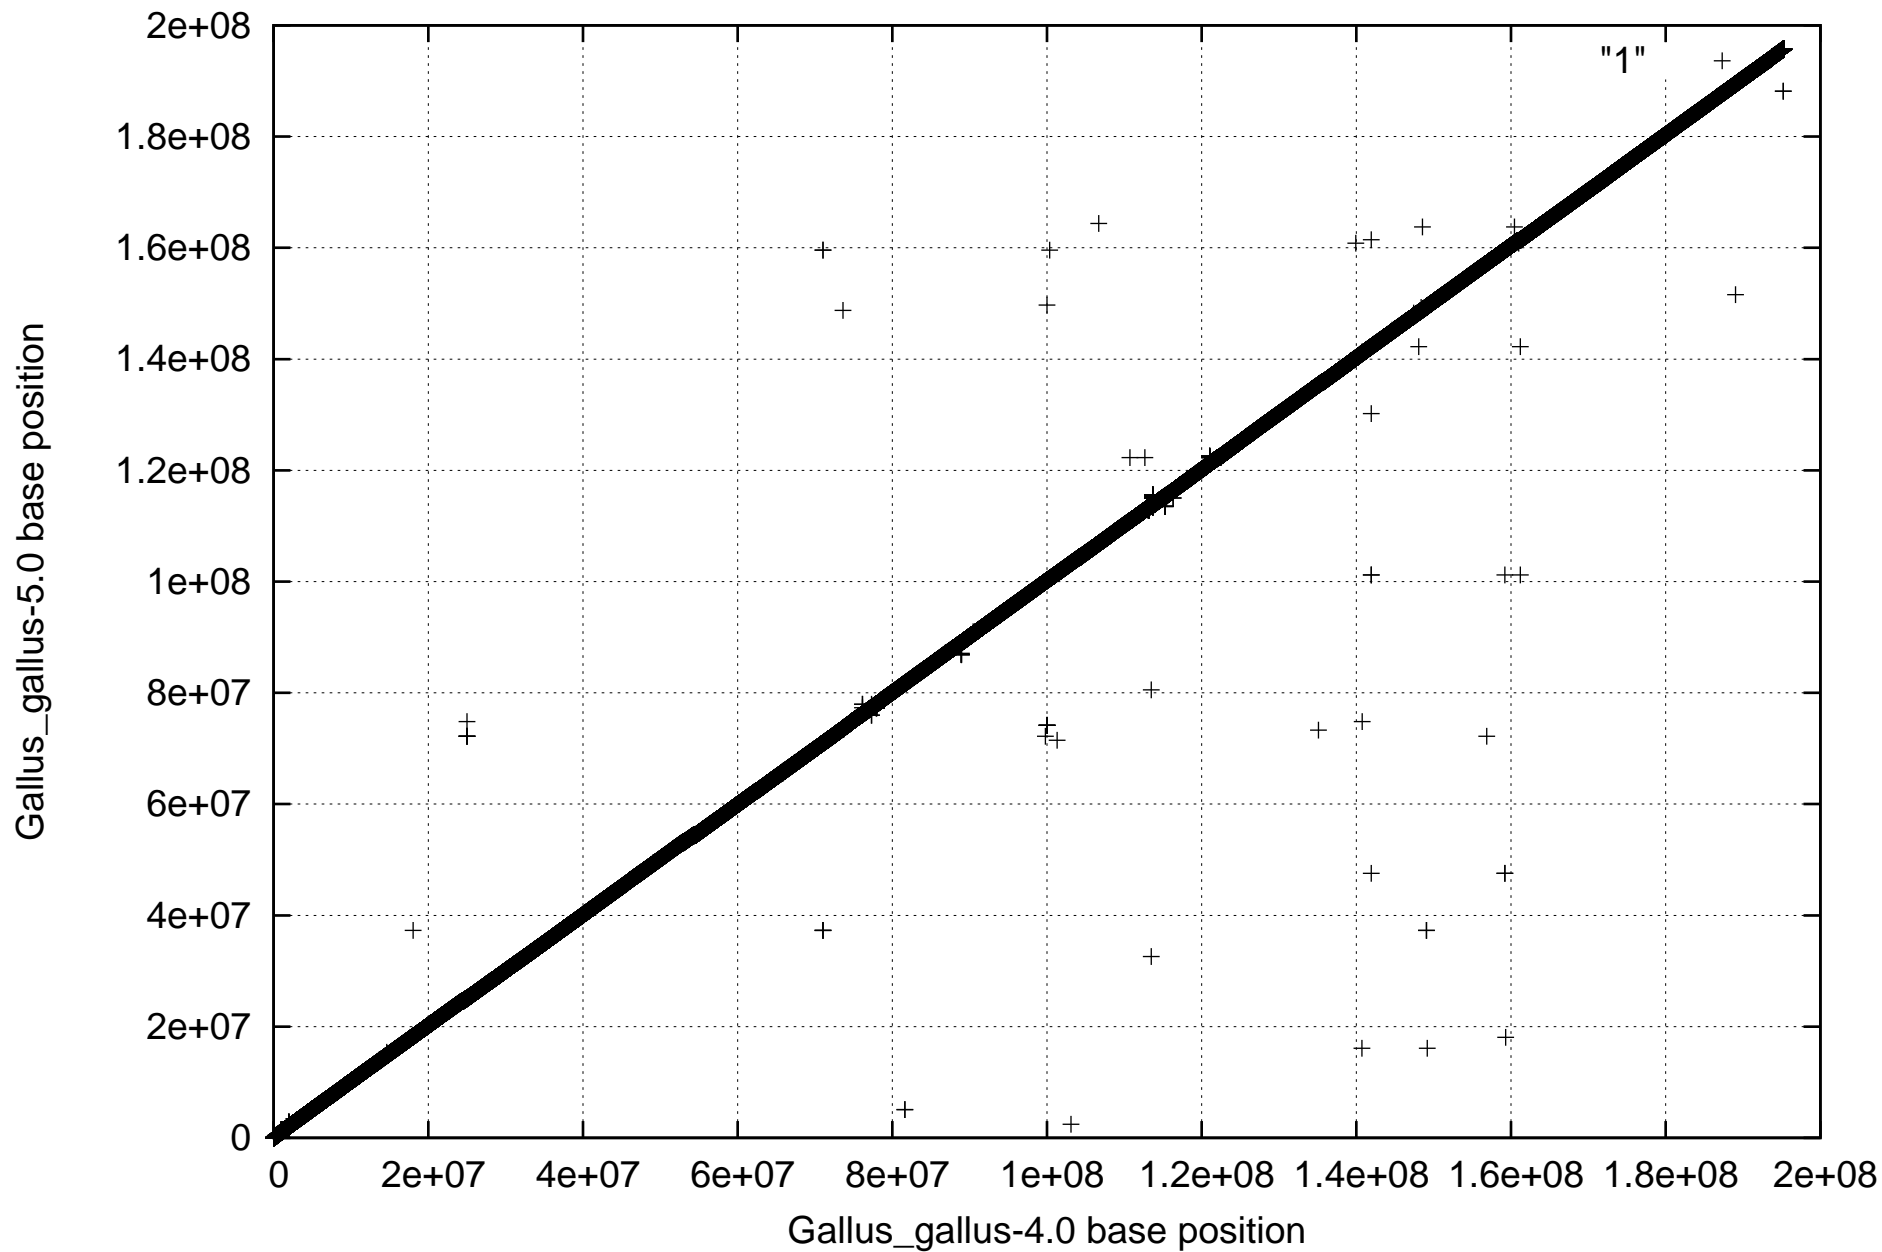

Gallus\_gallus-4.0 vs Gallus\_gallus-5.0

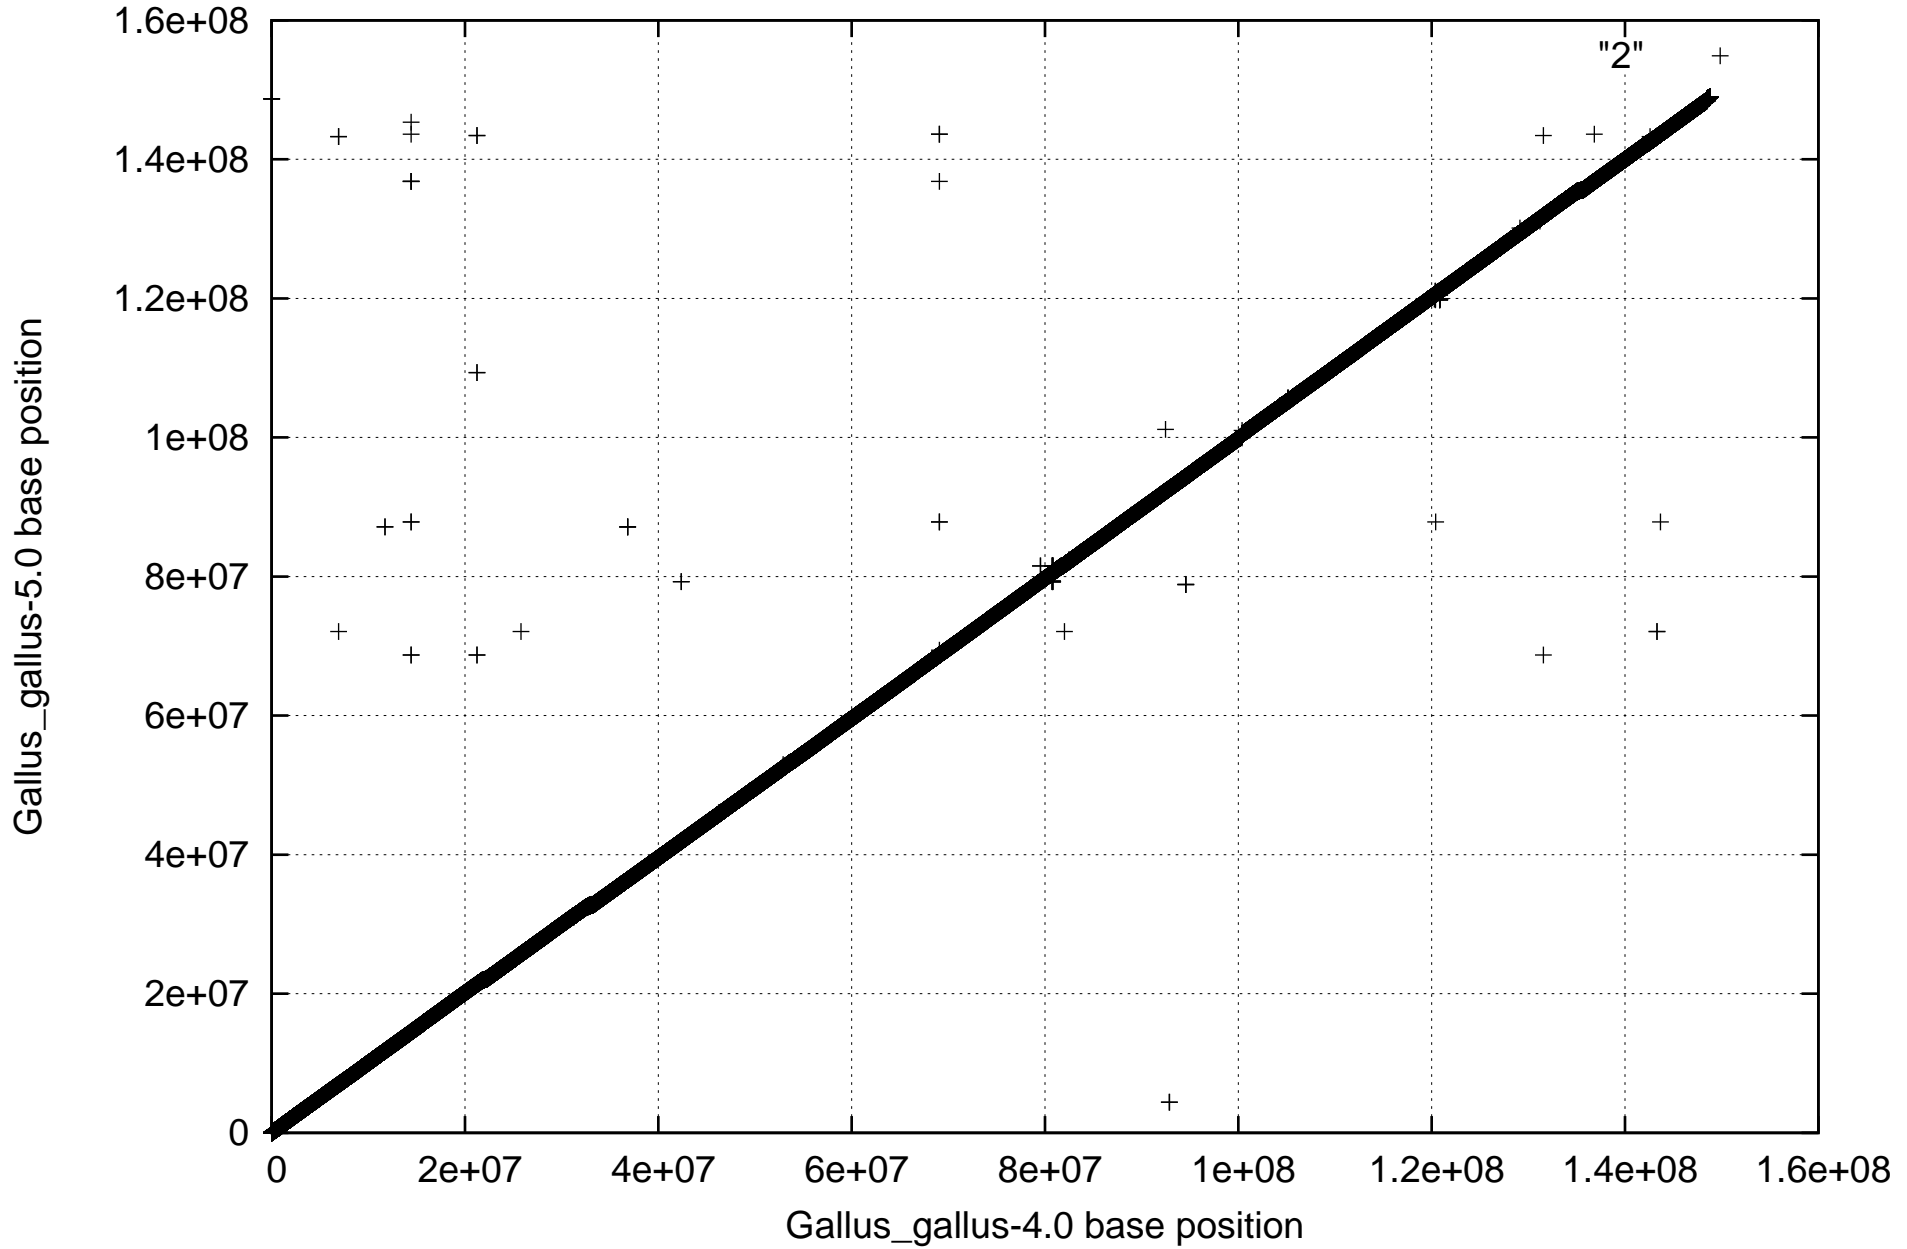

Gallus\_gallus-4.0 vs Gallus\_gallus-5.0

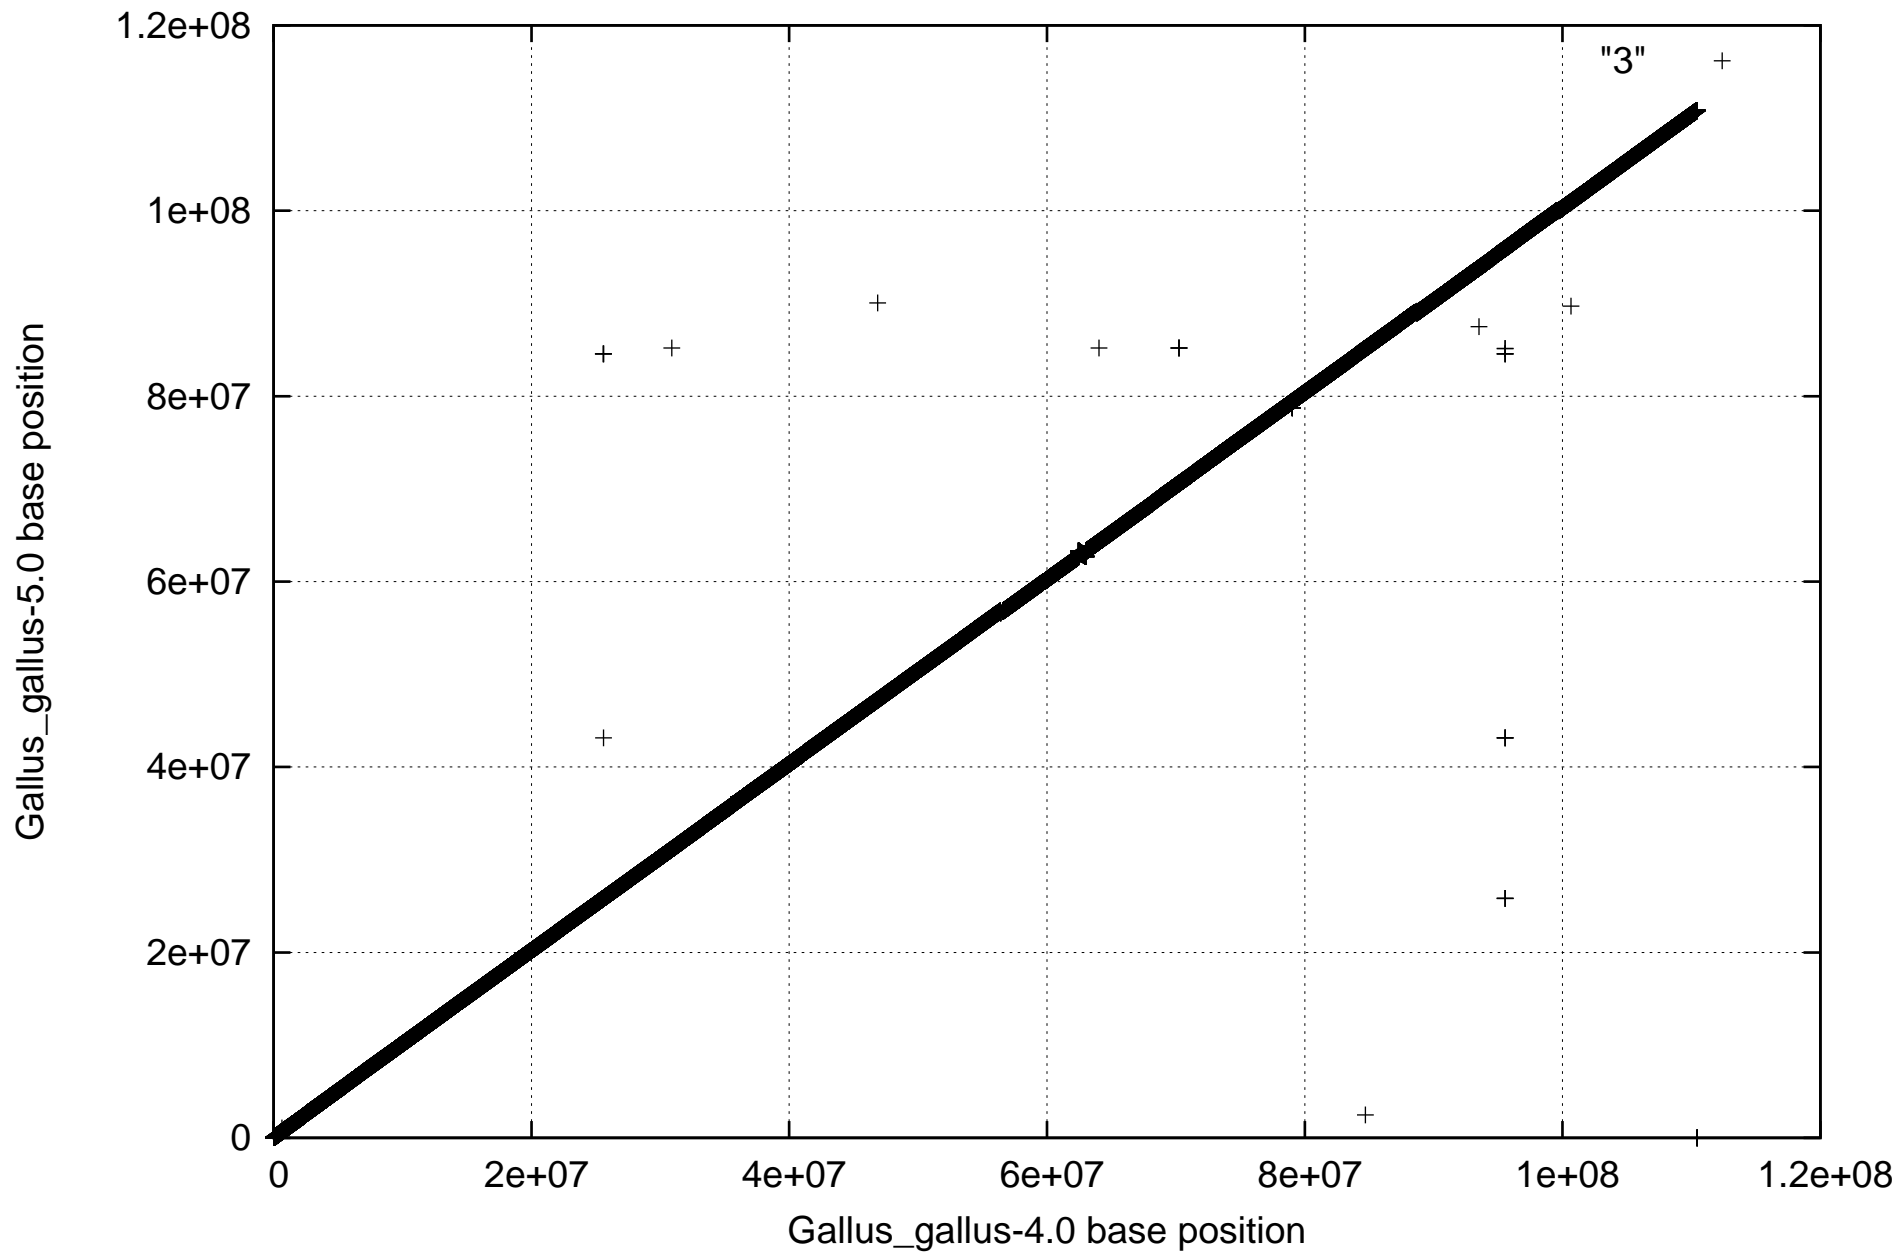

Gallus\_gallus-4.0 vs Gallus\_gallus-5.0

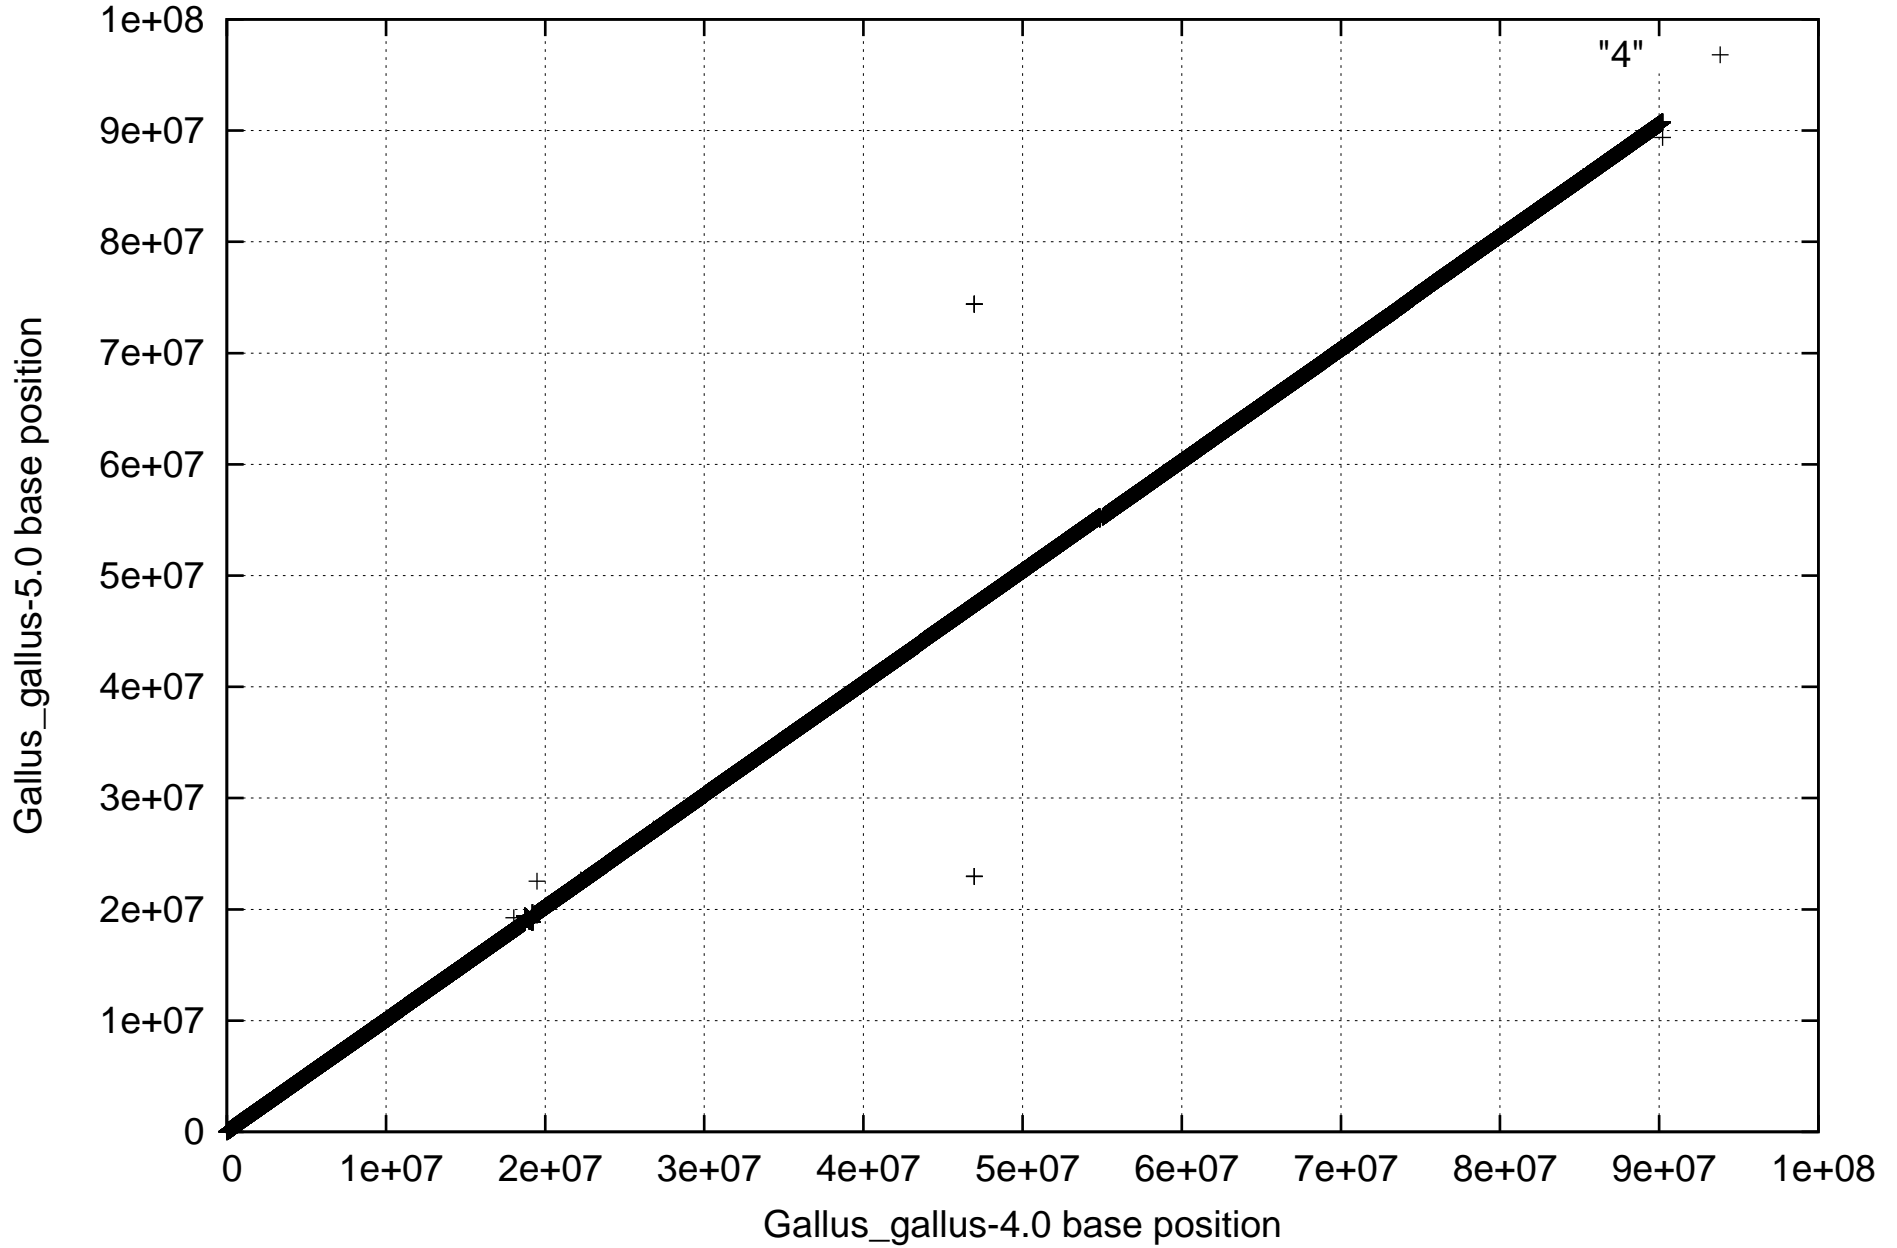

Gallus\_gallus-4.0 vs Gallus\_gallus-5.0

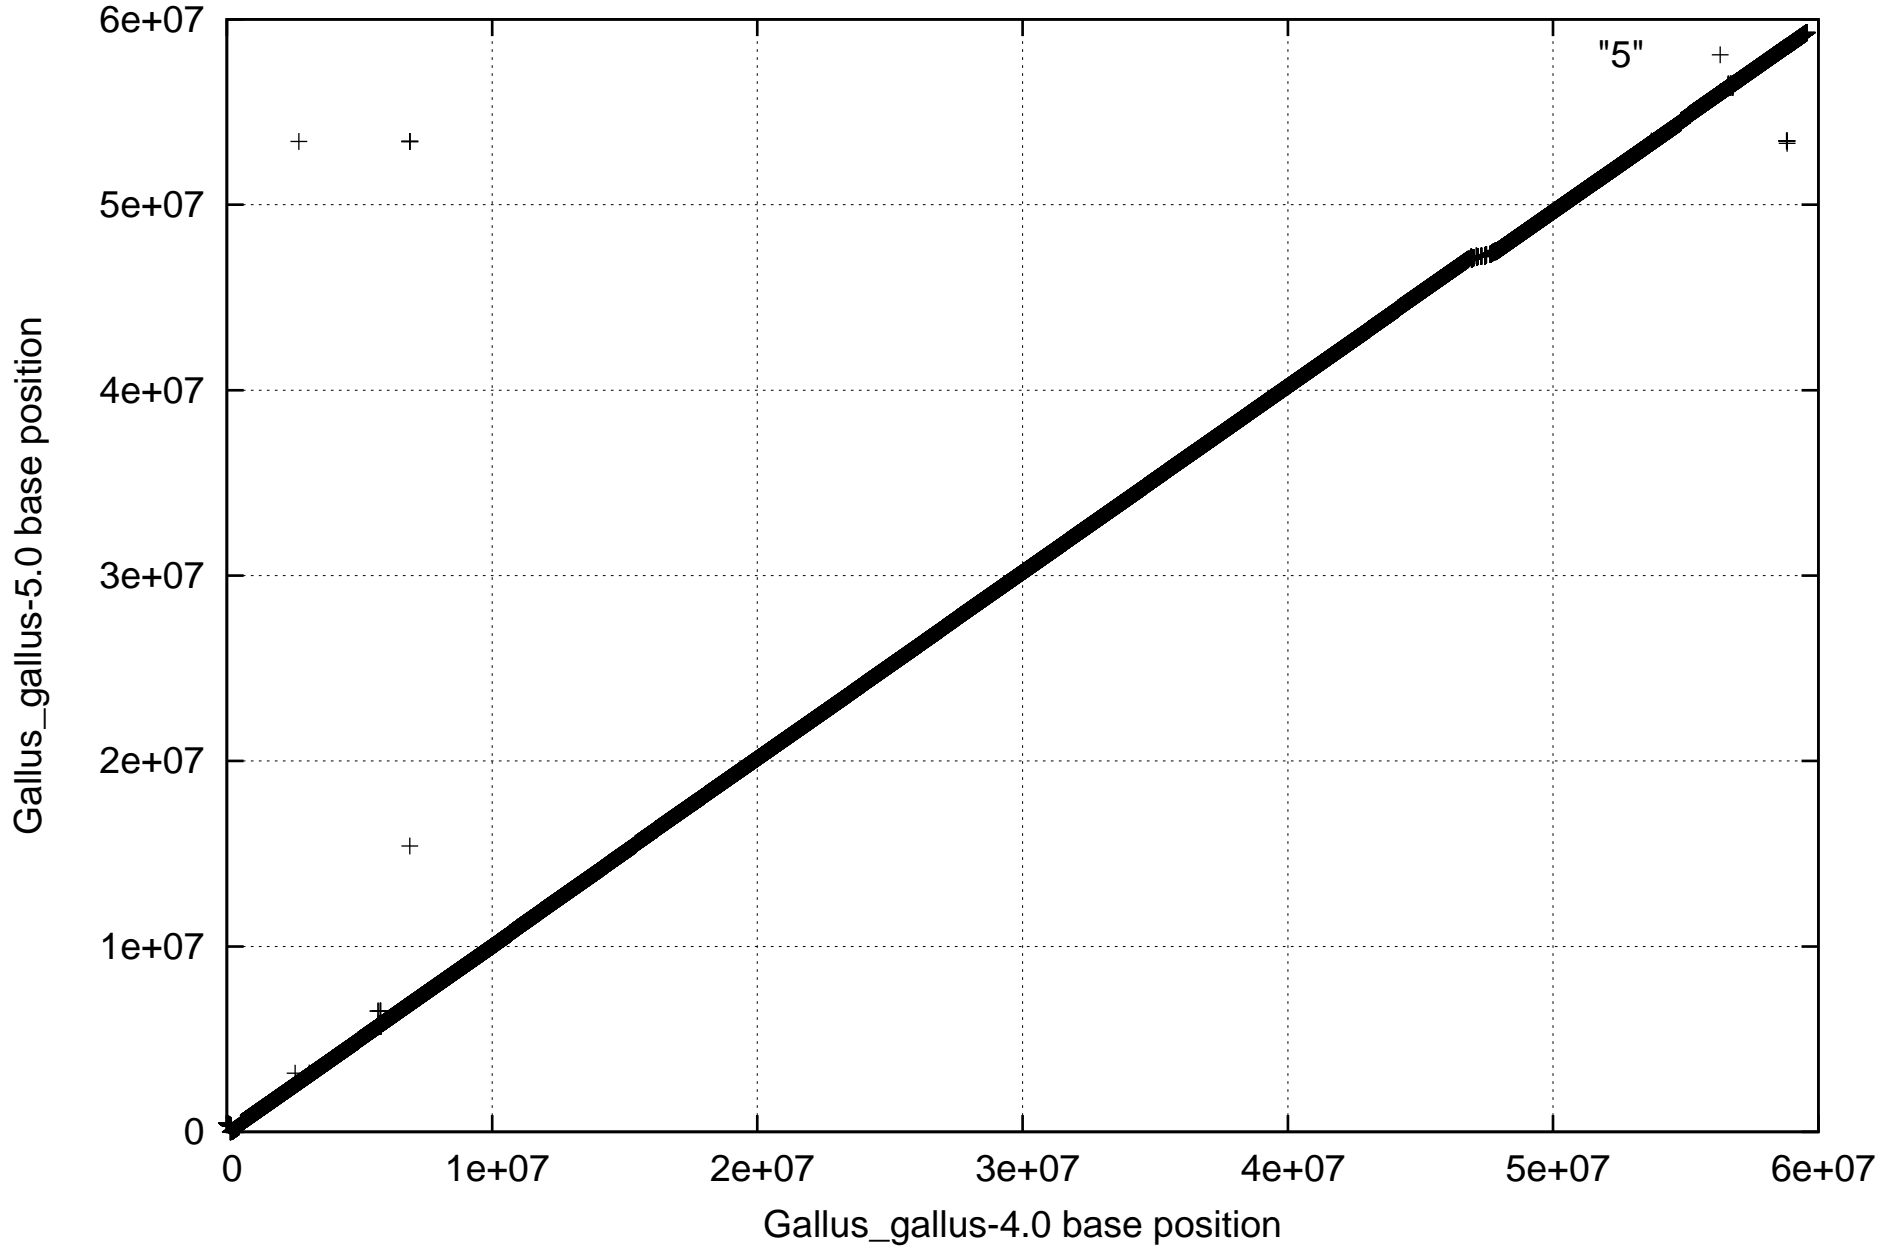

Gallus\_gallus-4.0 vs Gallus\_gallus-5.0

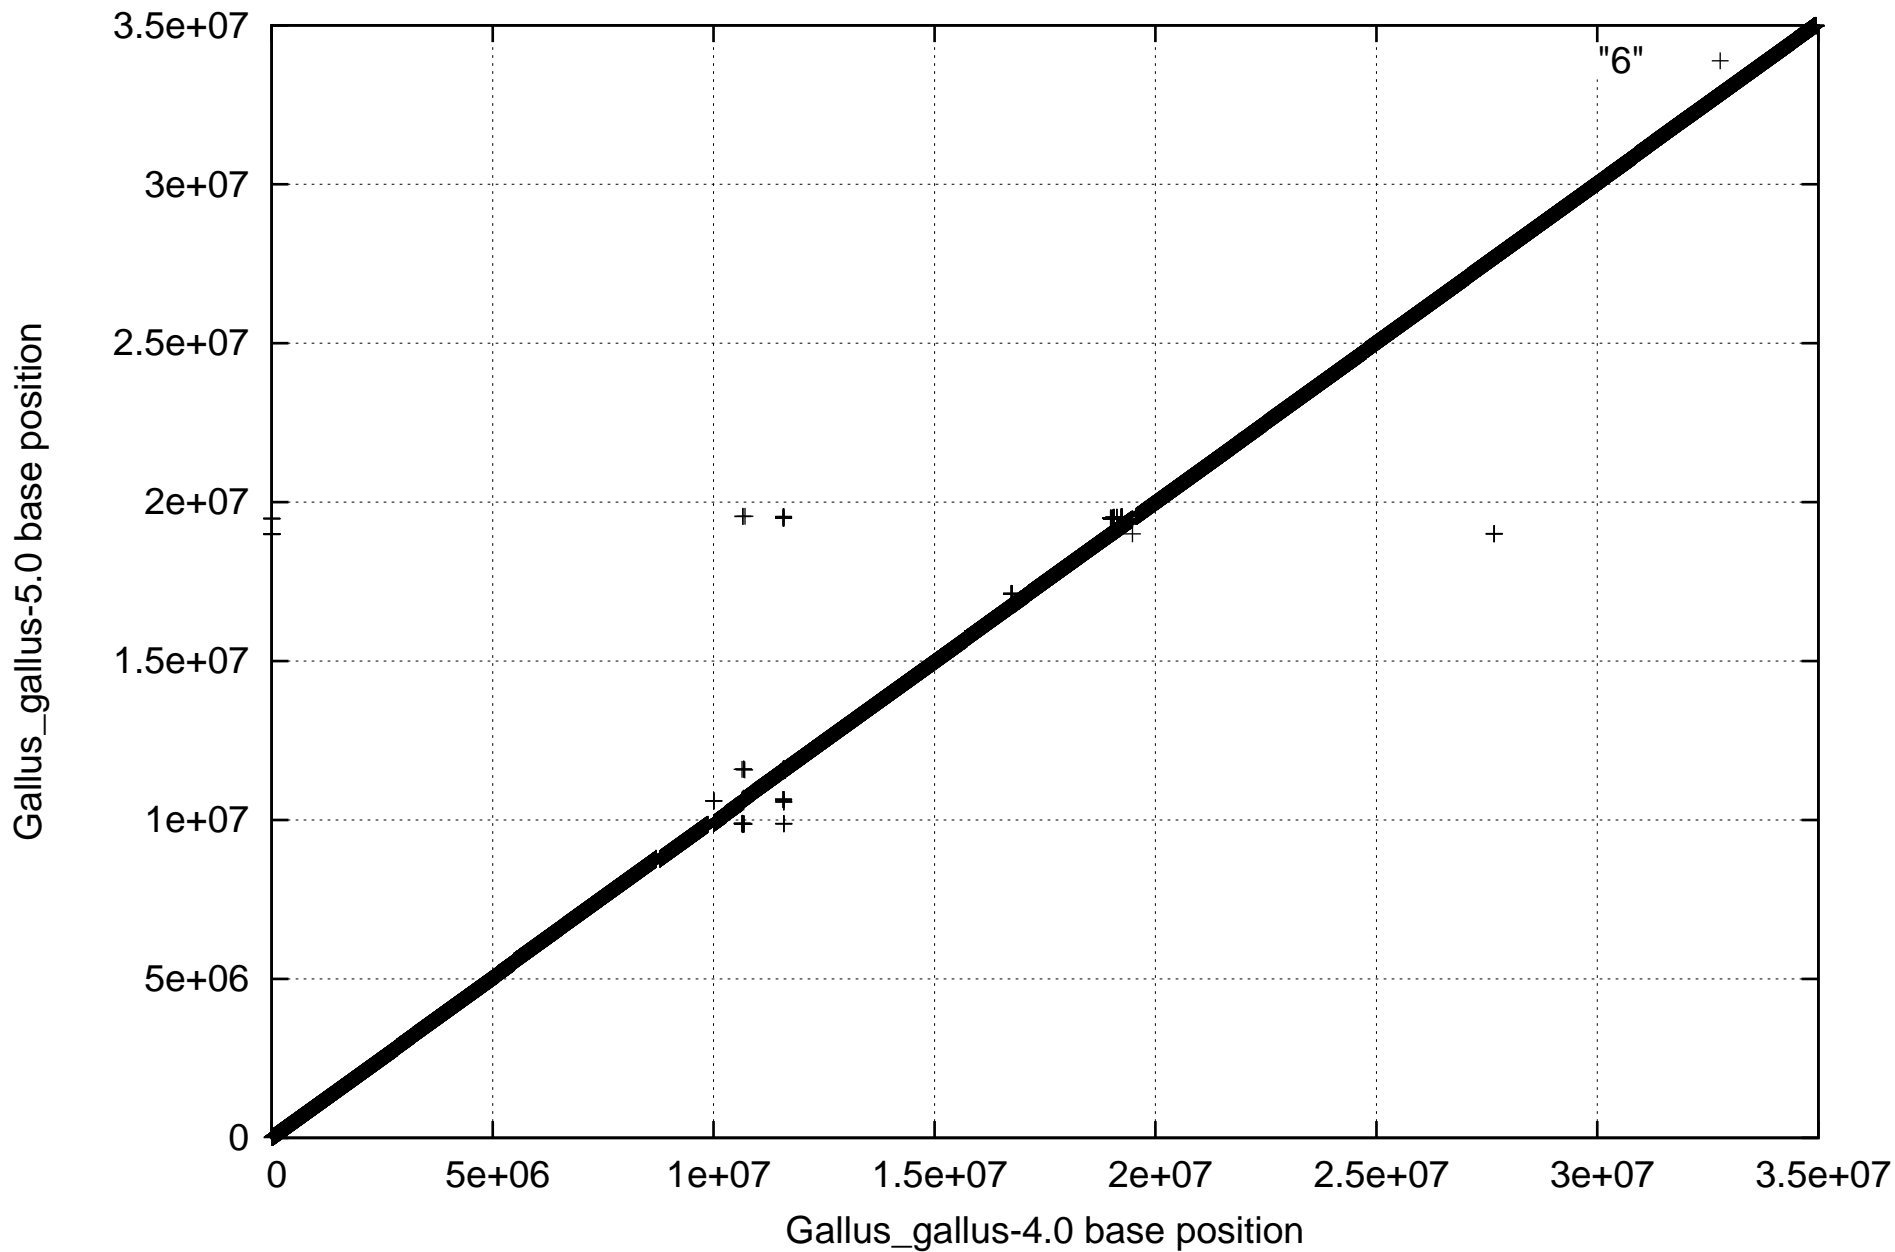

Gallus\_gallus-4.0 vs Gallus\_gallus-5.0

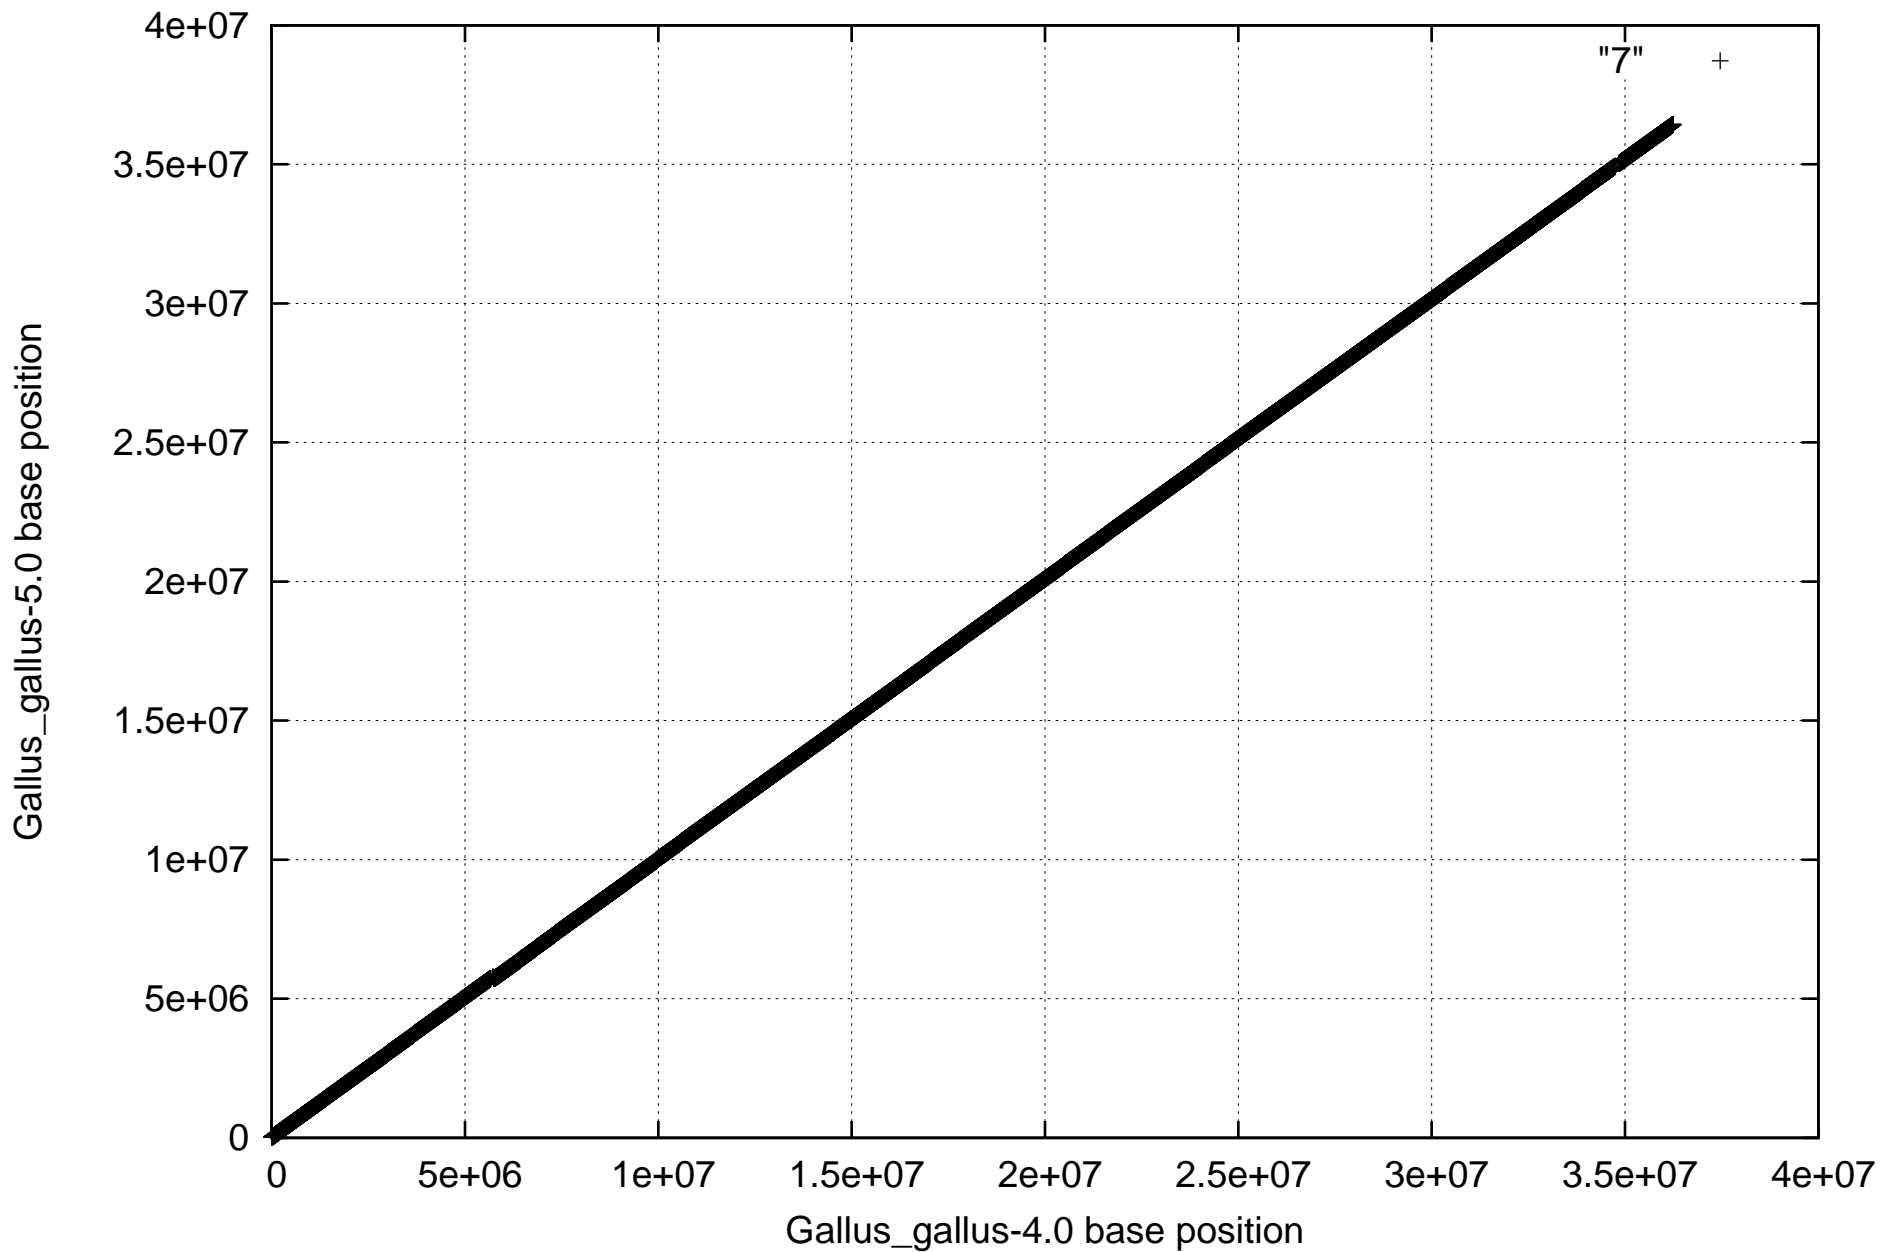

Gallus\_gallus-4.0 vs Gallus\_gallus-5.0

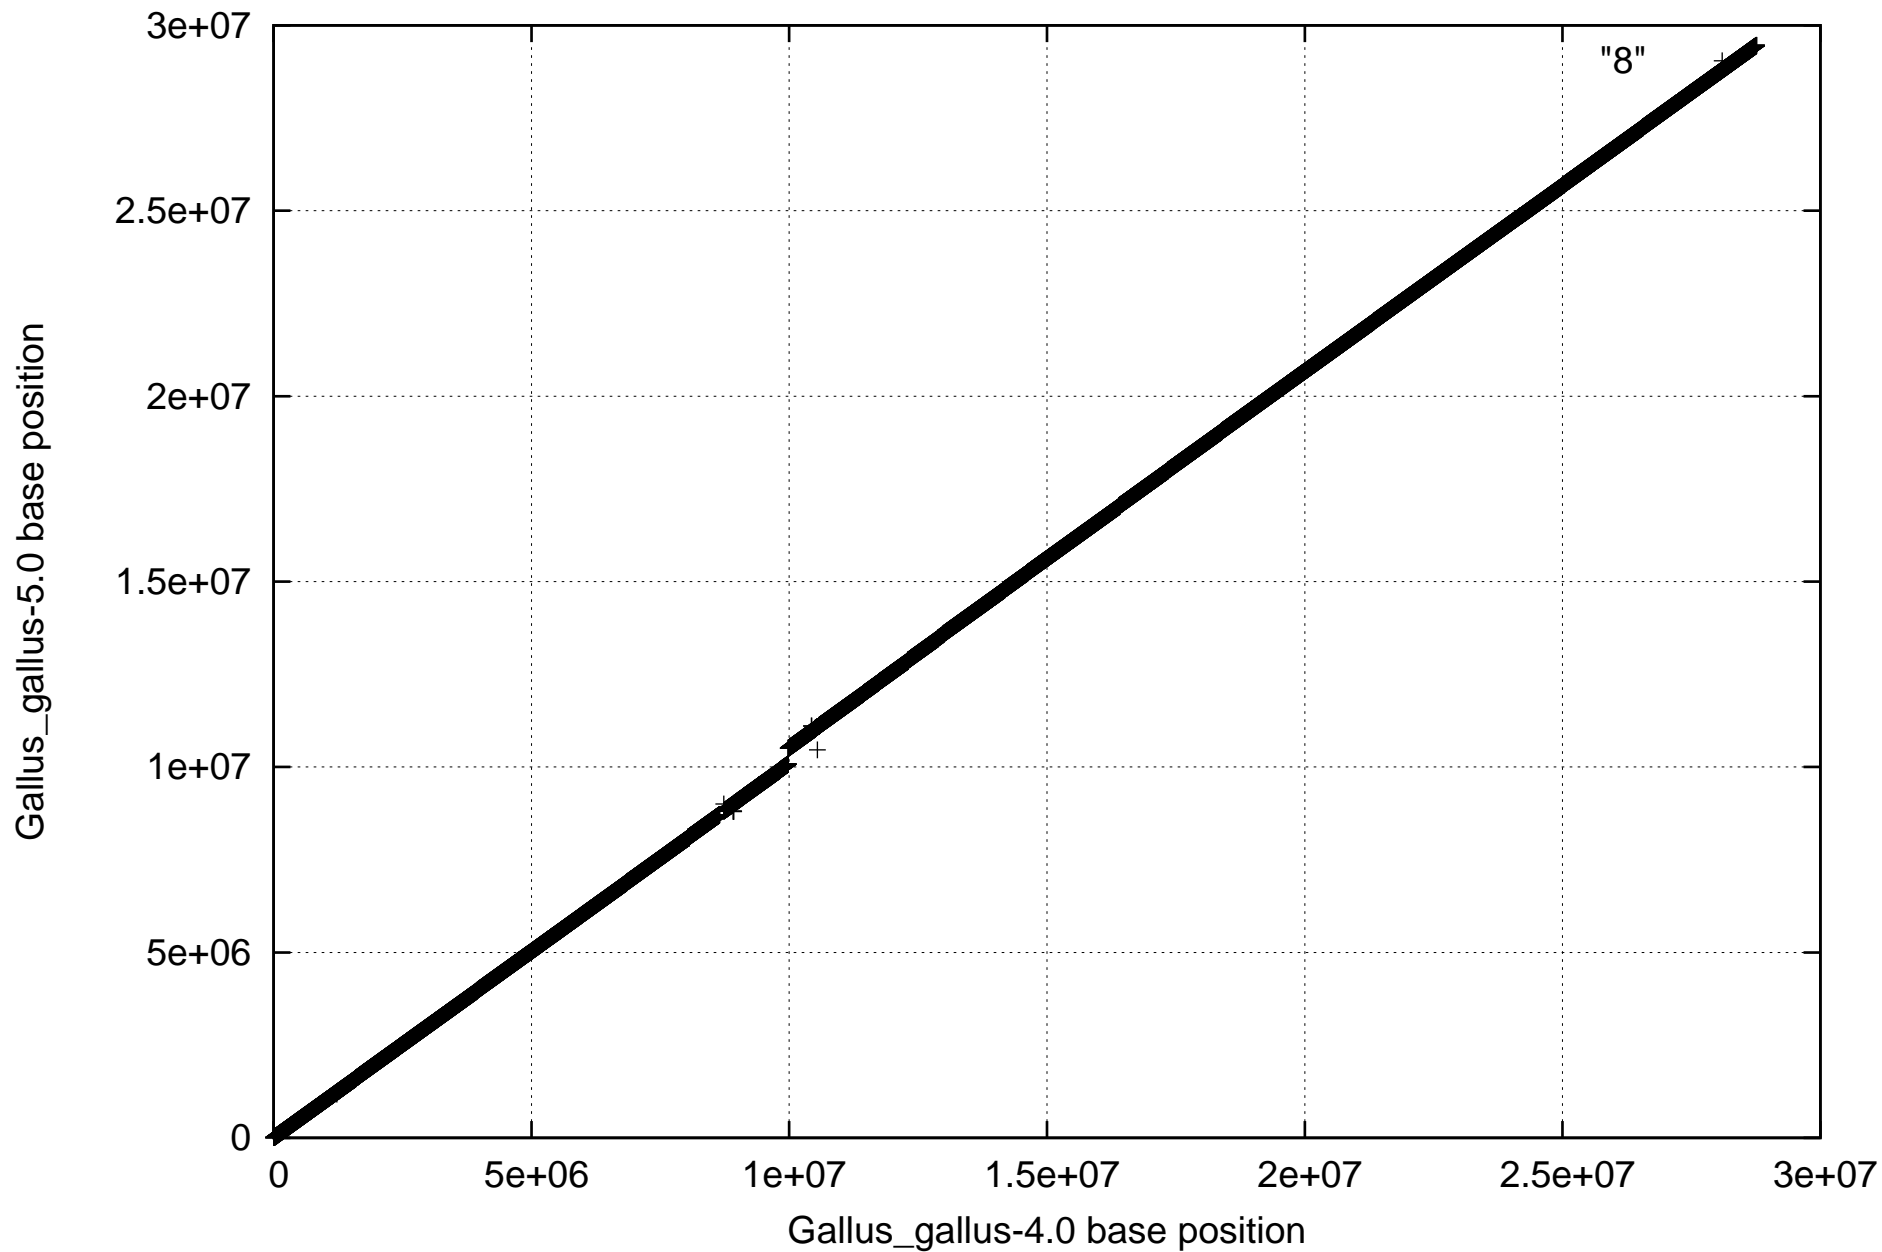



Gallus\_gallus-4.0 vs Gallus\_gallus-5.0

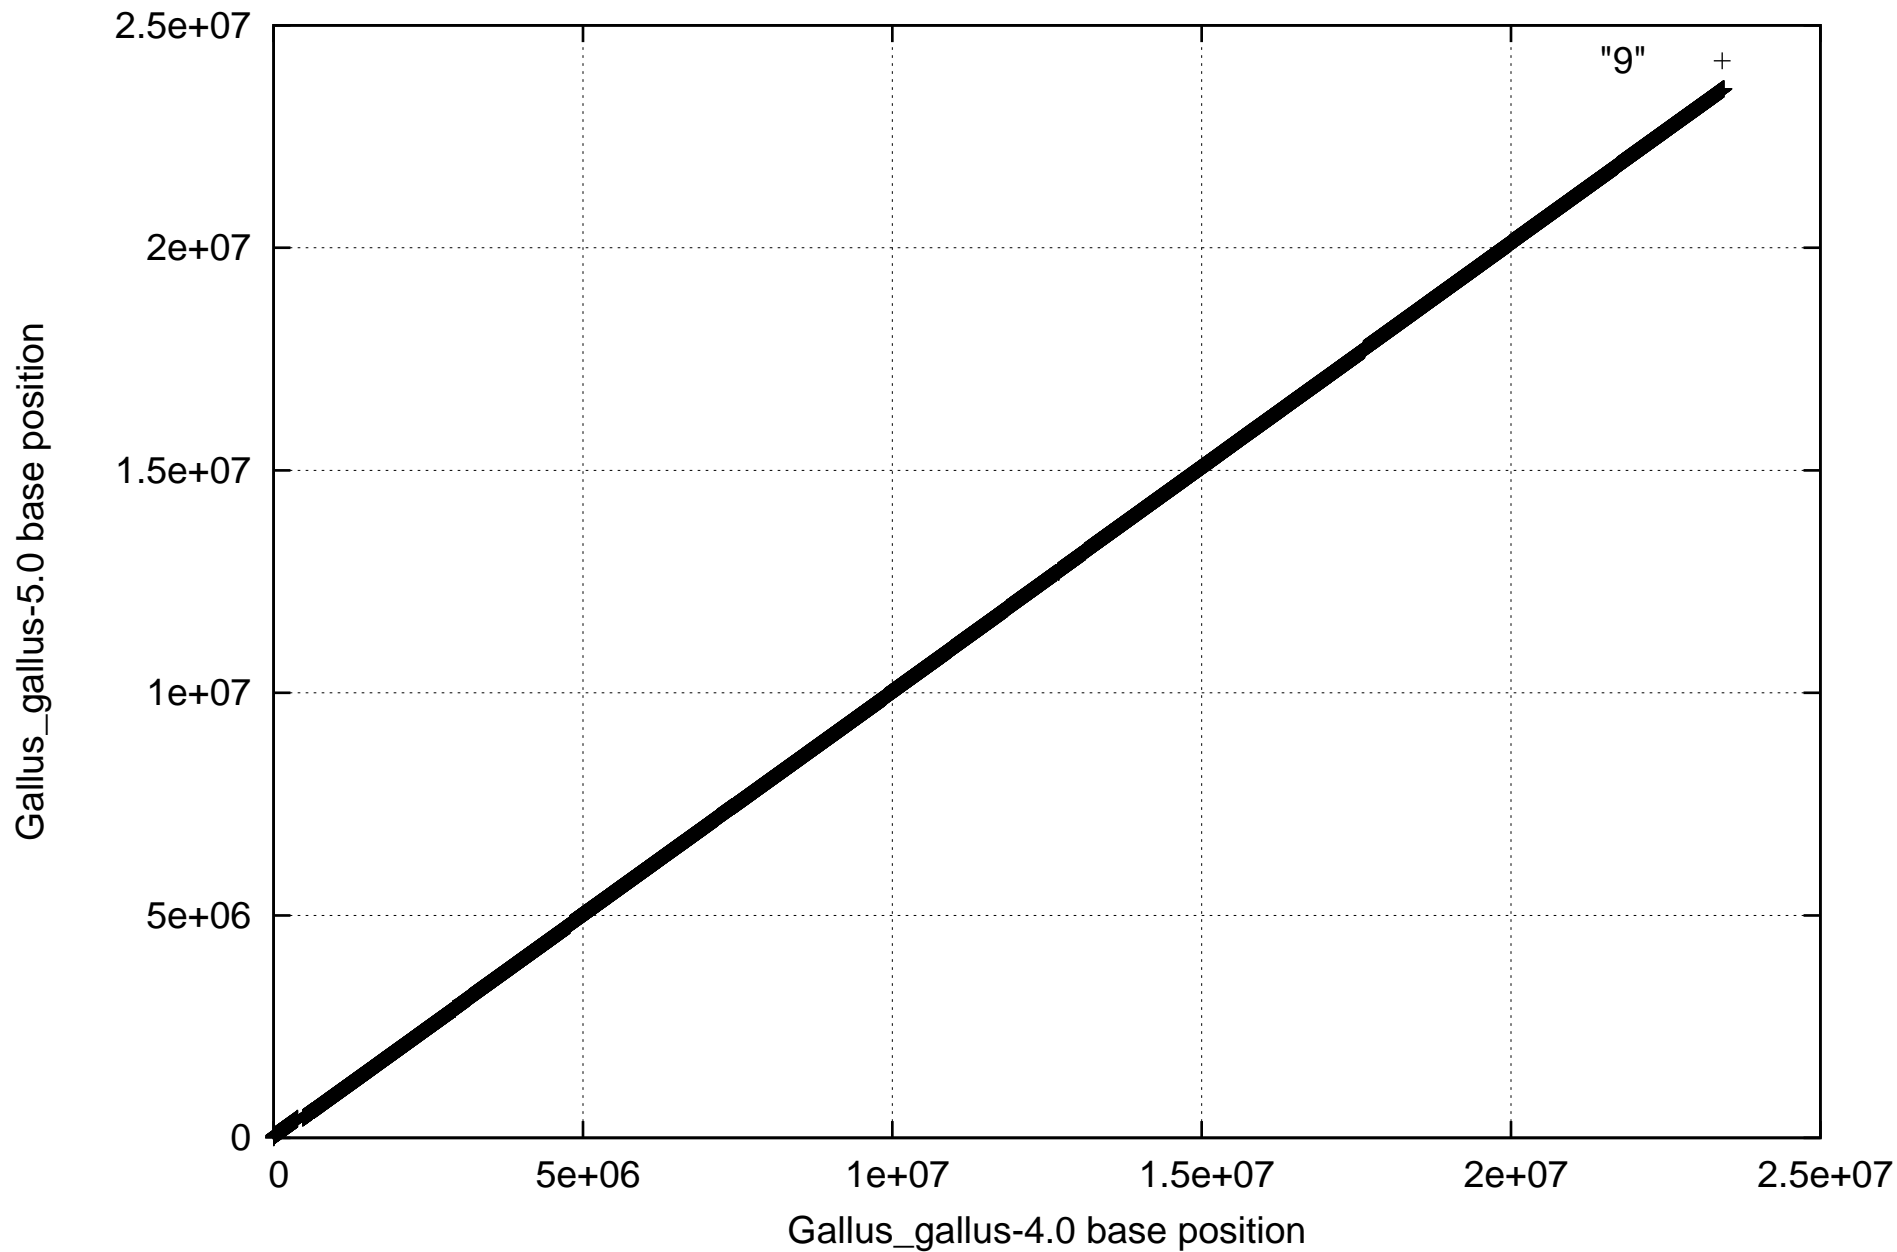

Gallus\_gallus-4.0 vs Gallus\_gallus-5.0

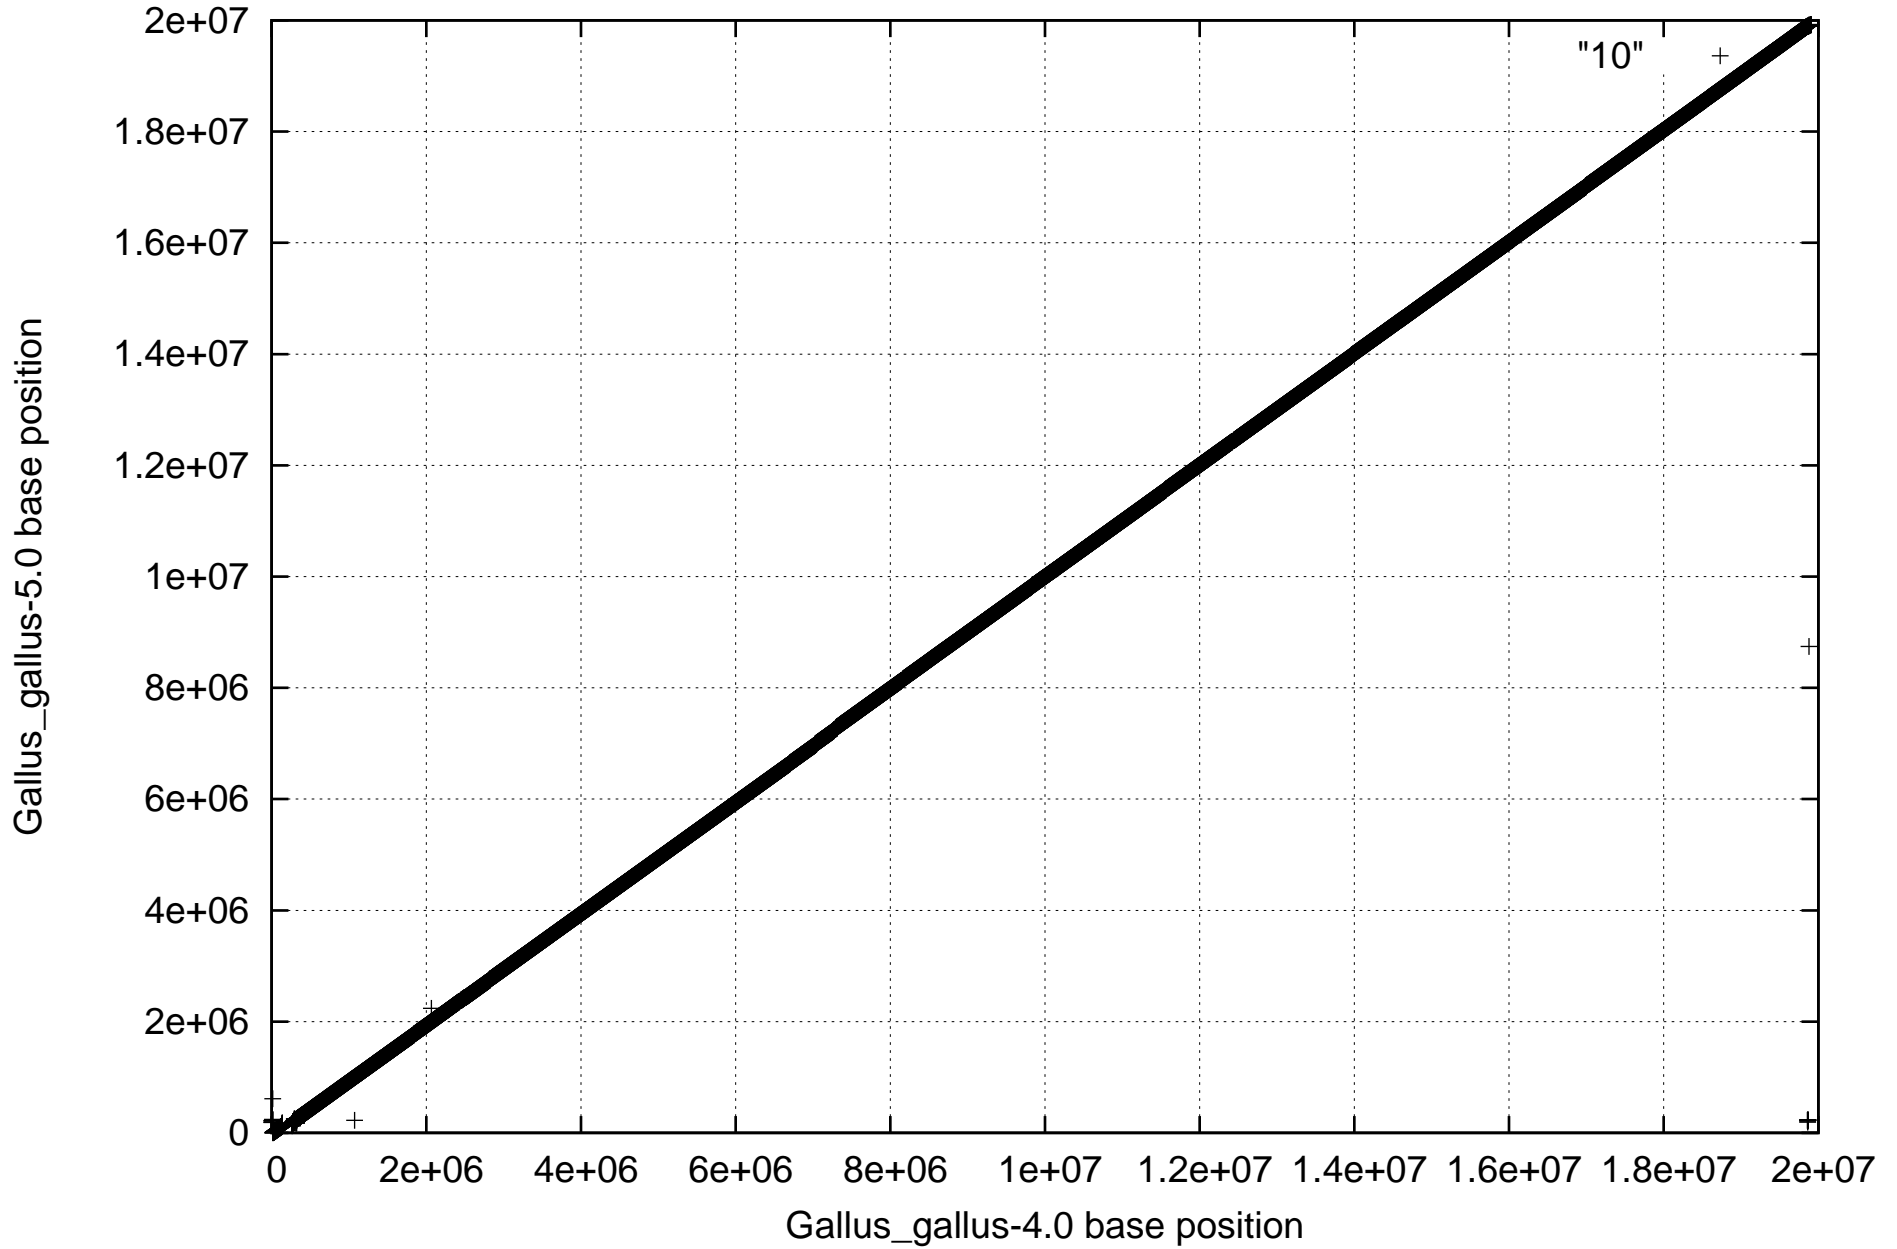

Gallus\_gallus-4.0 vs Gallus\_gallus-5.0

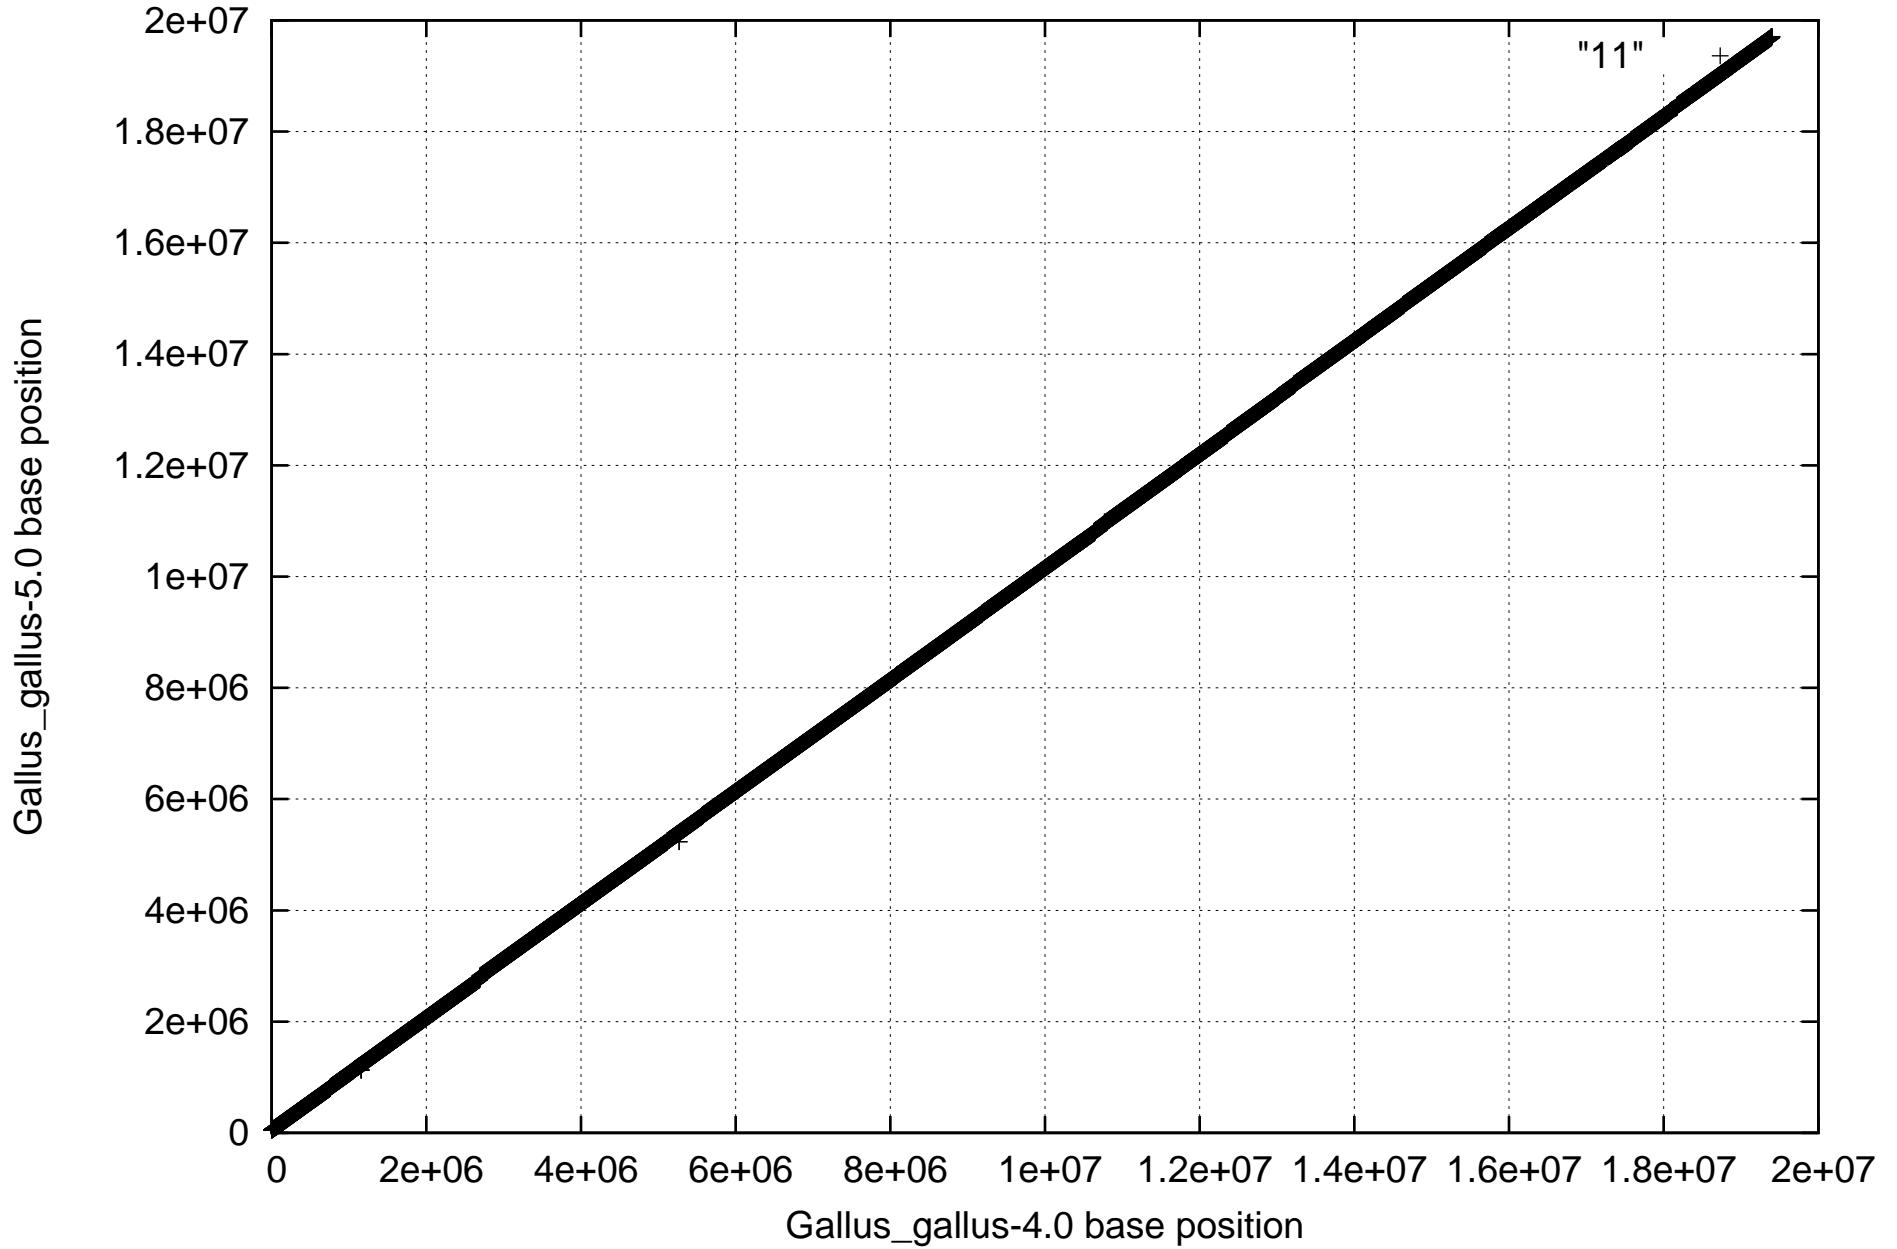

Gallus\_gallus-4.0 vs Gallus\_gallus-5.0

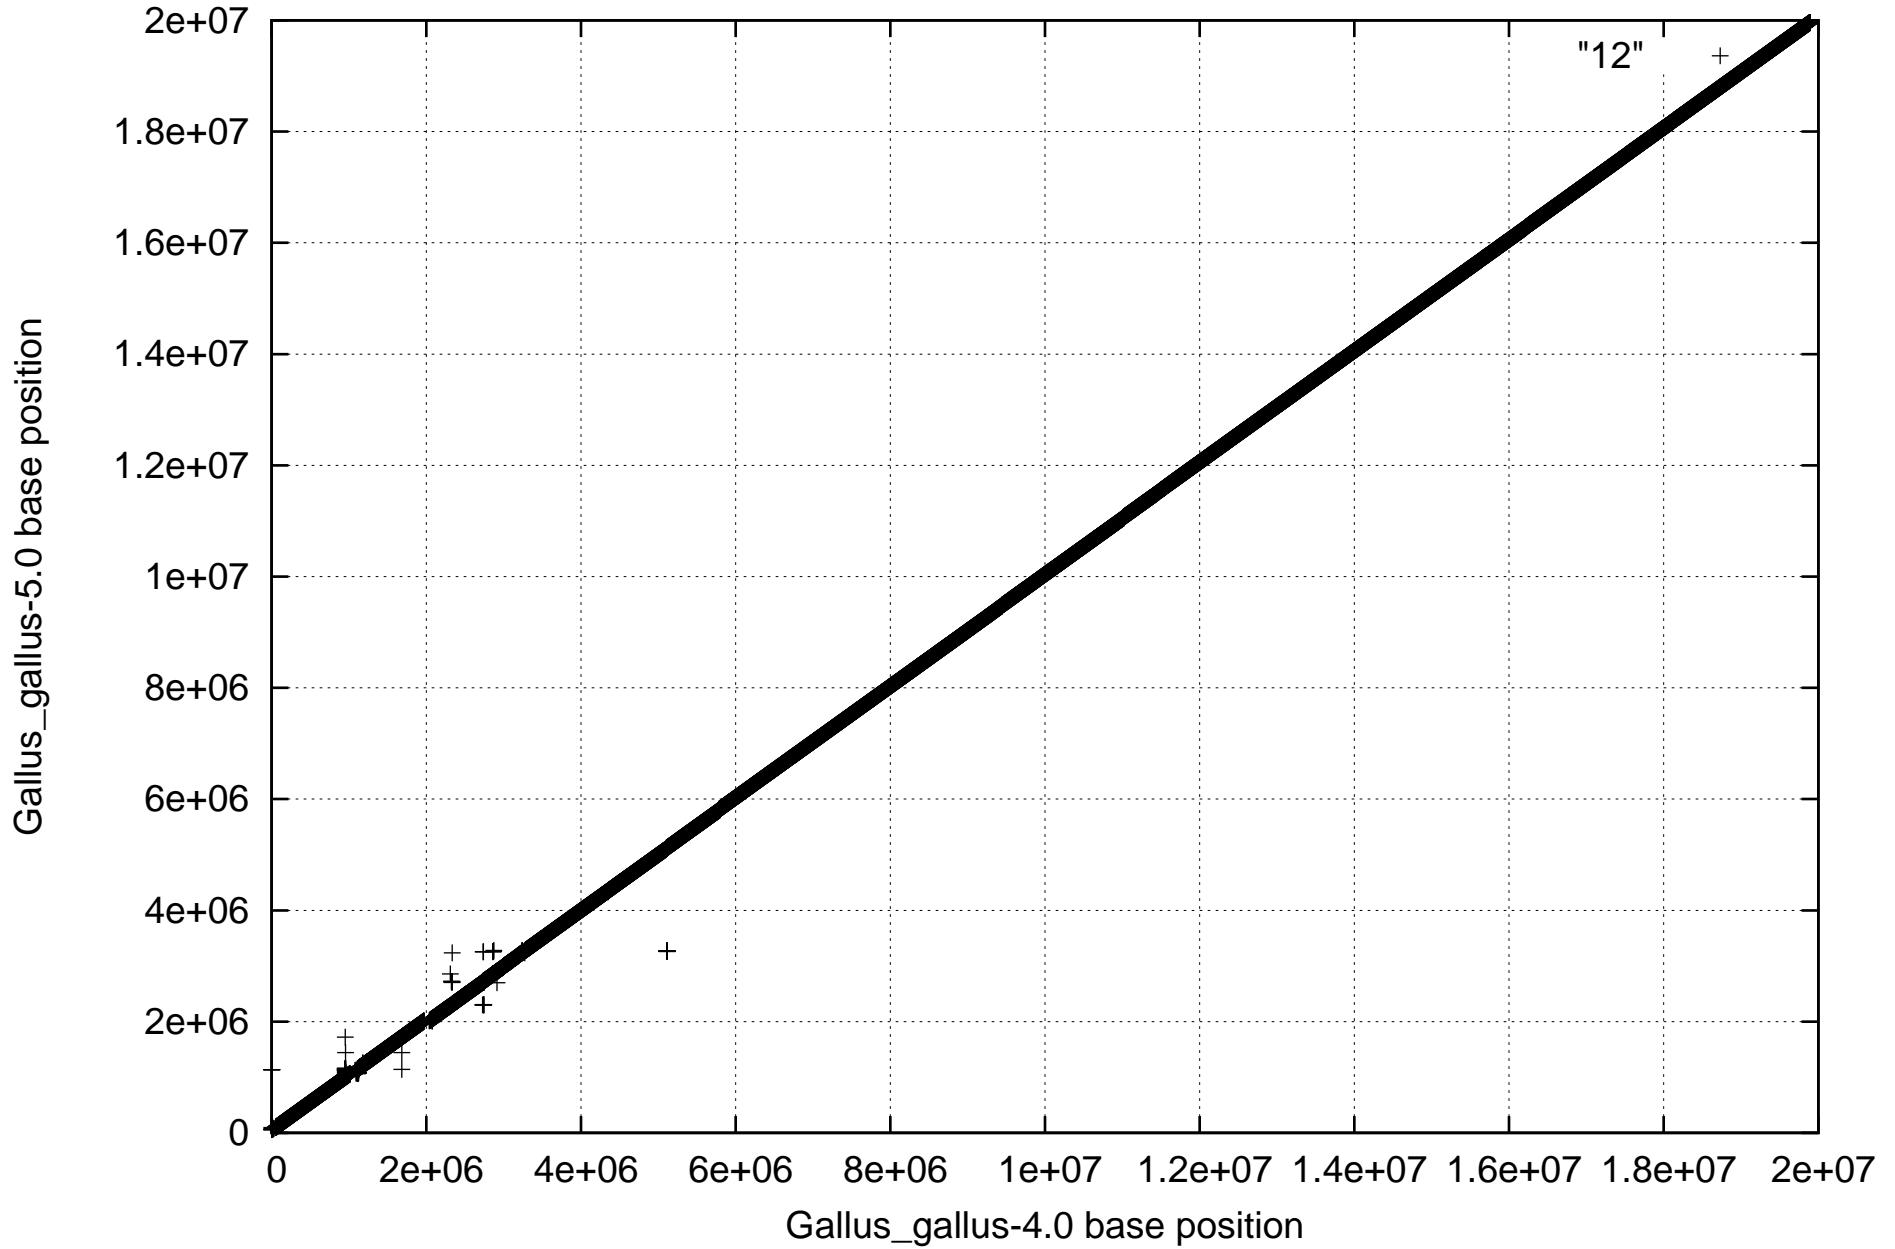

Gallus\_gallus-4.0 vs Gallus\_gallus-5.0

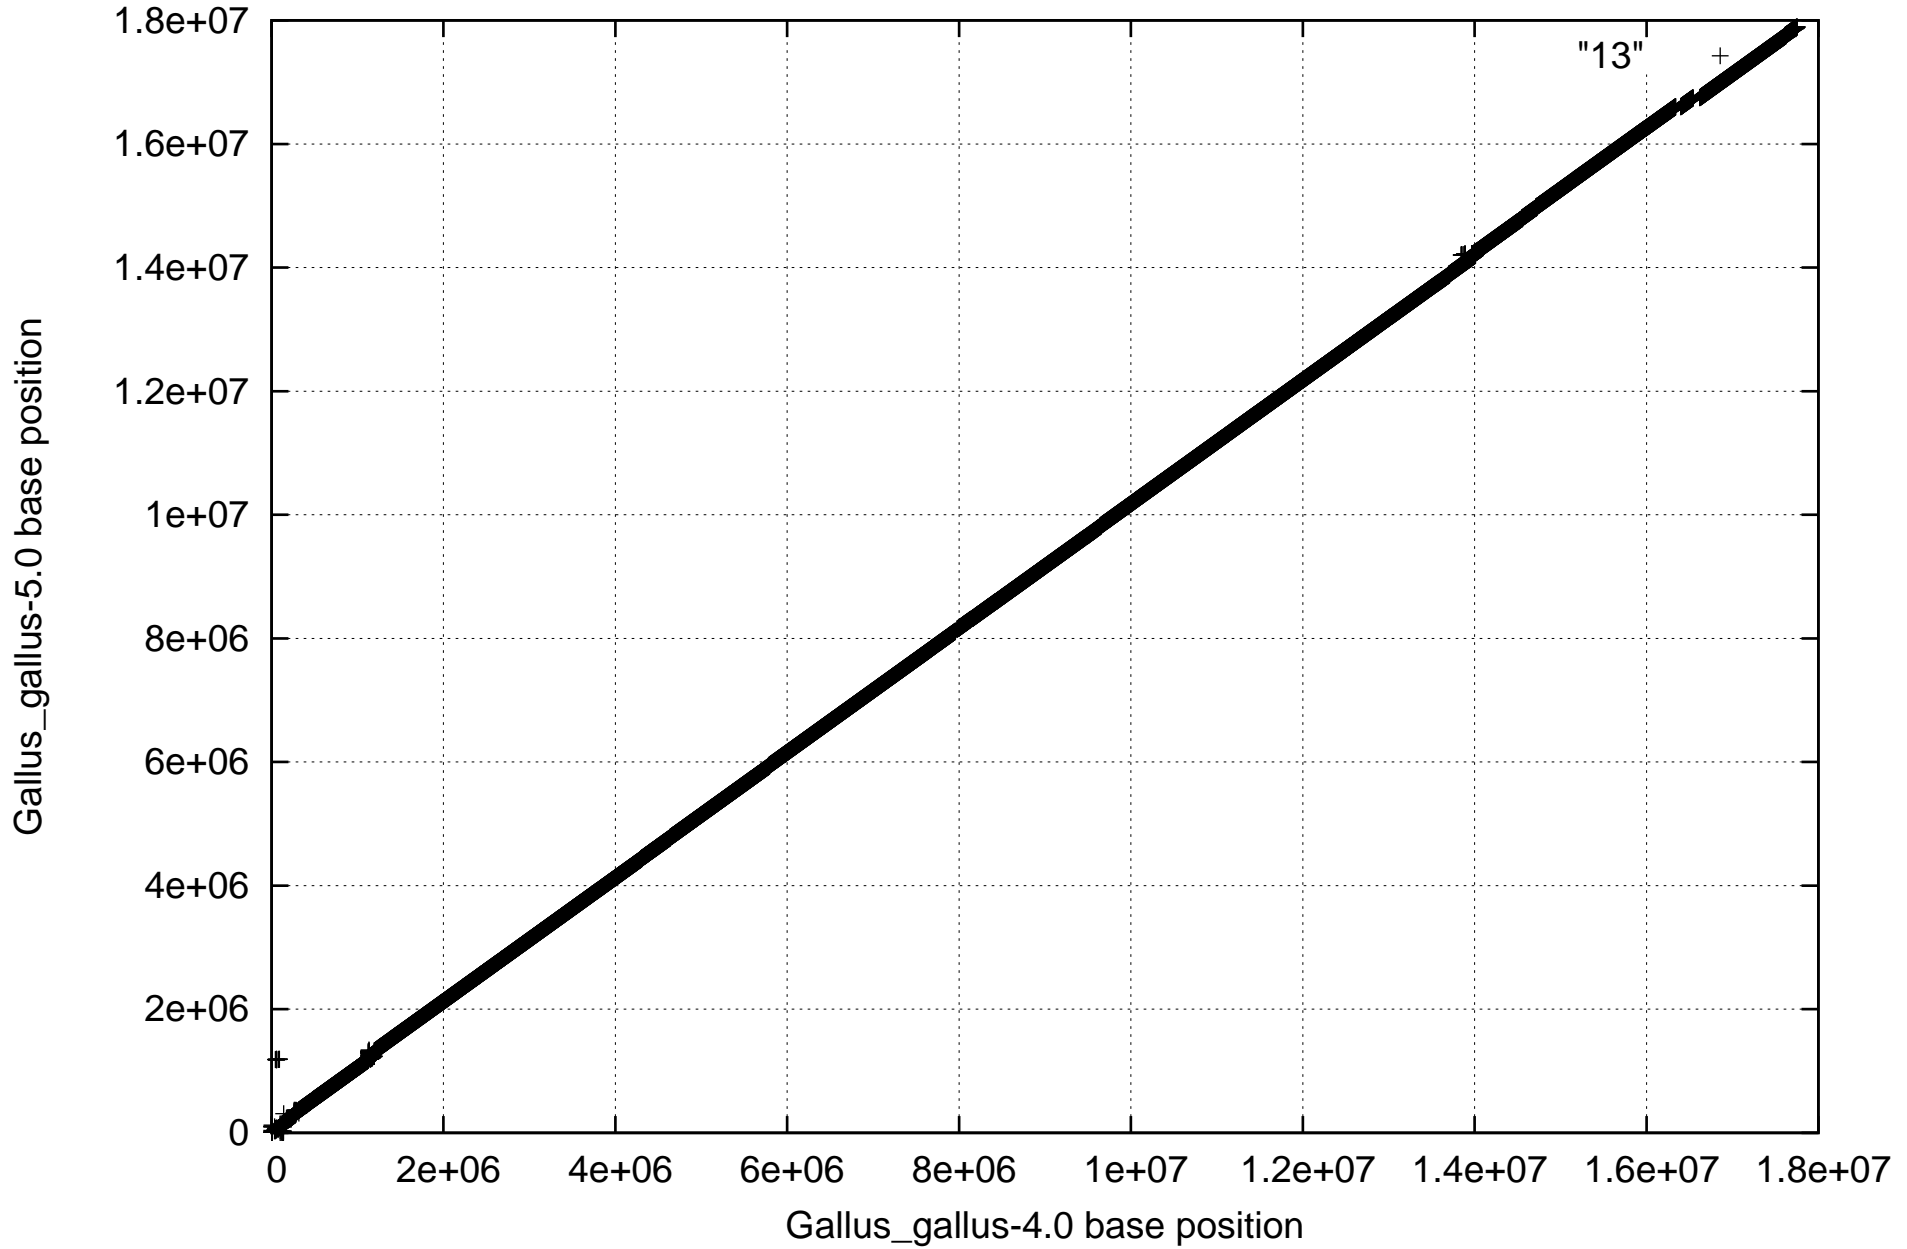

Gallus\_gallus-4.0 vs Gallus\_gallus-5.0

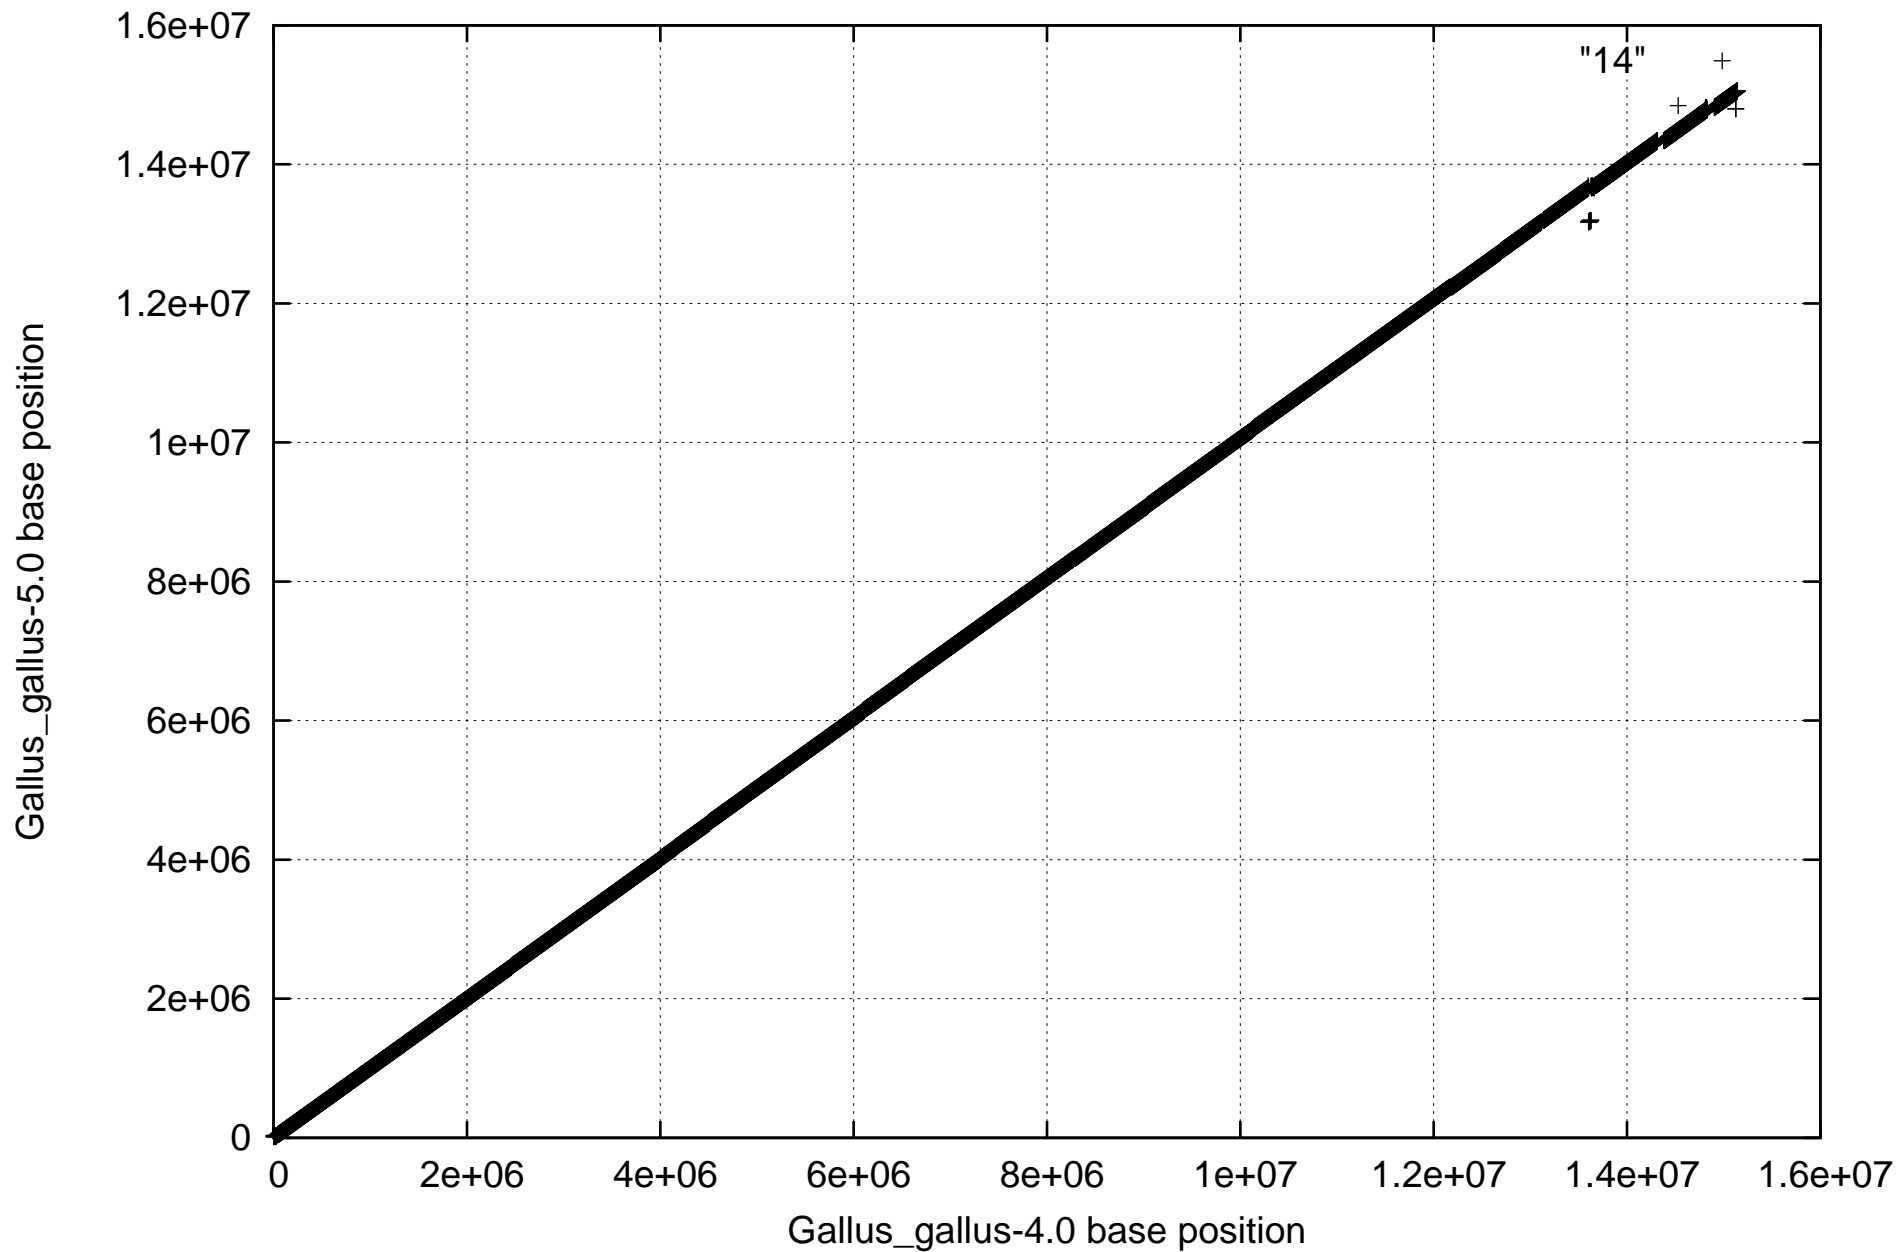

Gallus\_gallus-4.0 vs Gallus\_gallus-5.0

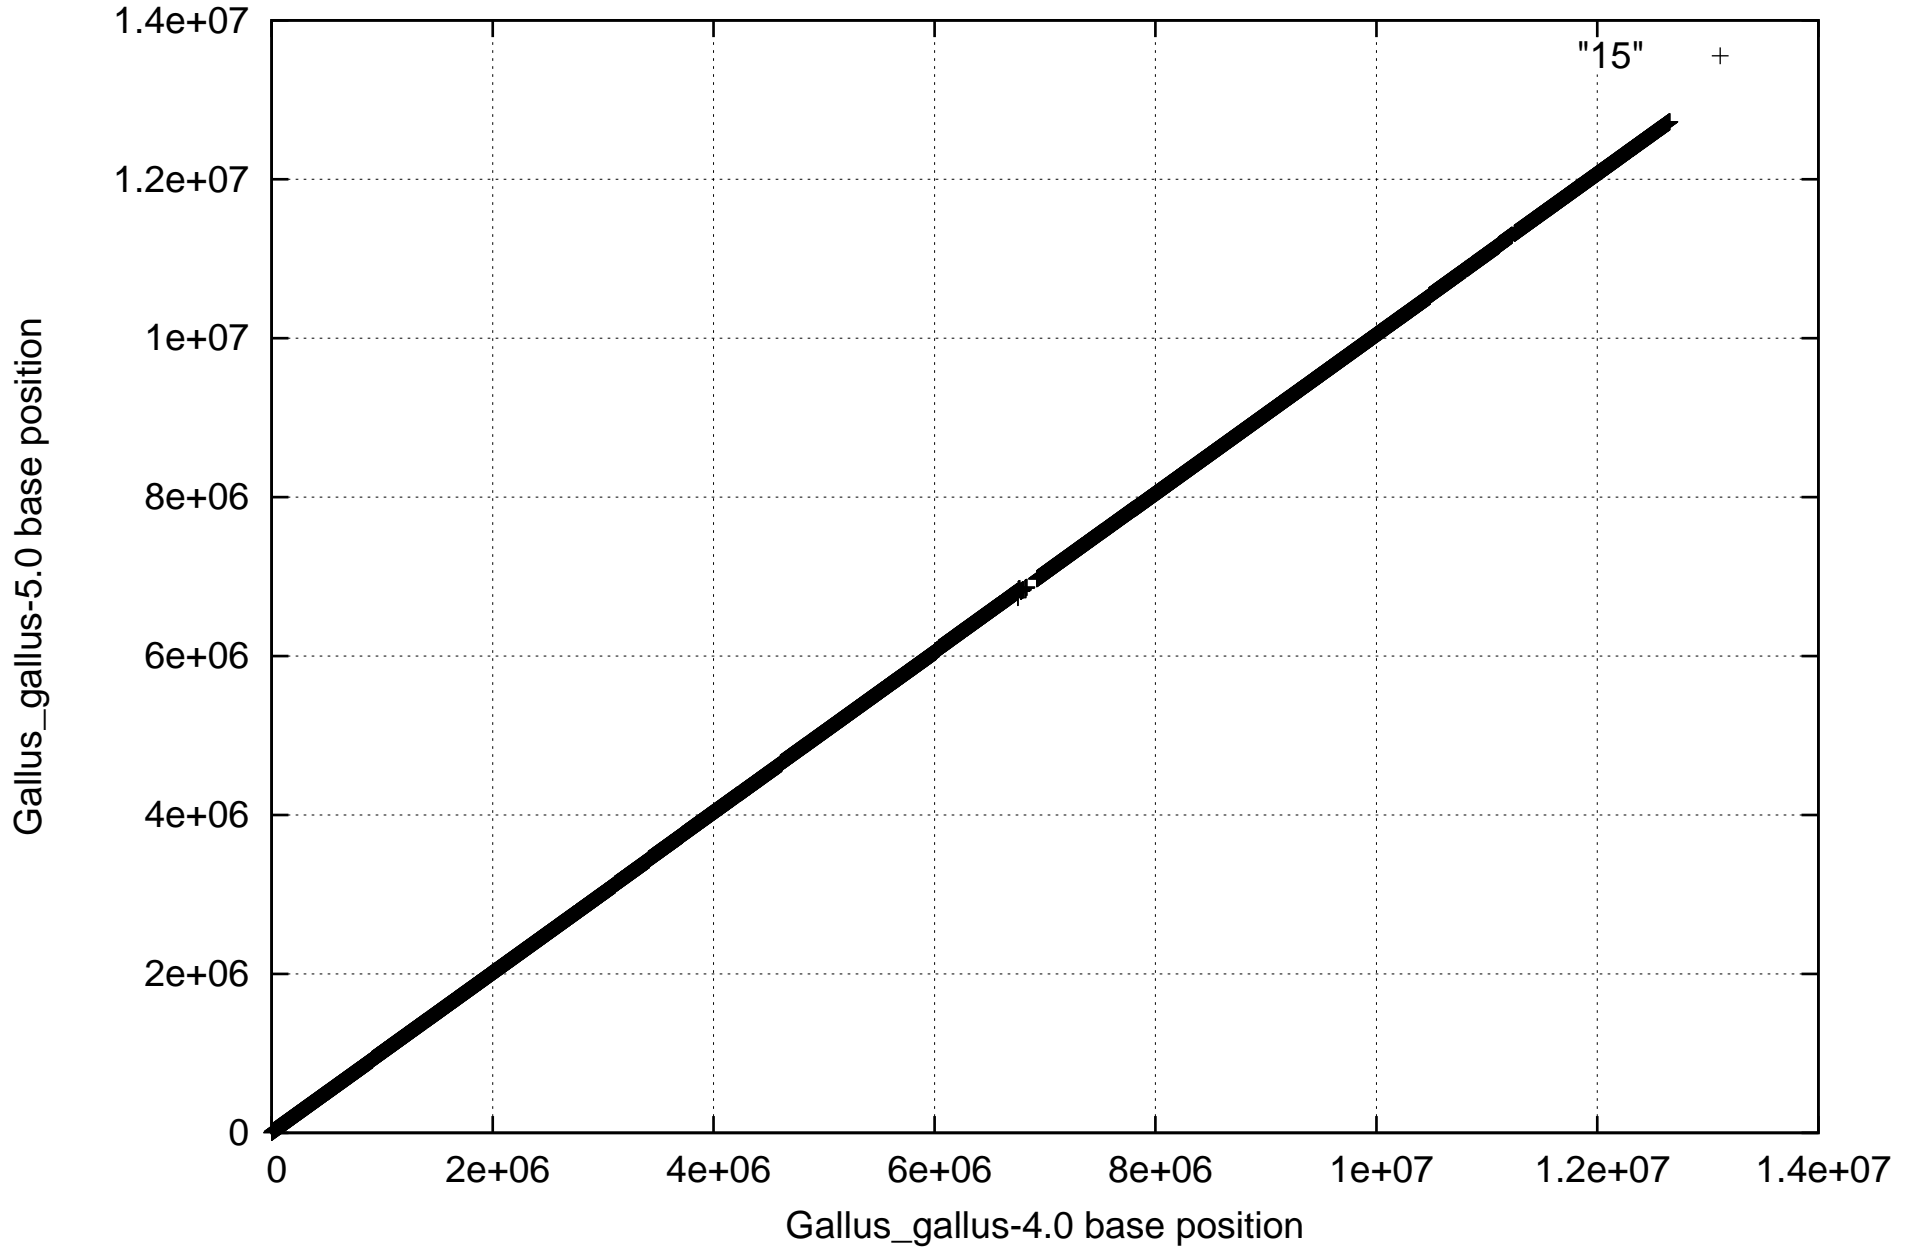

Gallus\_gallus-4.0 vs Gallus\_gallus-5.0

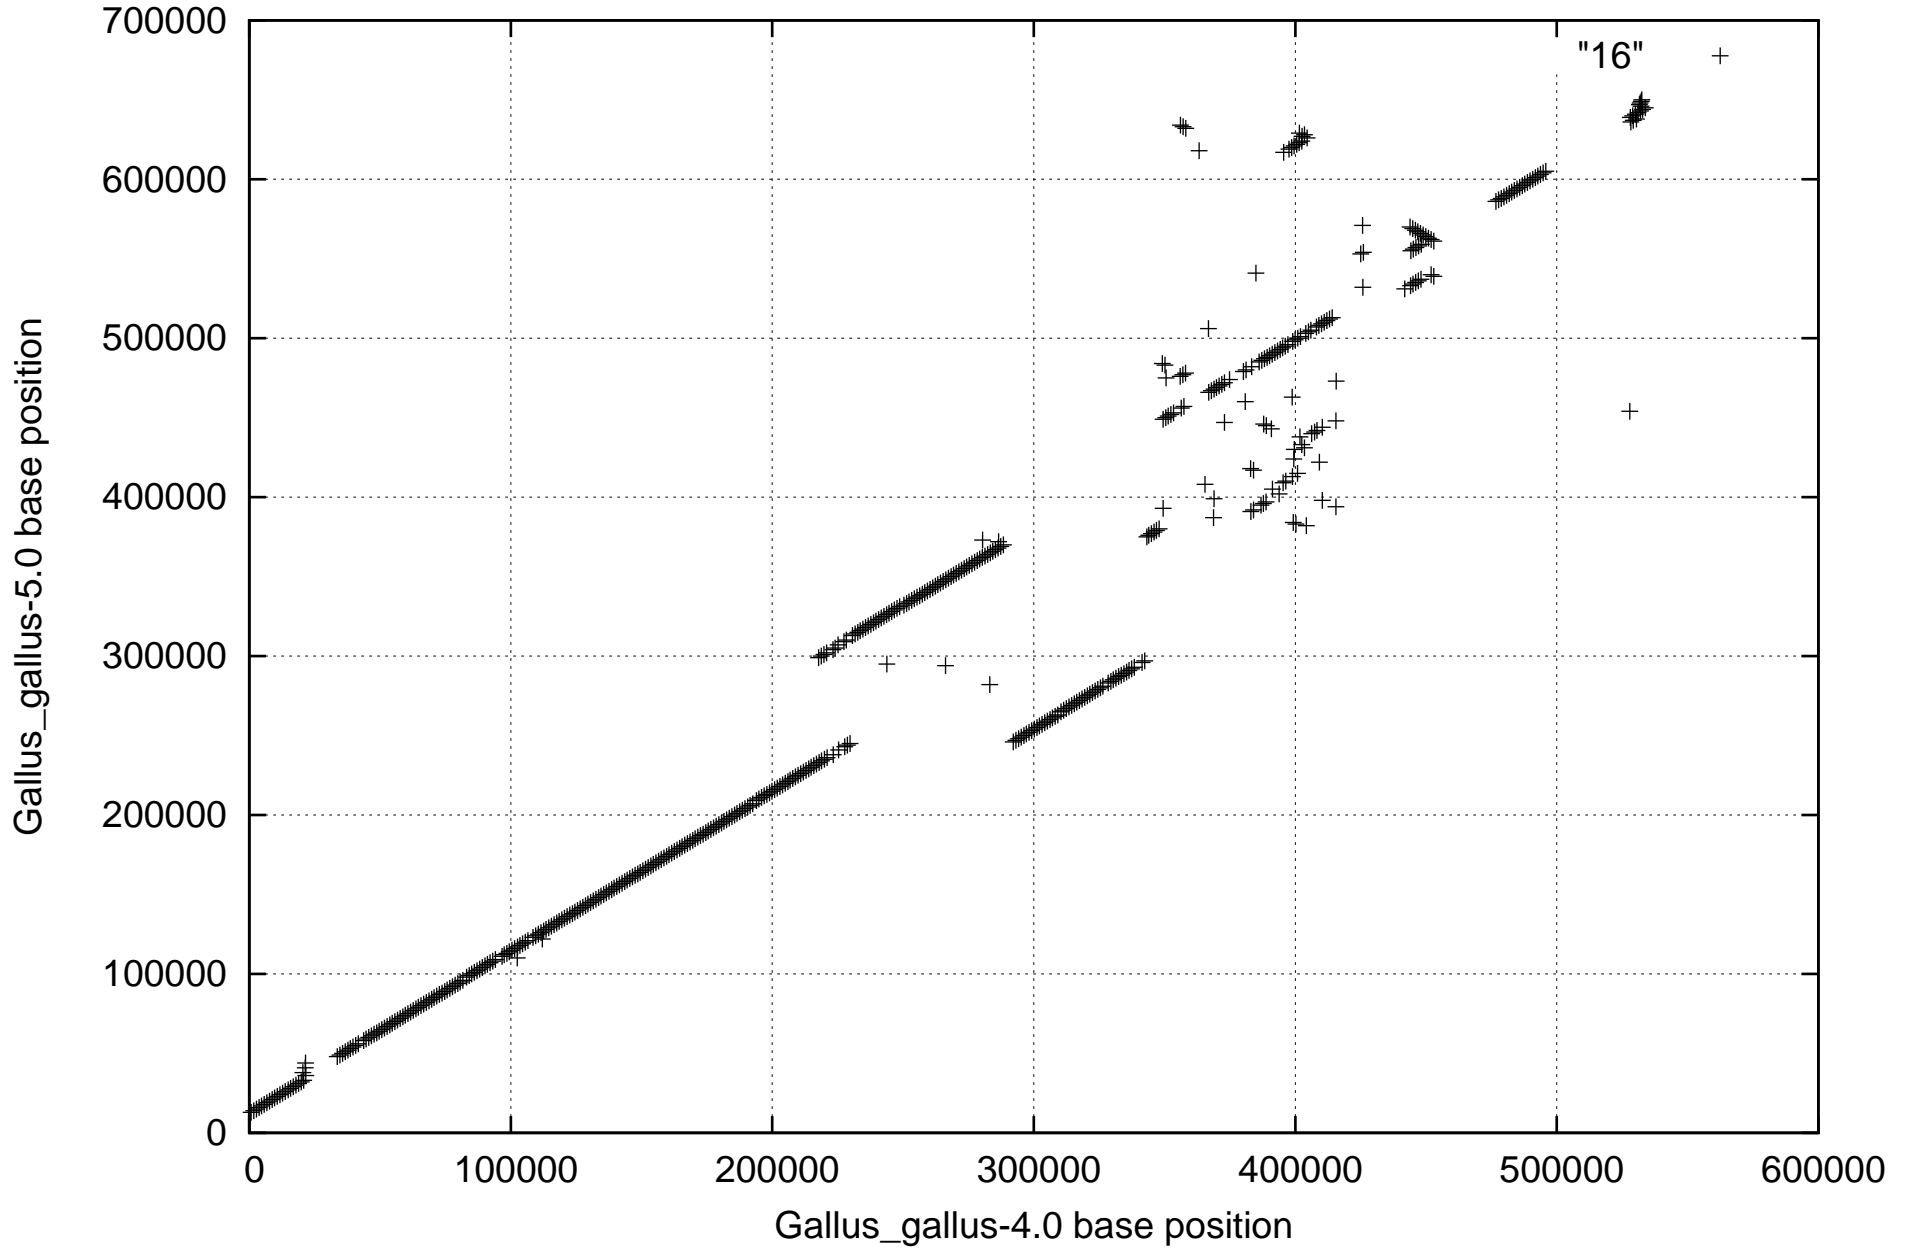



Gallus\_gallus-4.0 vs Gallus\_gallus-5.0

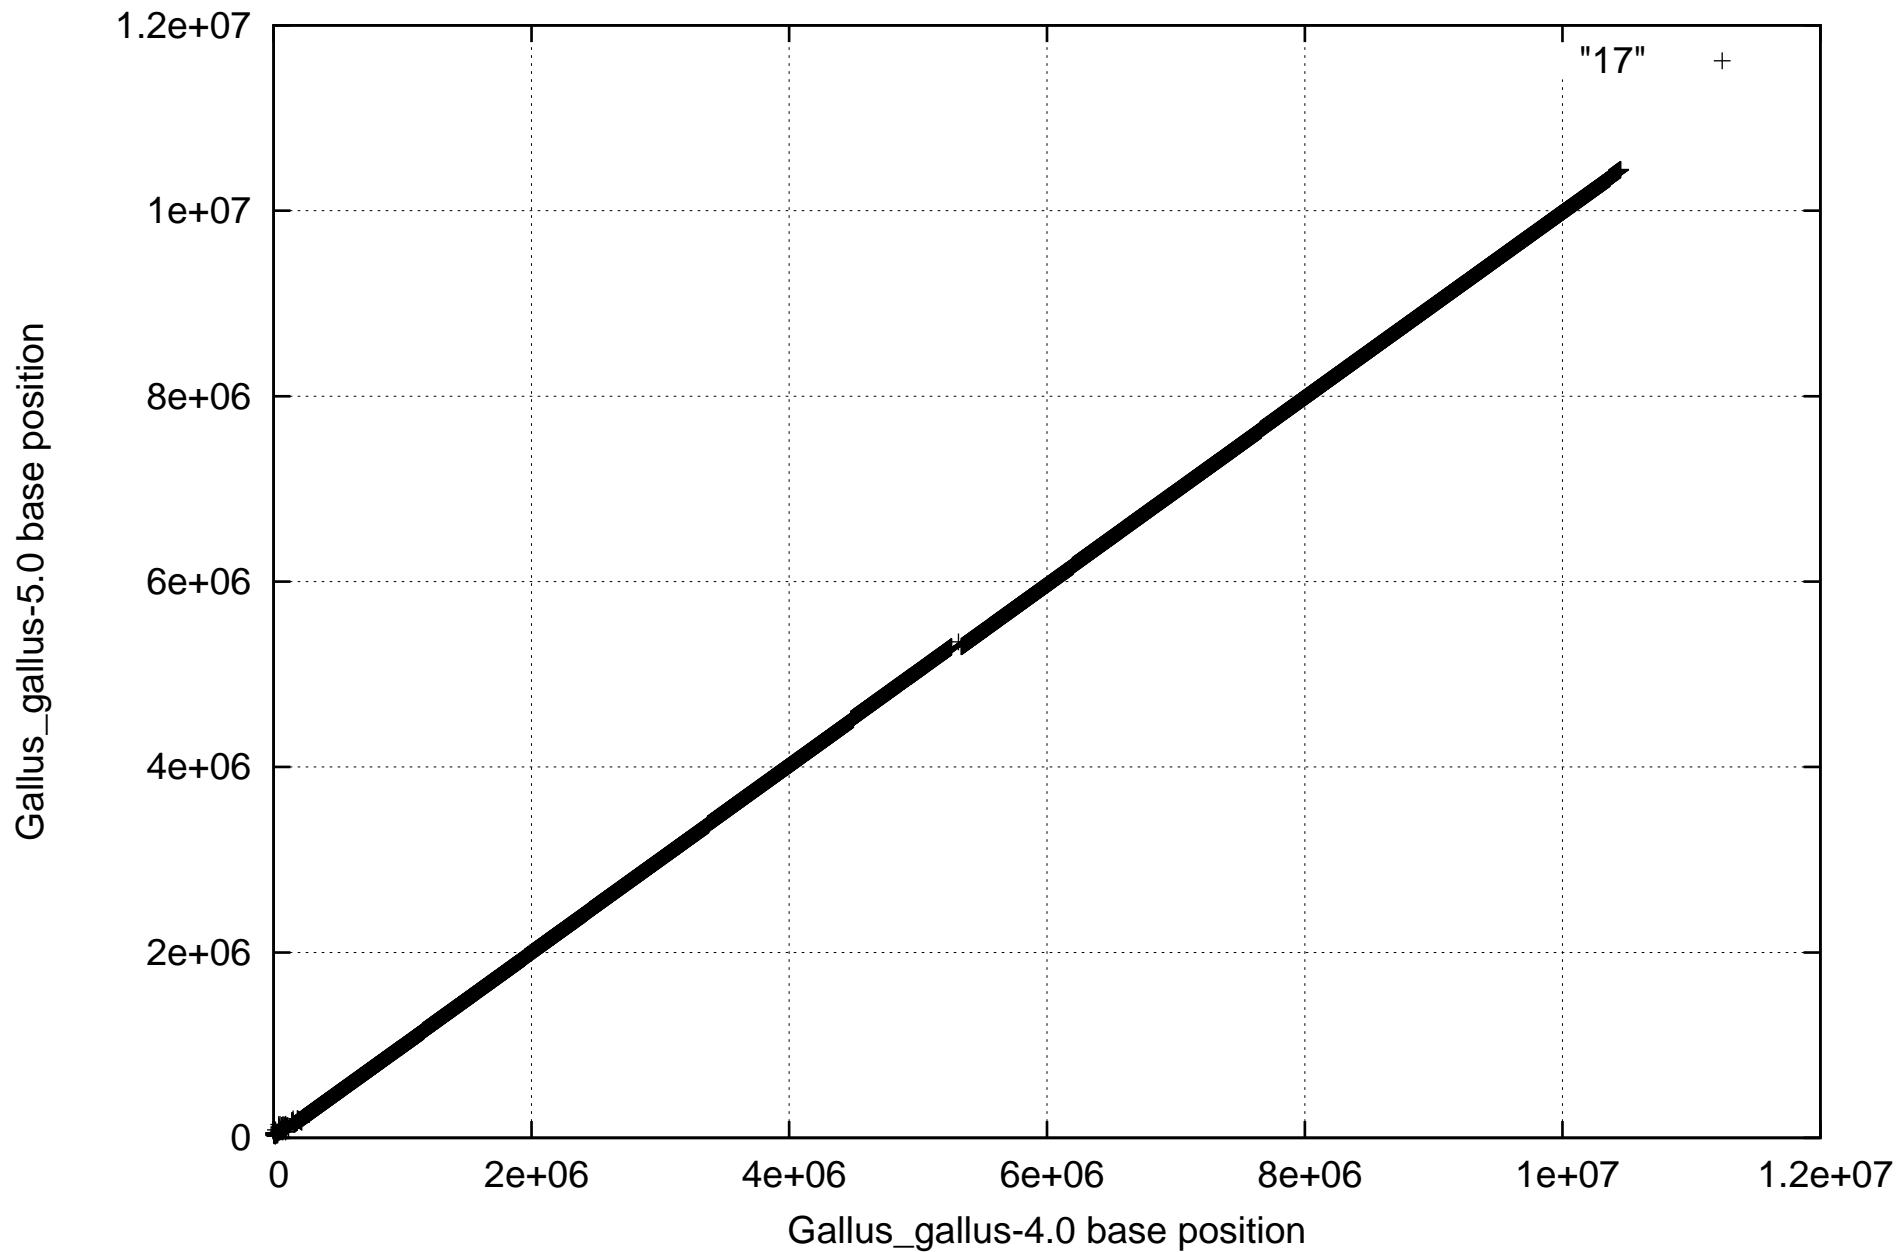

Gallus\_gallus-4.0 vs Gallus\_gallus-5.0

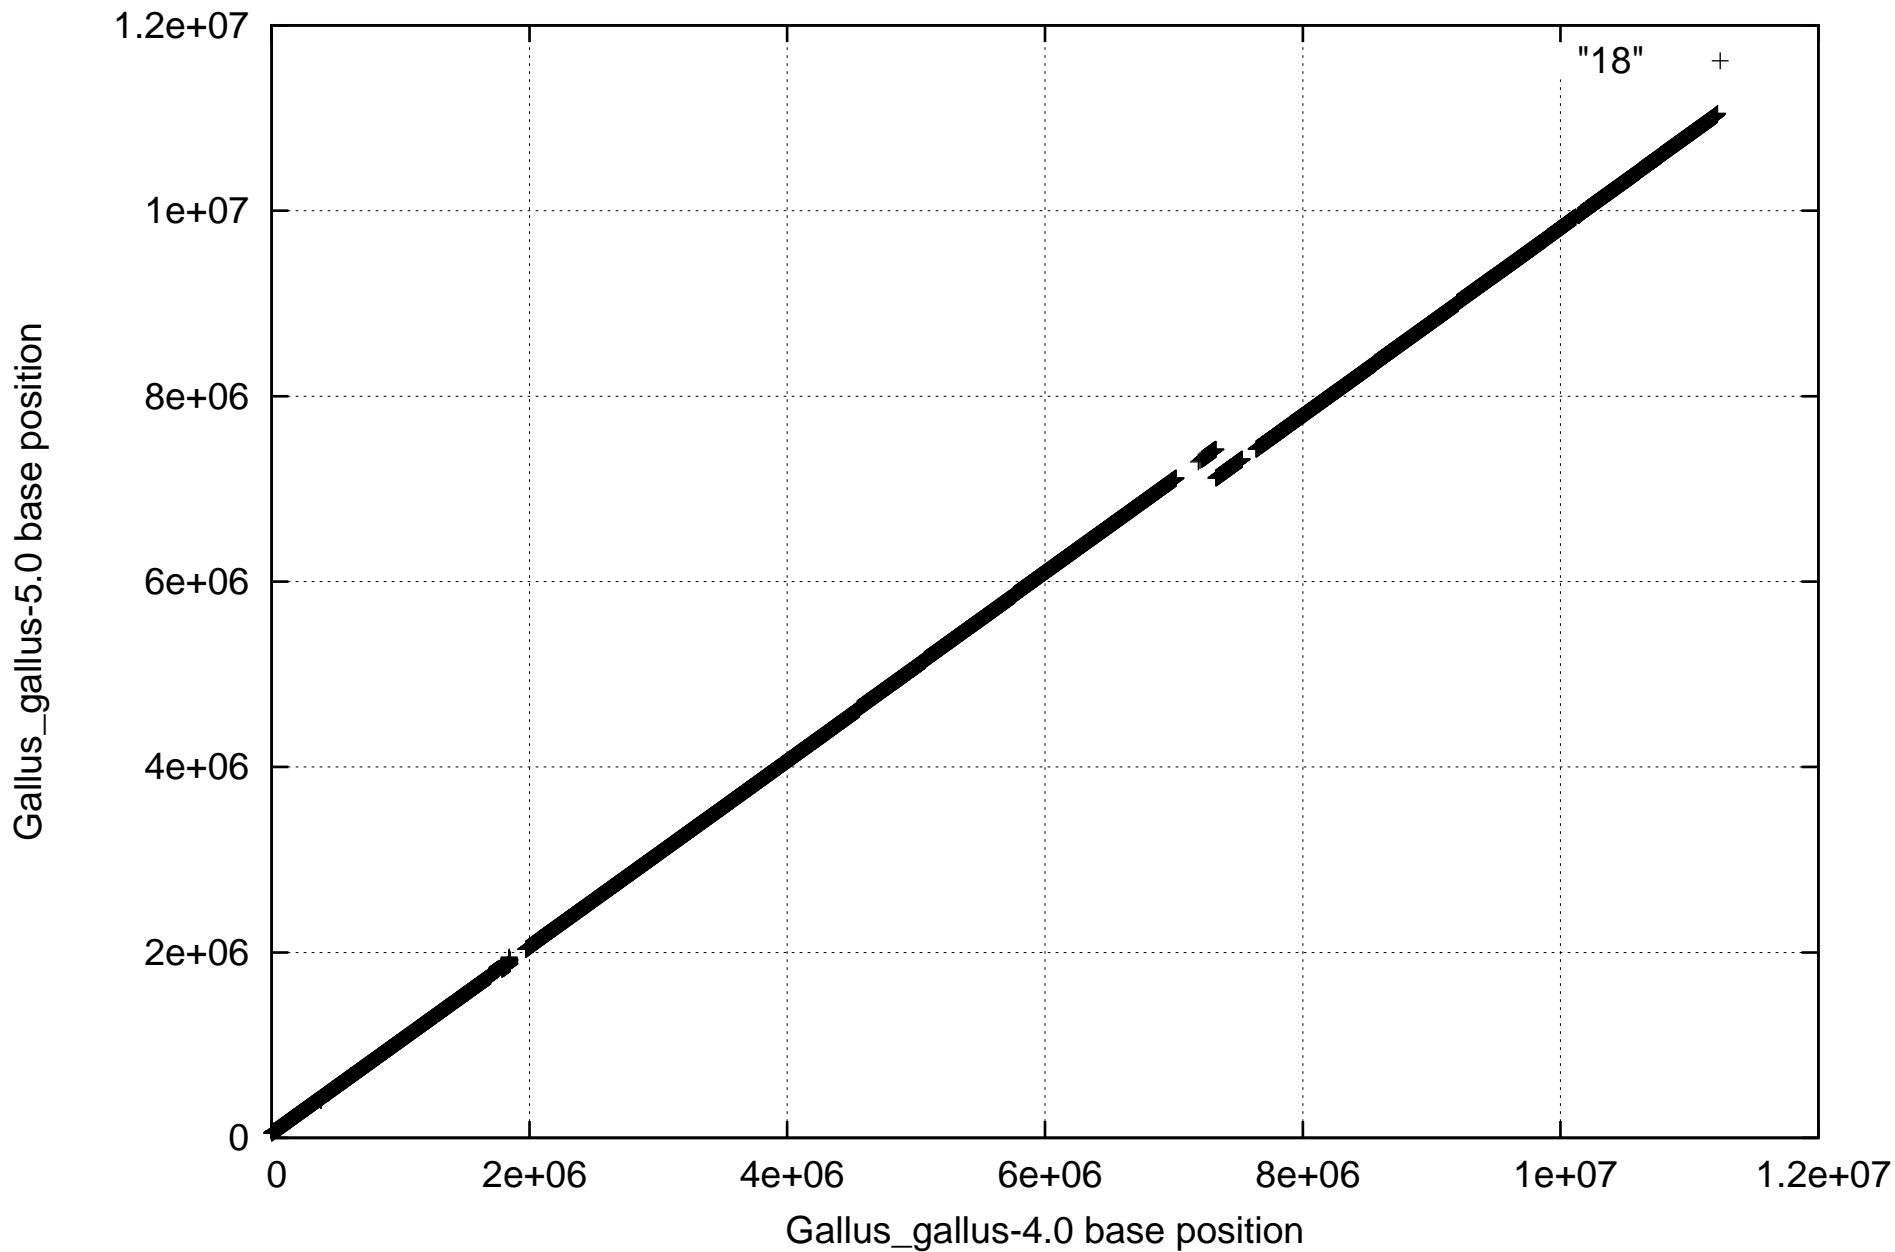

Gallus\_gallus-4.0 vs Gallus\_gallus-5.0

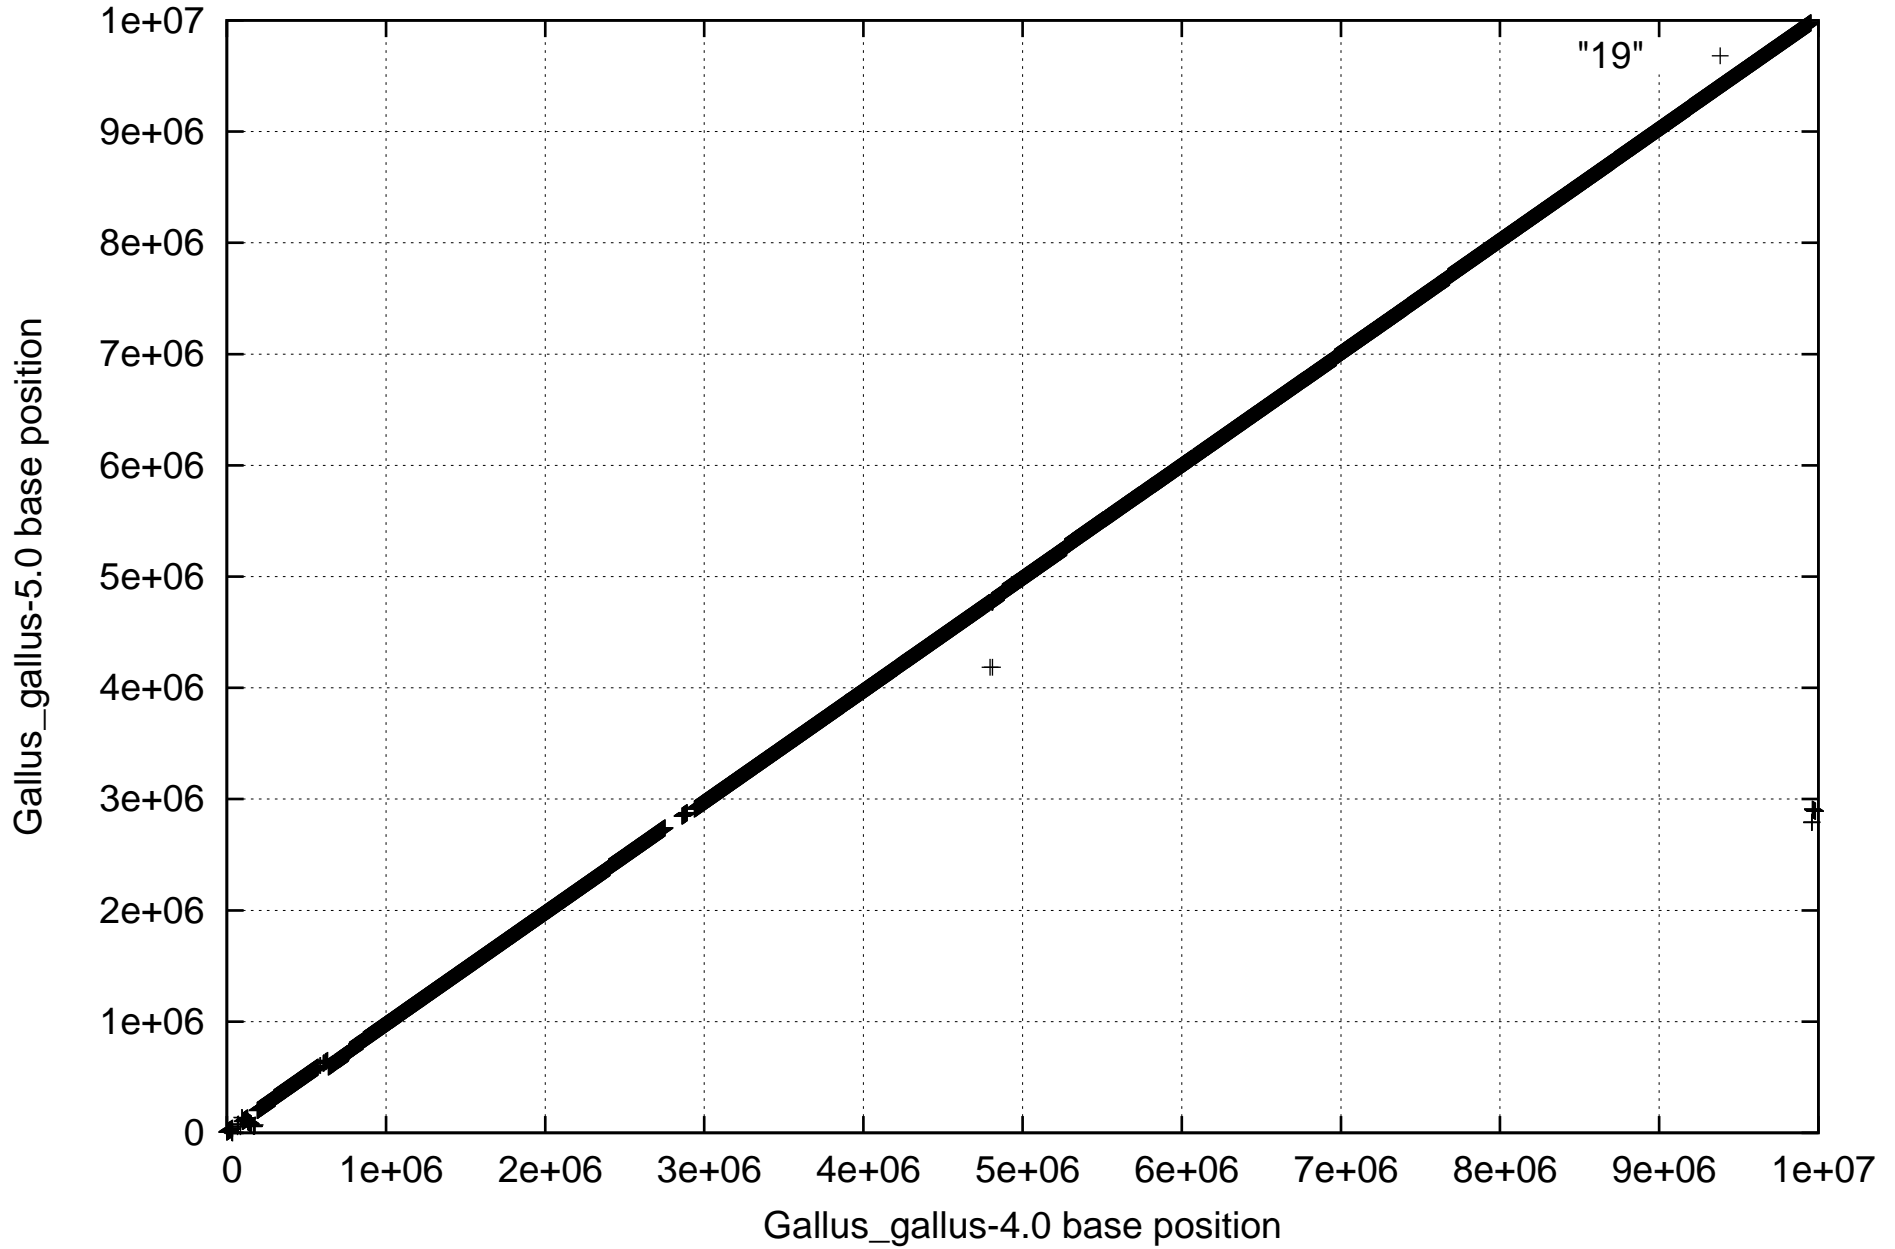

Gallus\_gallus-4.0 vs Gallus\_gallus-5.0

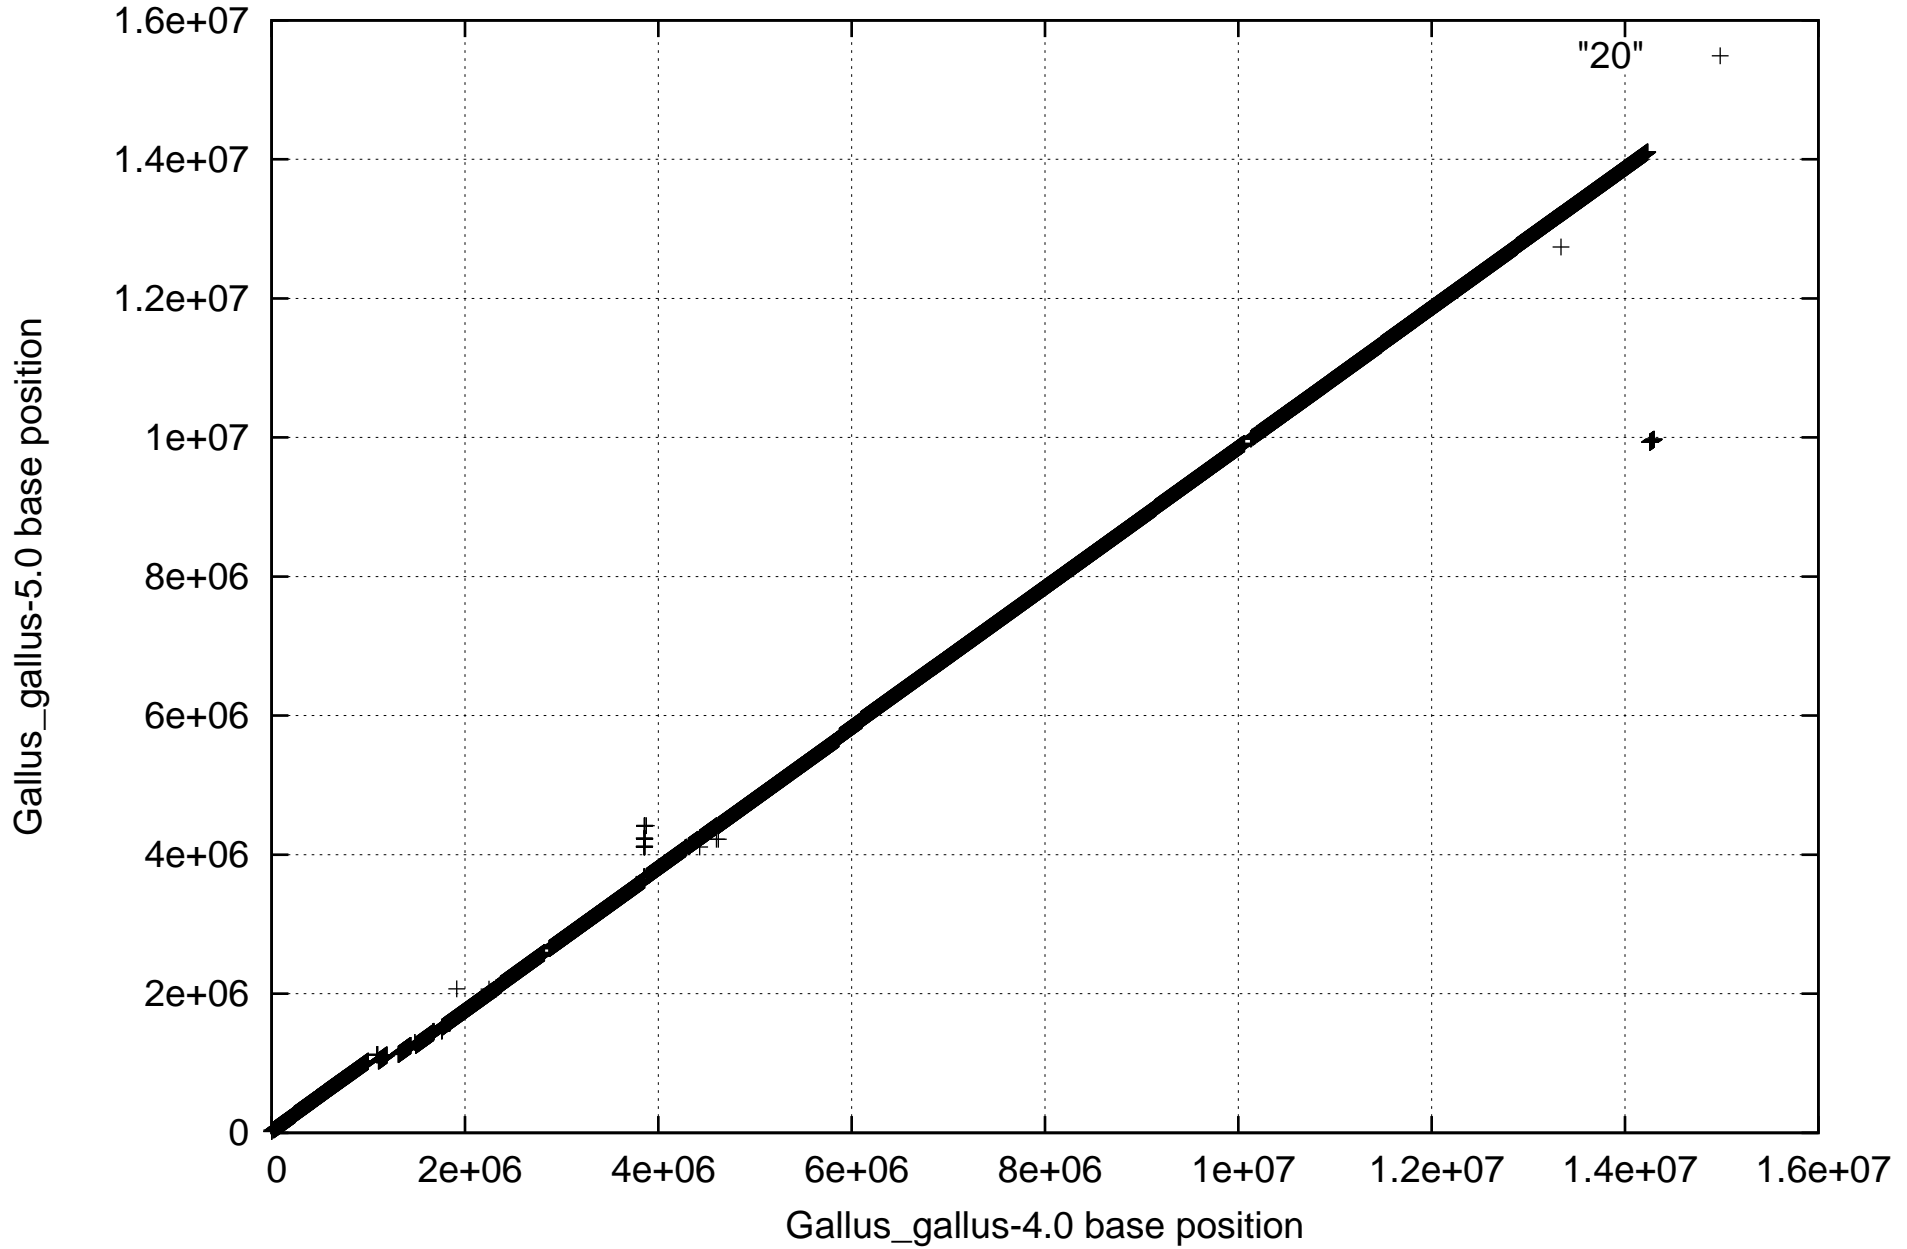

Gallus\_gallus-4.0 vs Gallus\_gallus-5.0

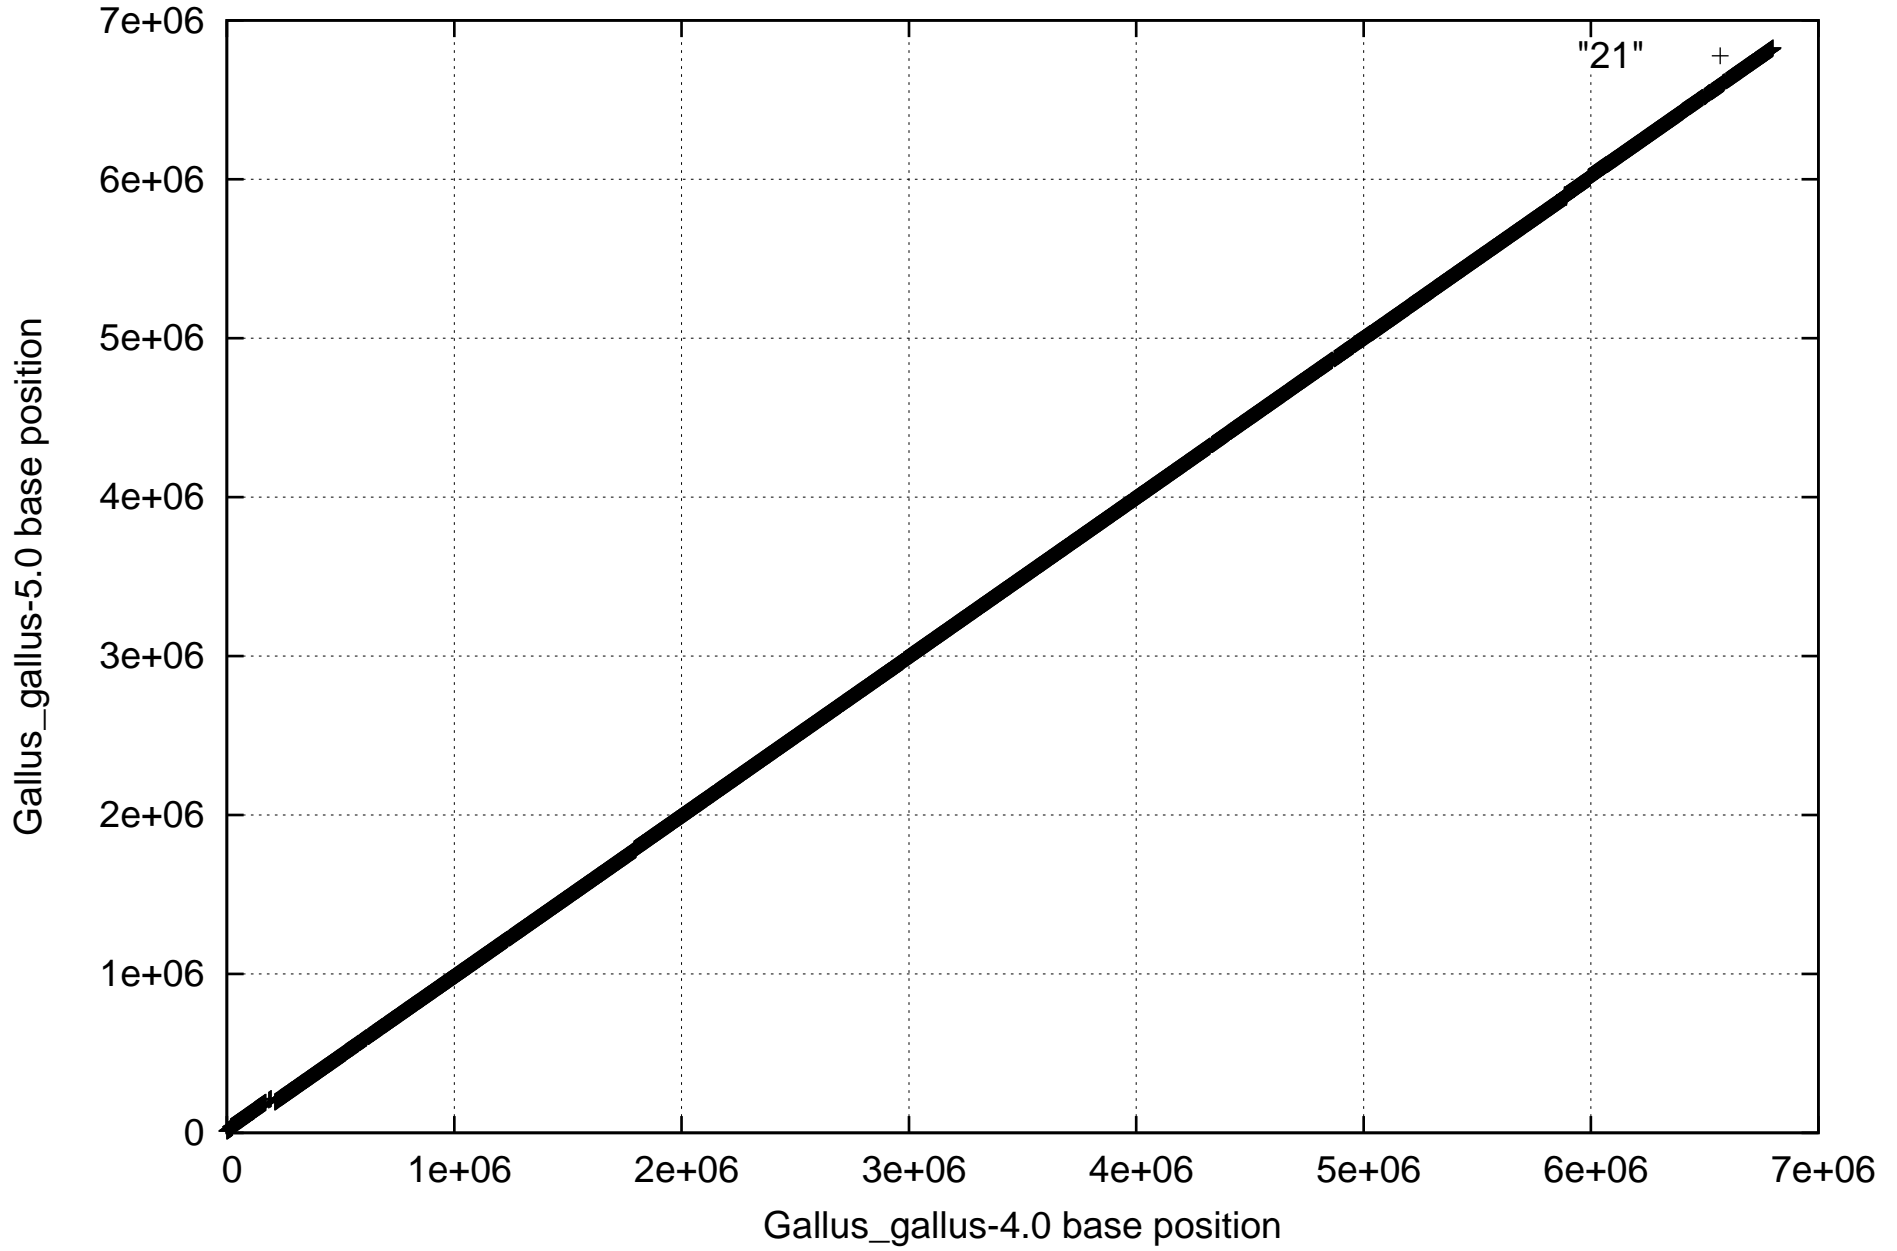

Gallus\_gallus-4.0 vs Gallus\_gallus-5.0

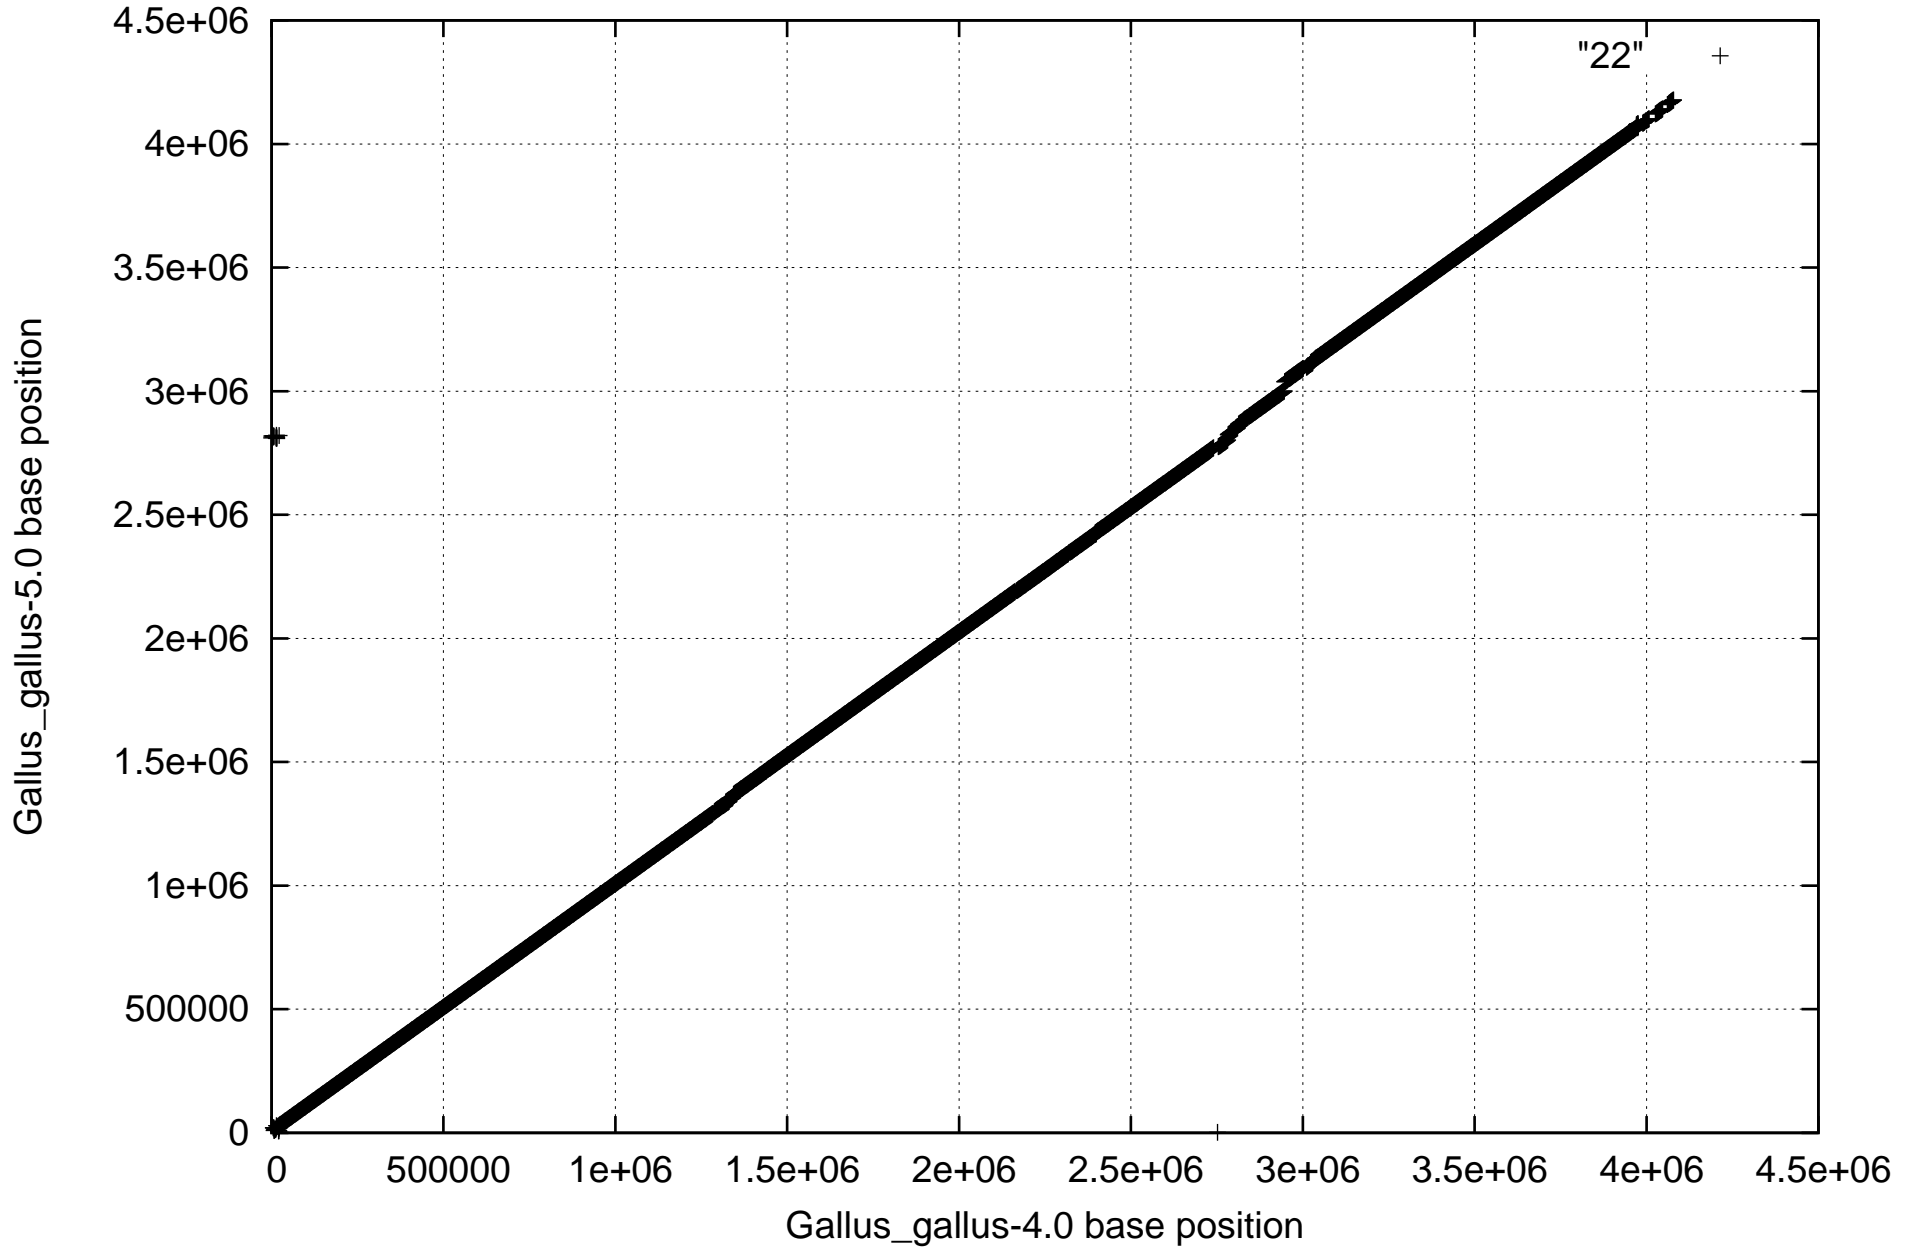

Gallus\_gallus-4.0 vs Gallus\_gallus-5.0

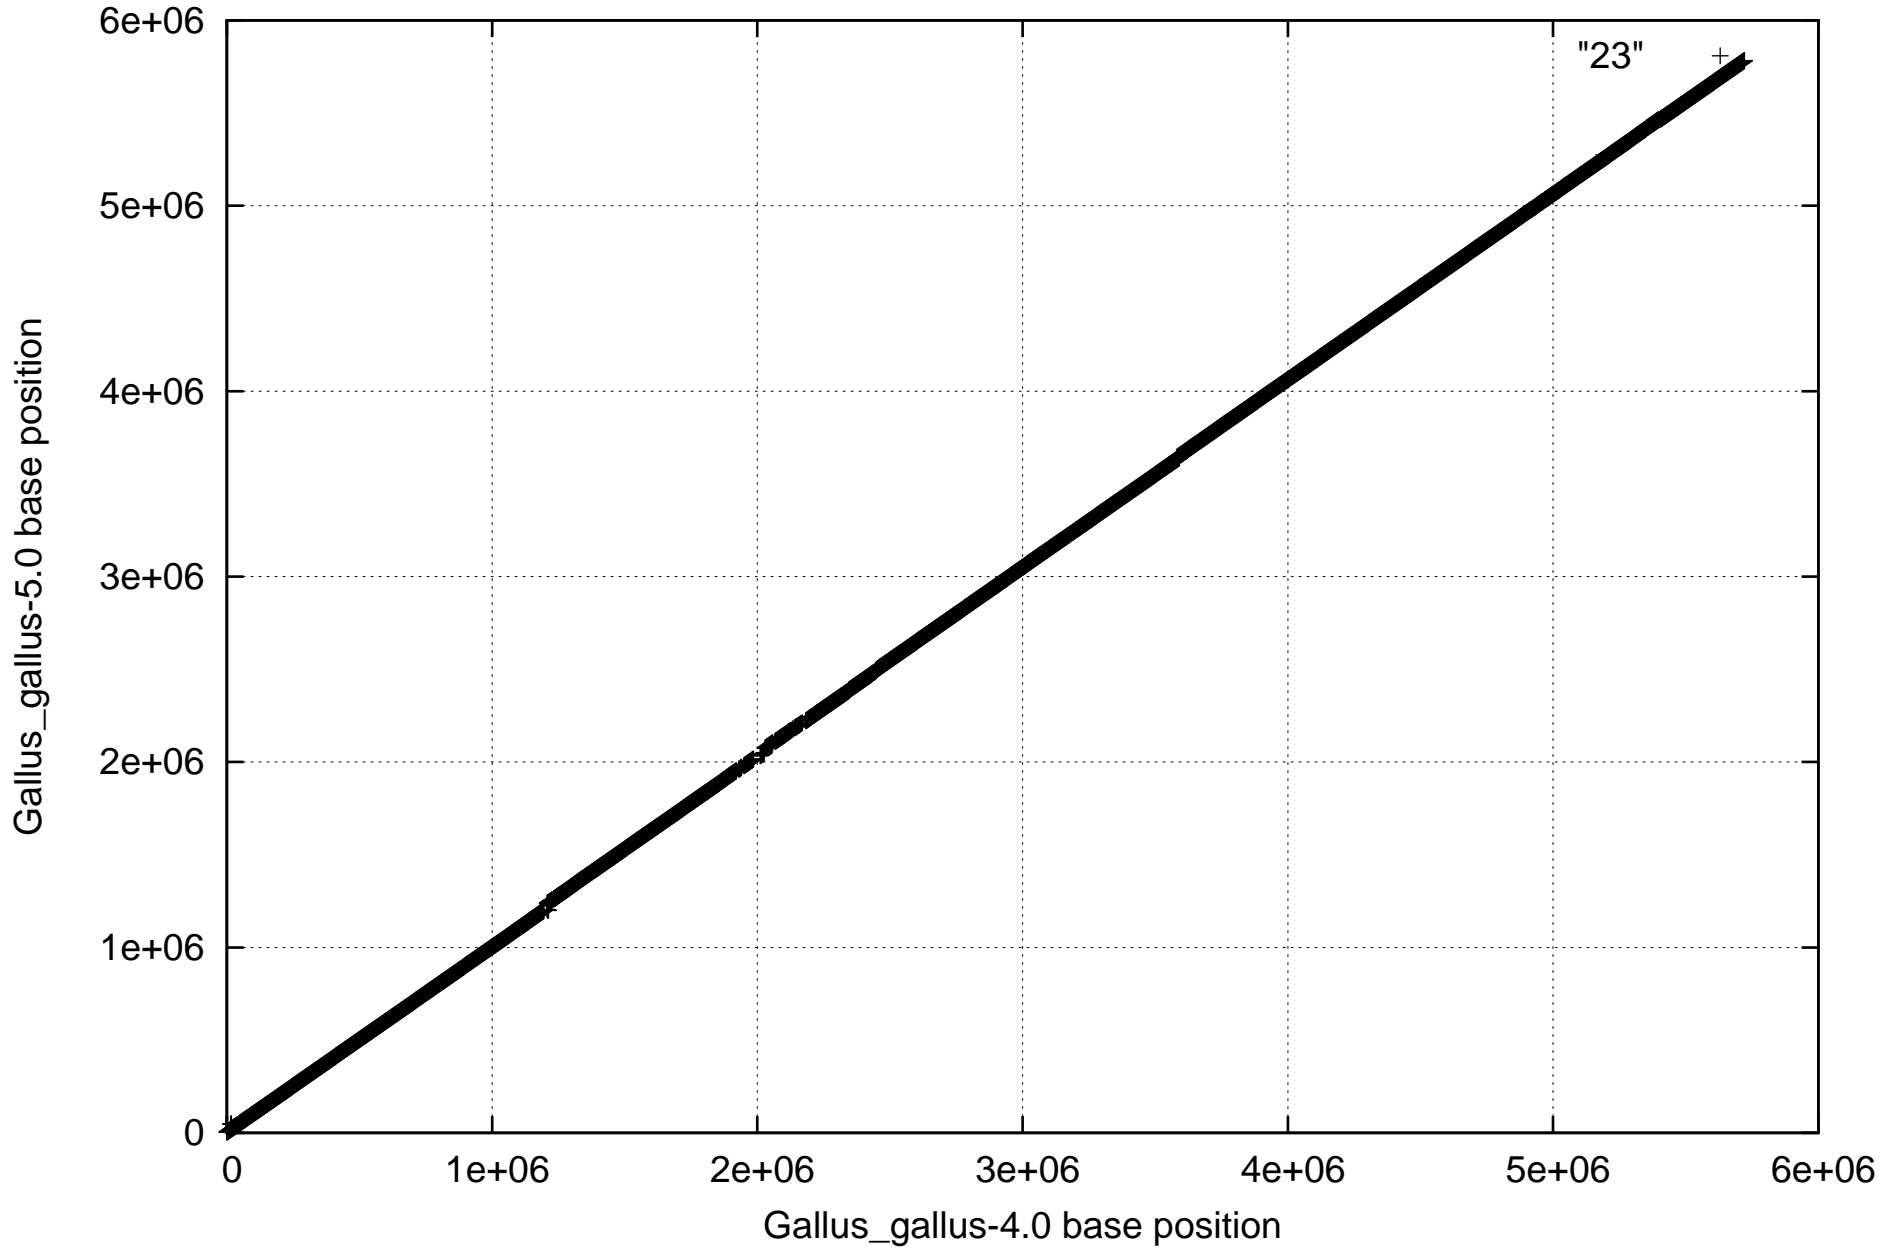

Gallus\_gallus-4.0 vs Gallus\_gallus-5.0

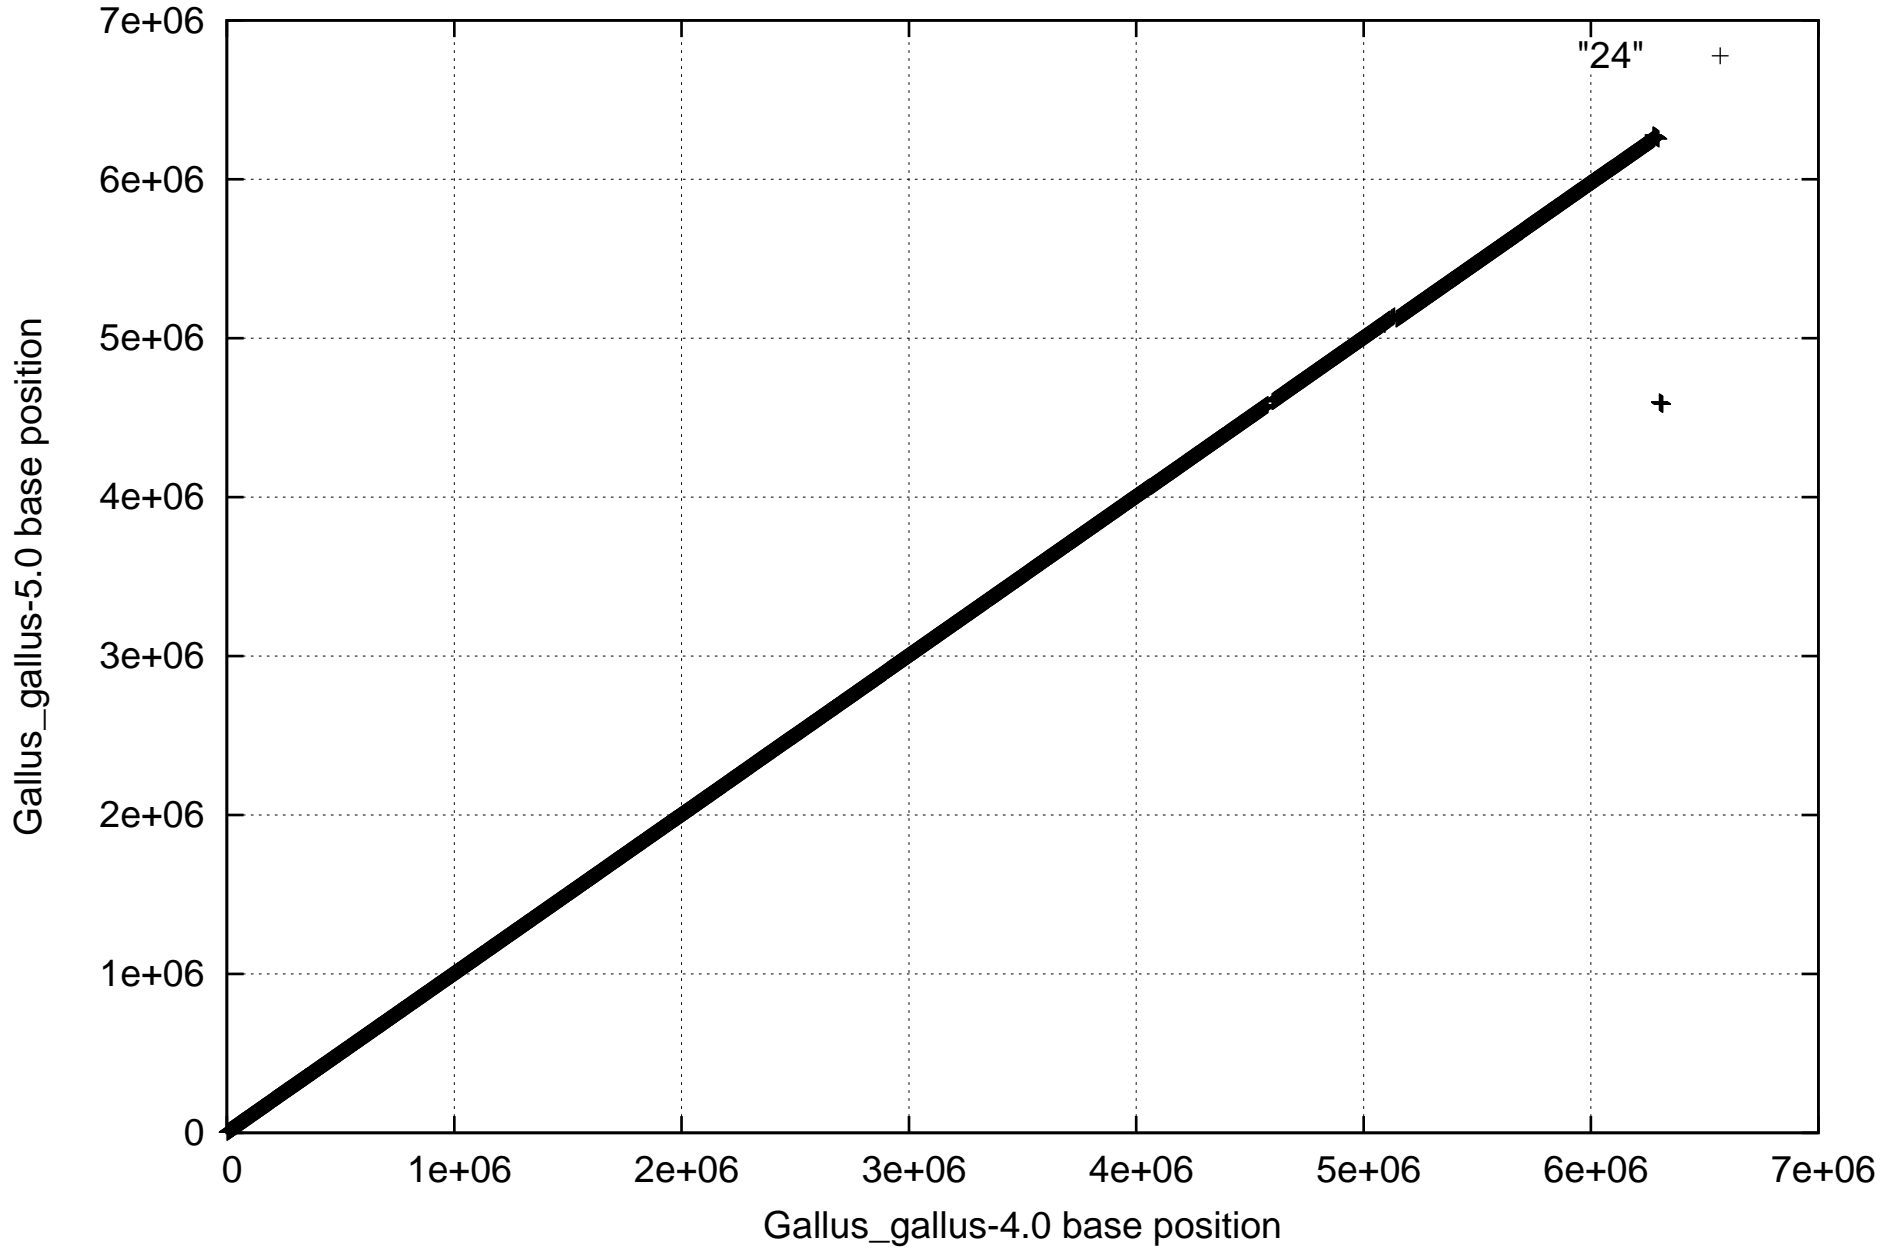



Gallus\_gallus-4.0 vs Gallus\_gallus-5.0

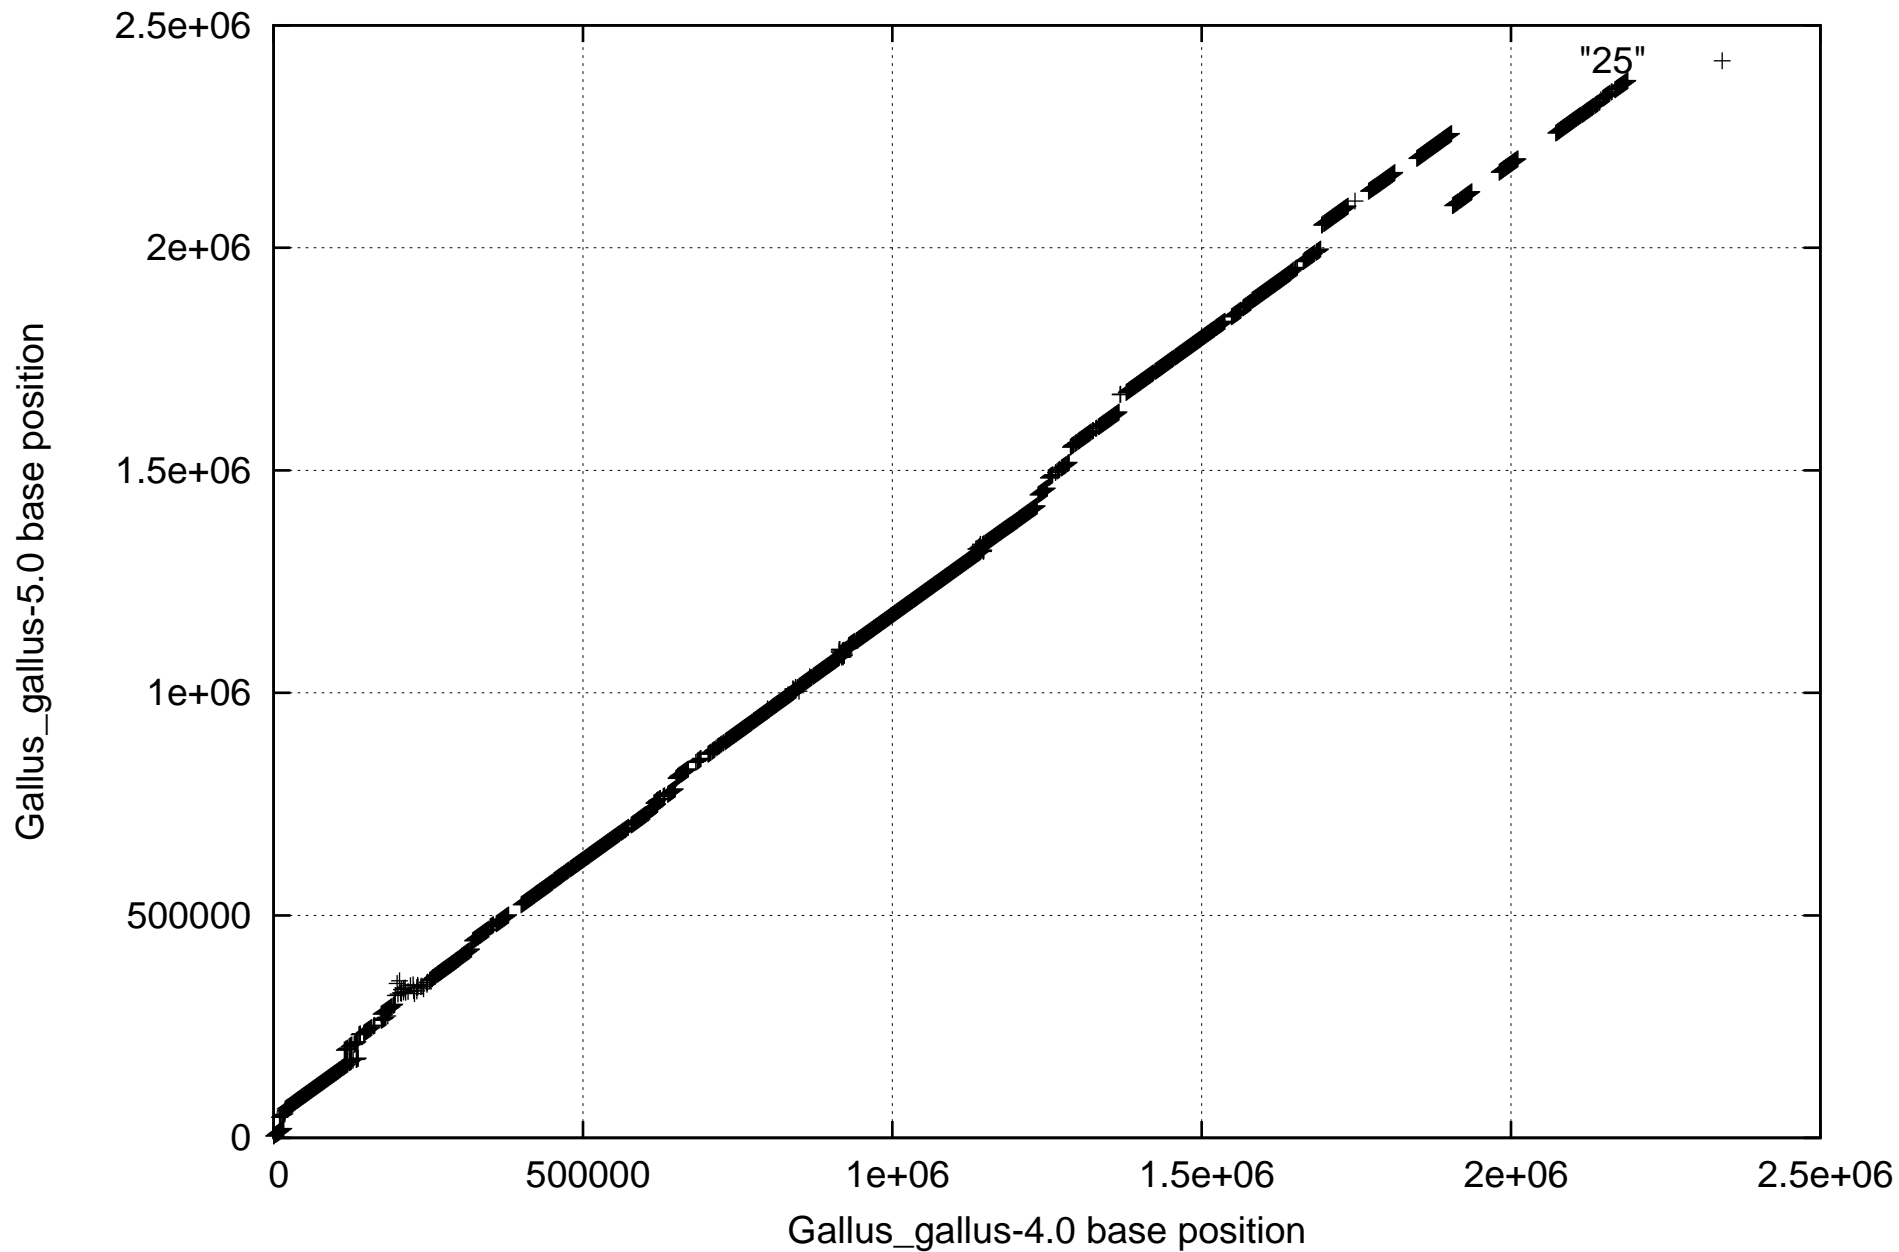

Gallus\_gallus-4.0 vs Gallus\_gallus-5.0

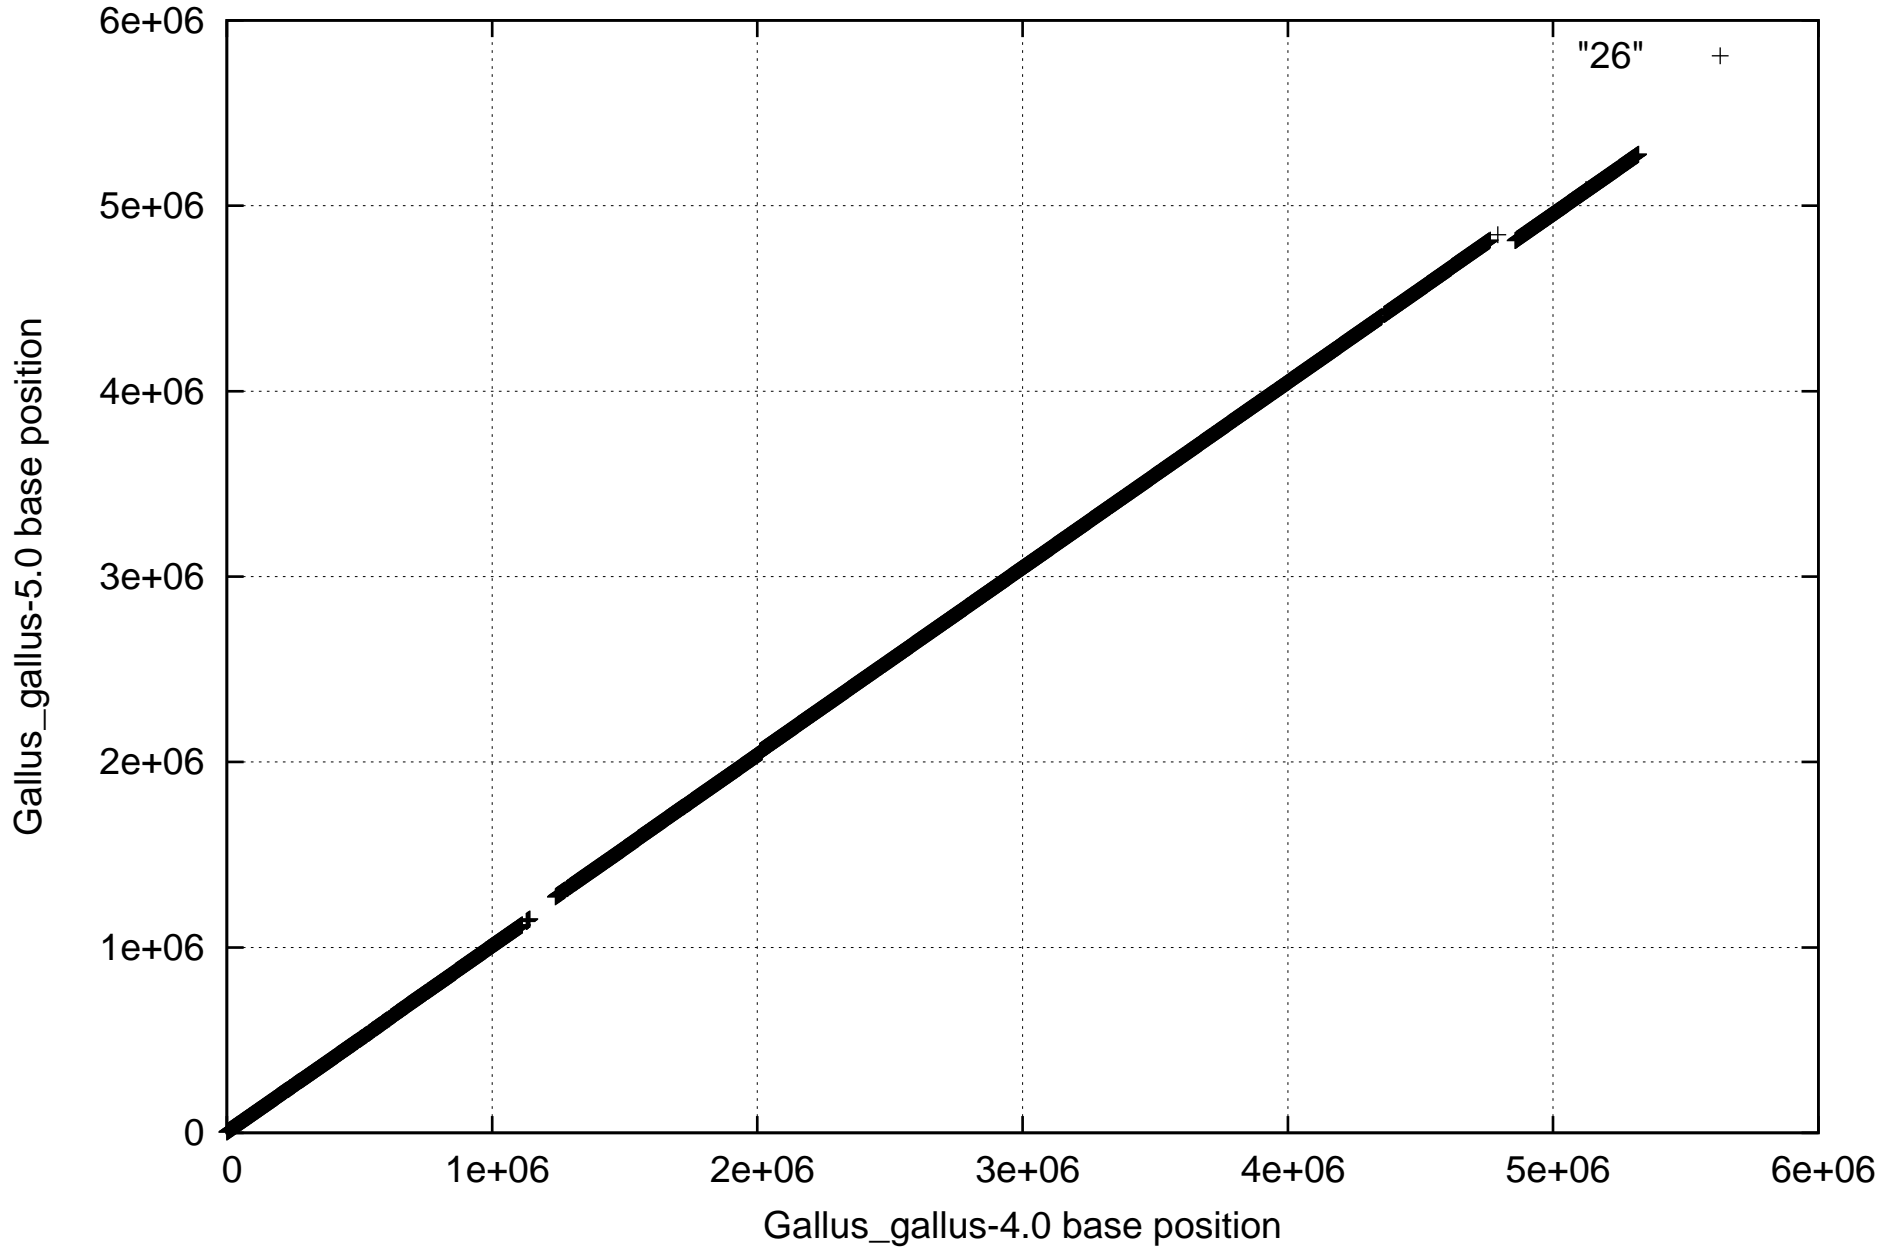

Gallus\_gallus-4.0 vs Gallus\_gallus-5.0

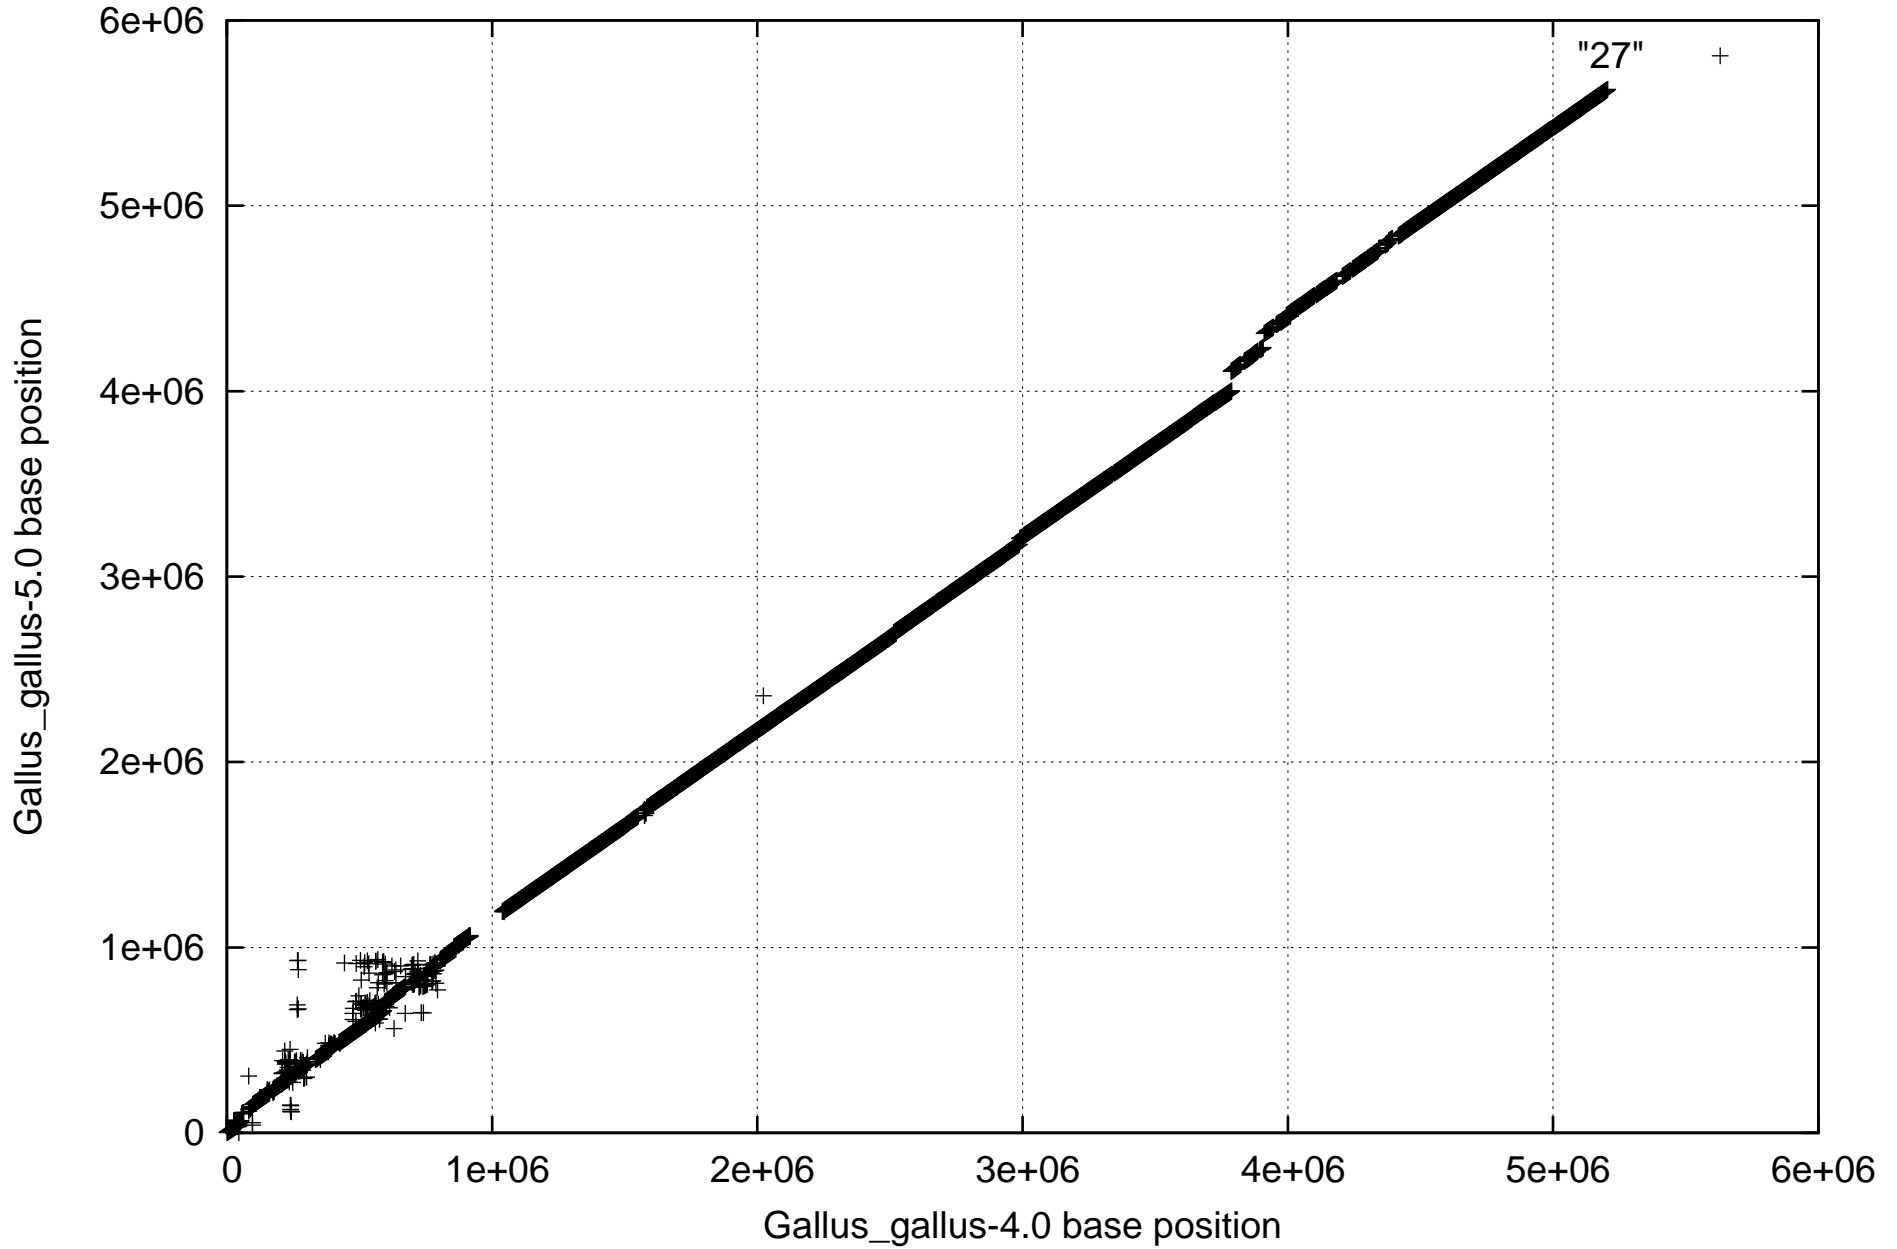

Gallus\_gallus-4.0 vs Gallus\_gallus-5.0

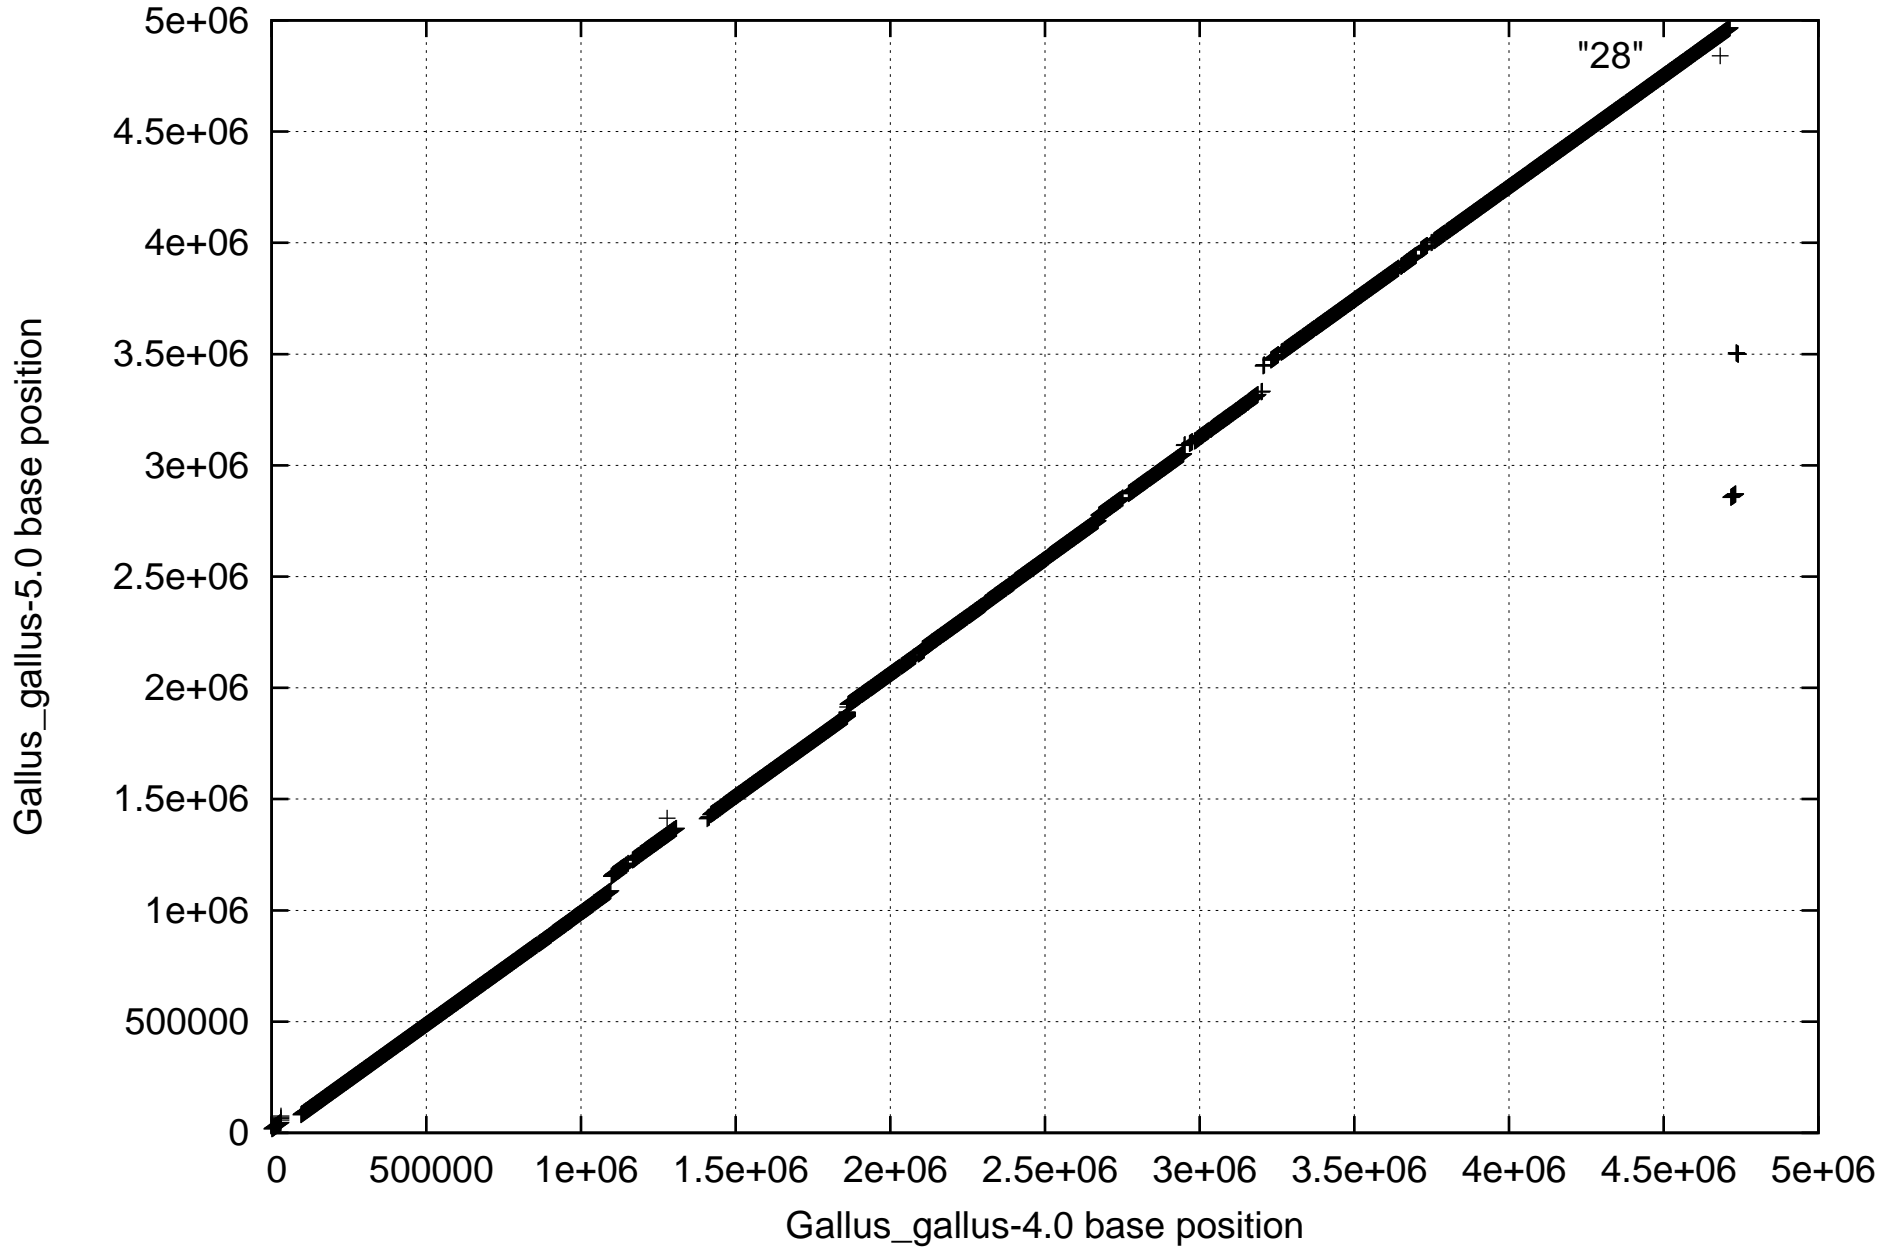

Gallus\_gallus-4.0 vs Gallus\_gallus-5.0

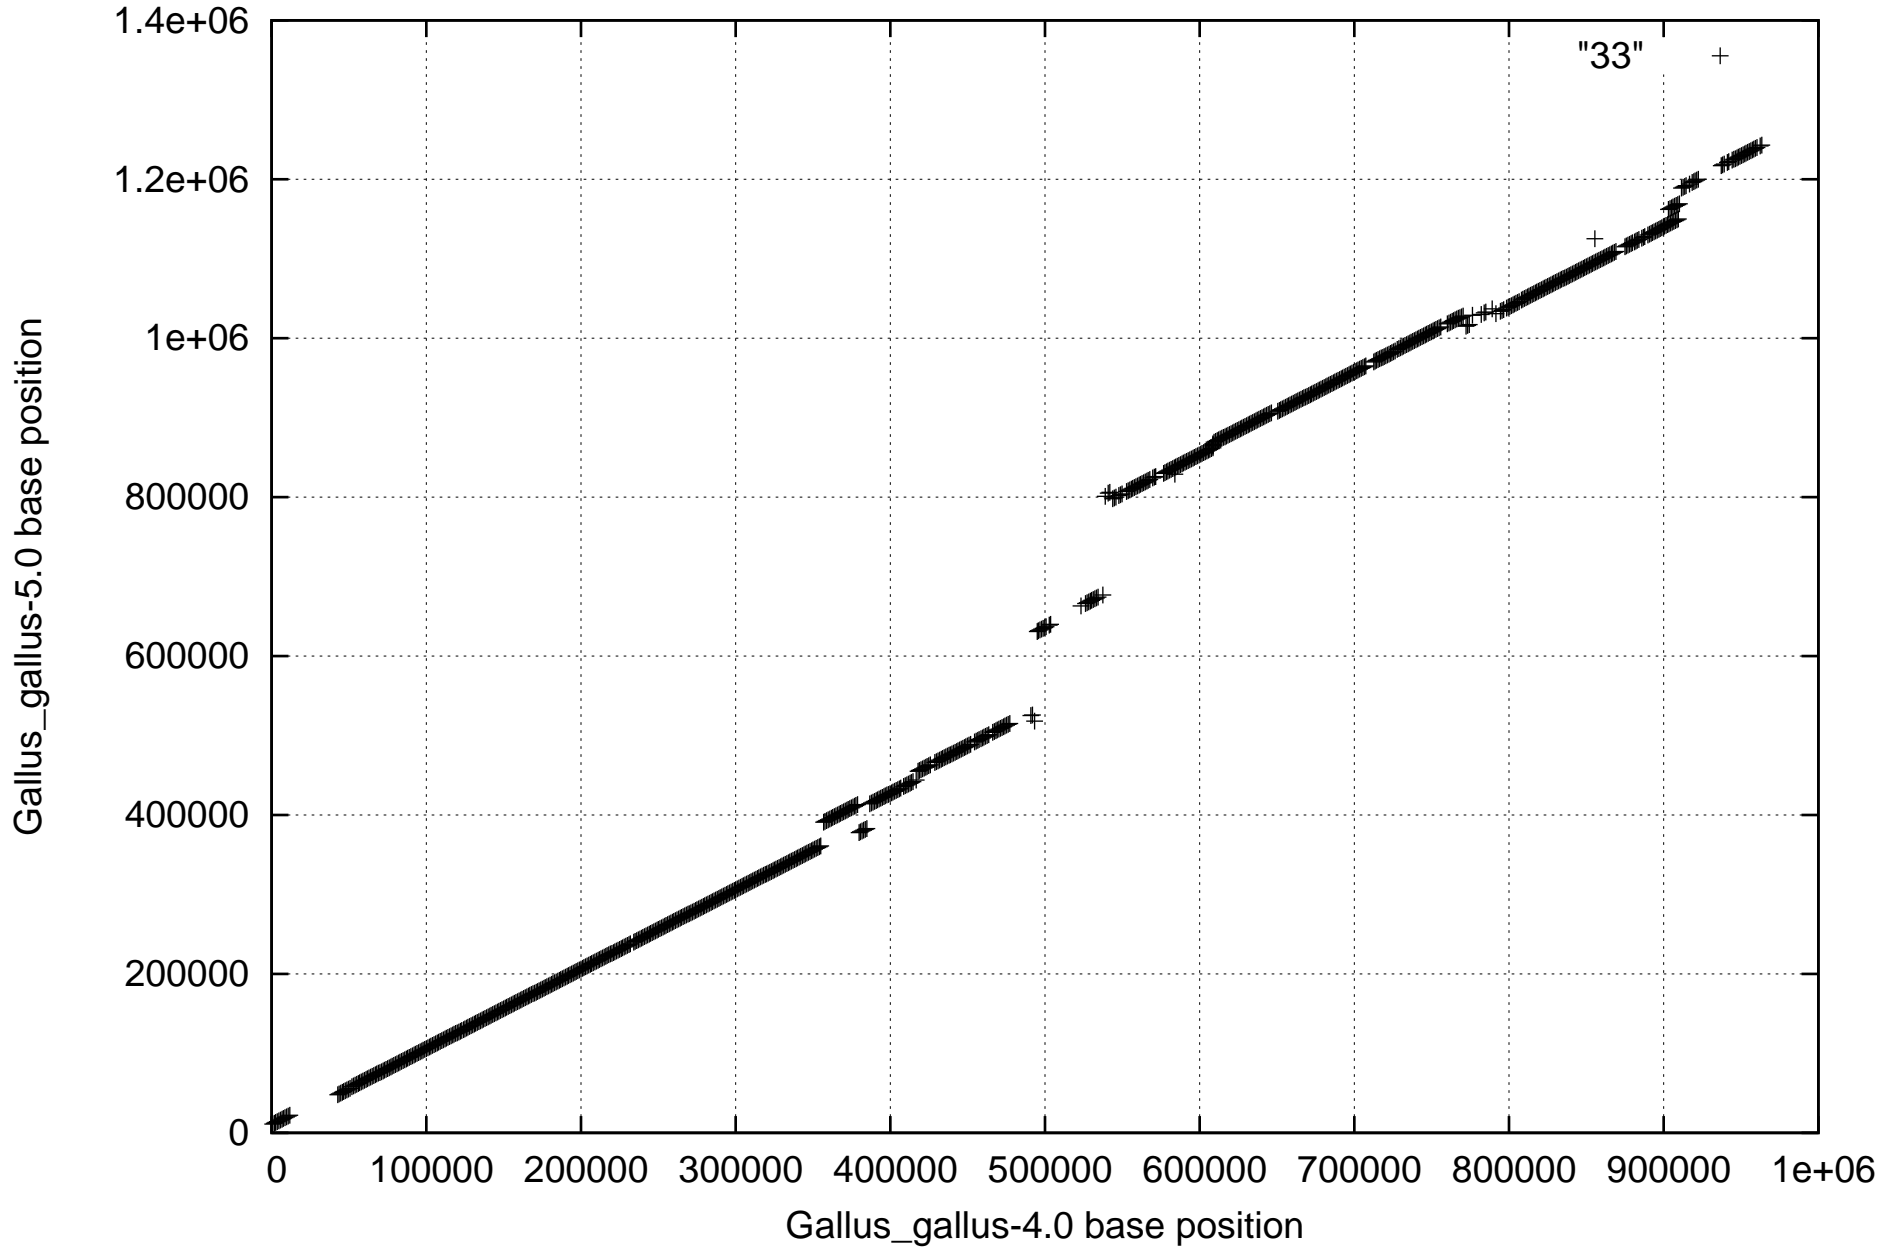

Gallus\_gallus-4.0 vs Gallus\_gallus-5.0

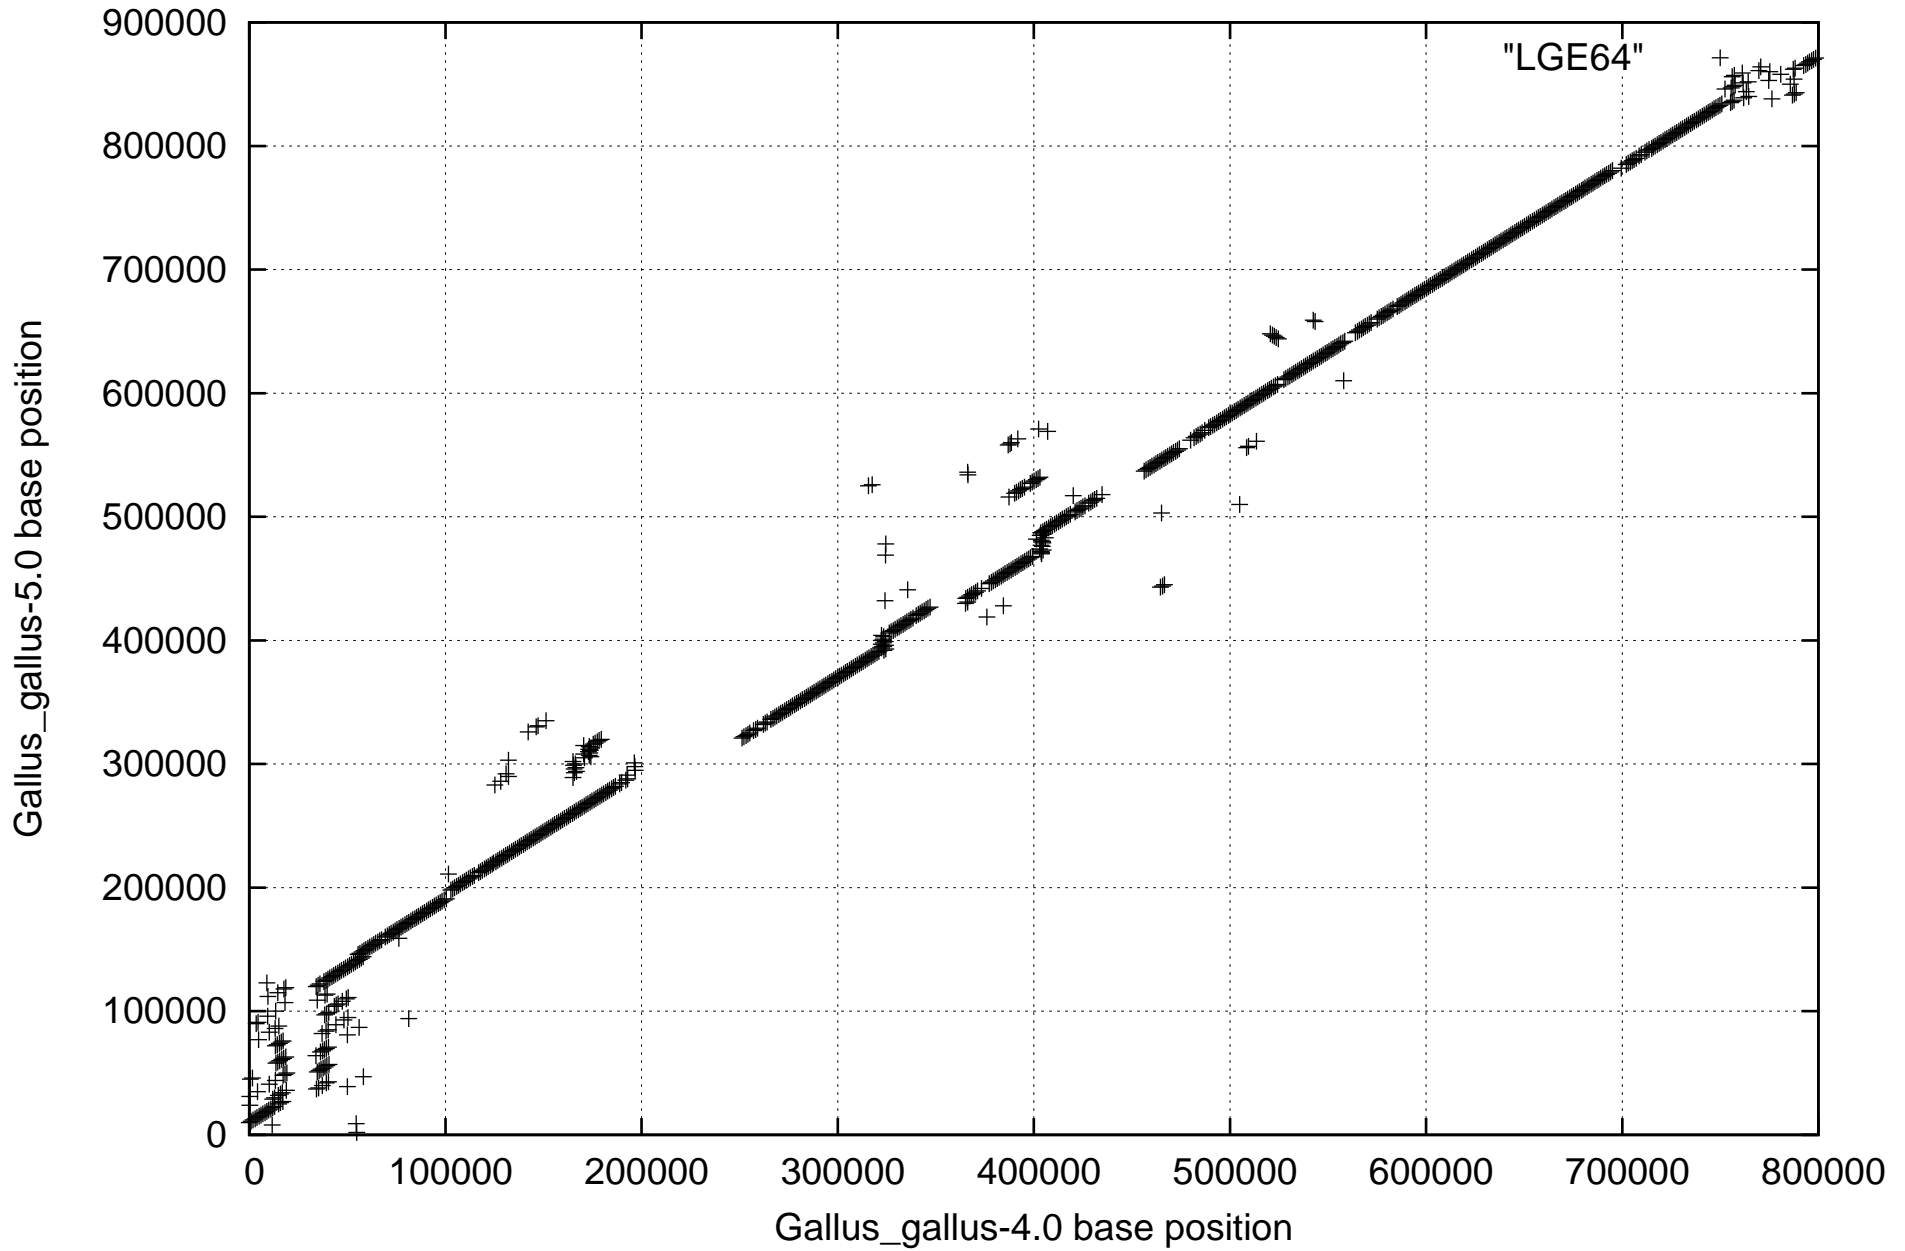

Supplement: 109FileS2.pdf [file 109FileS2.pdf]
