# Supplementary material for: A New Chicken Genome Assembly Provides Insight into Avian Genome Structure
Source: PubMed Central journal article supplement (PMC5217101; doi:10.1534/g3.116.035923), 2016-11-14

galGal5 recombination

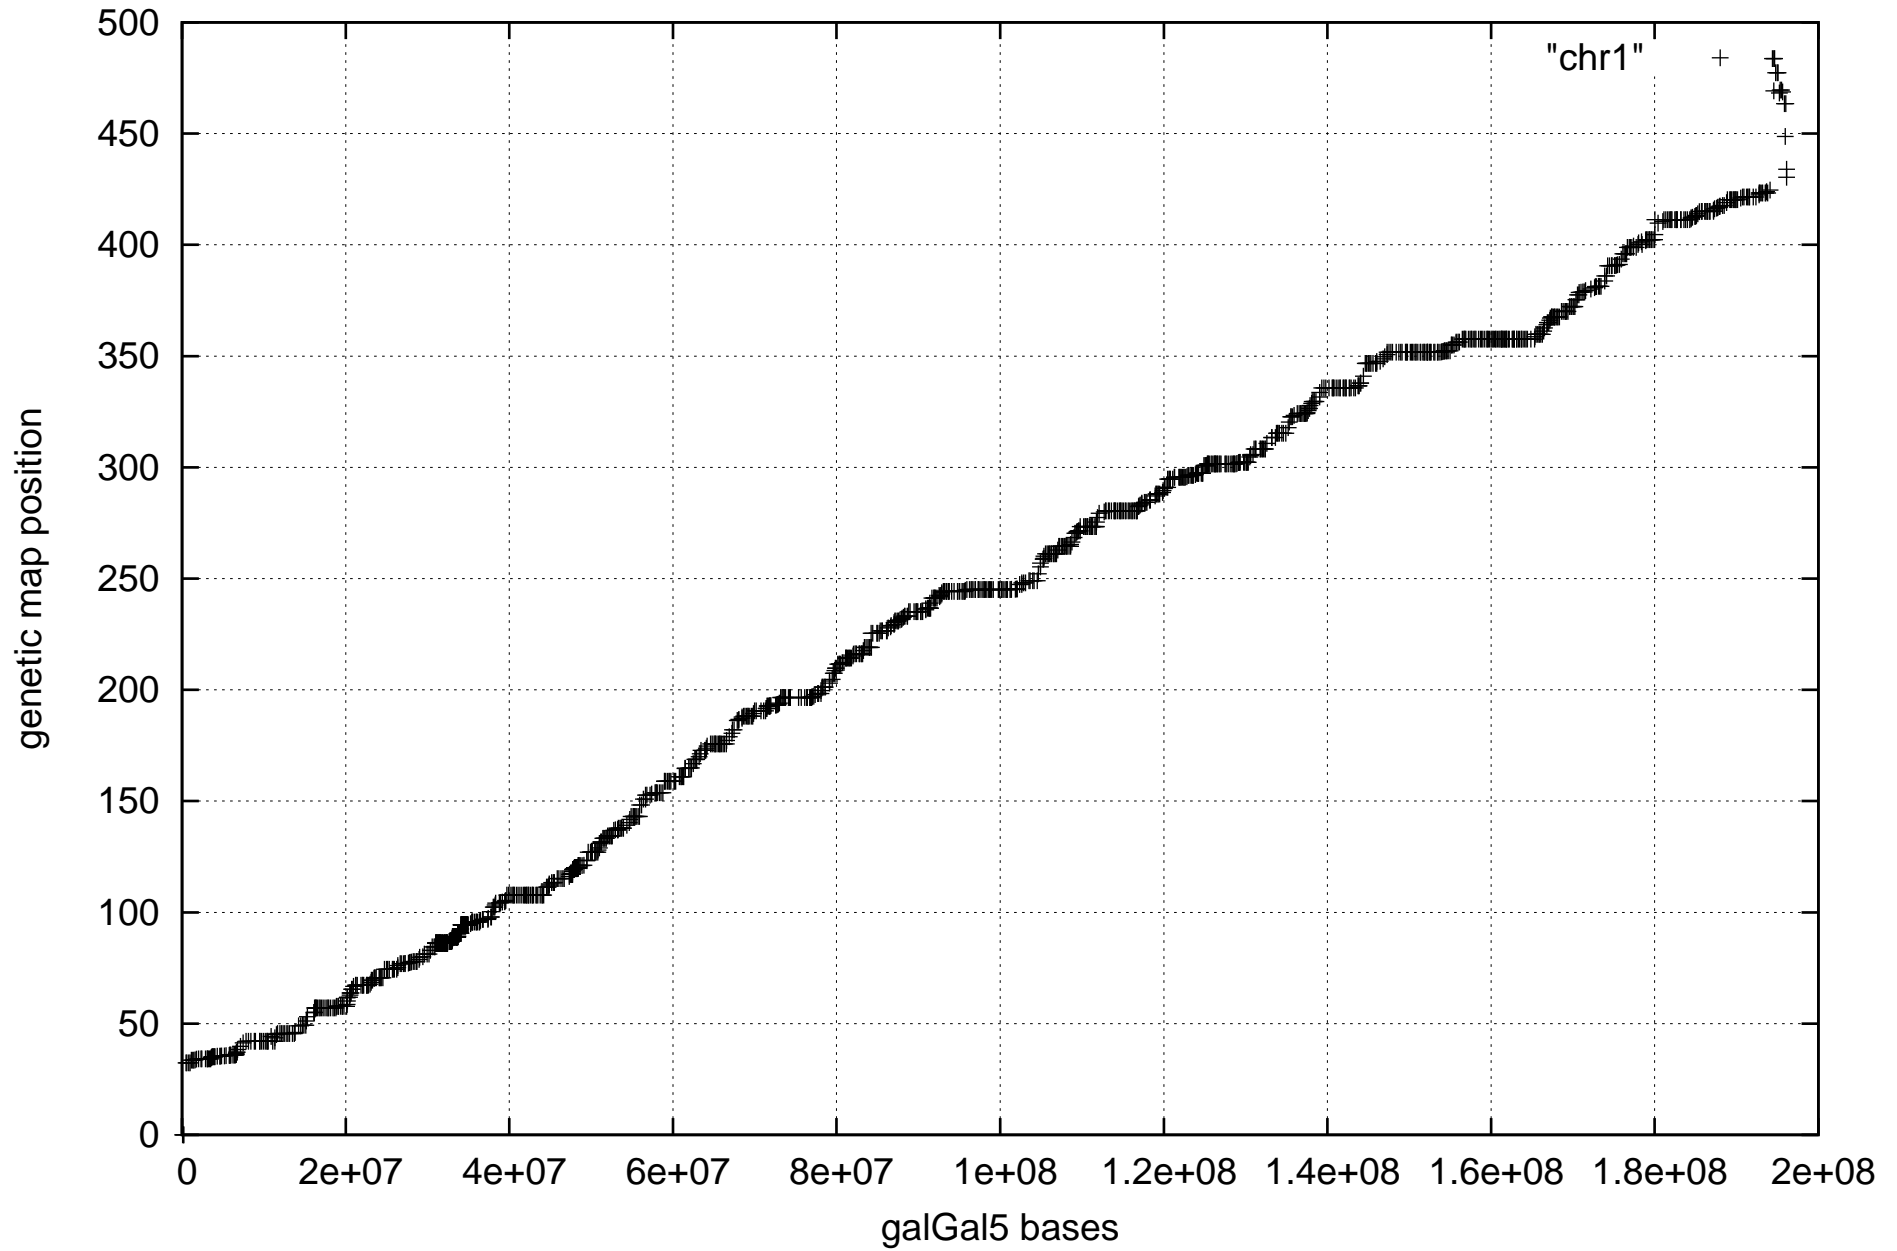

galGal5 recombination

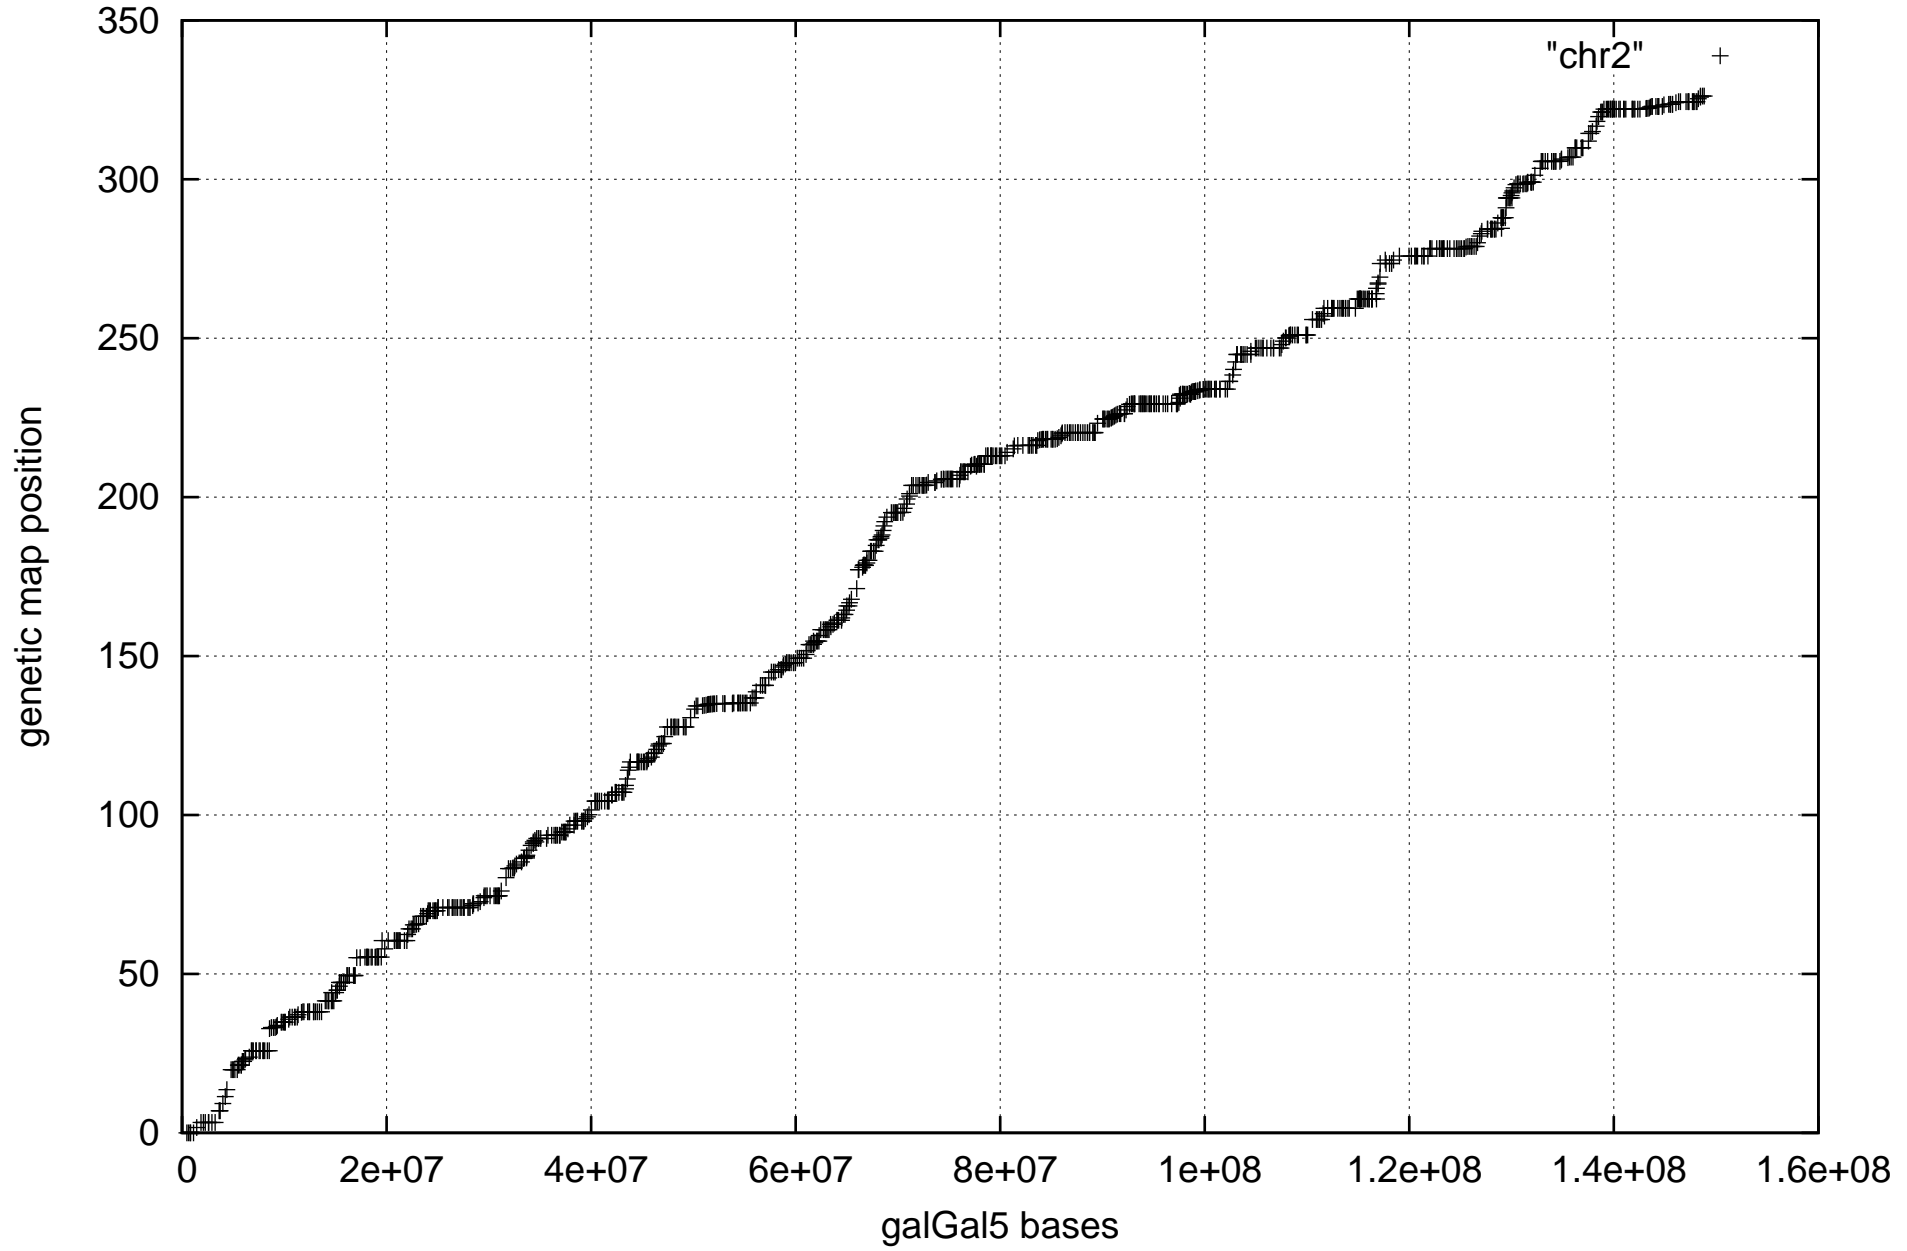

galGal5 recombination

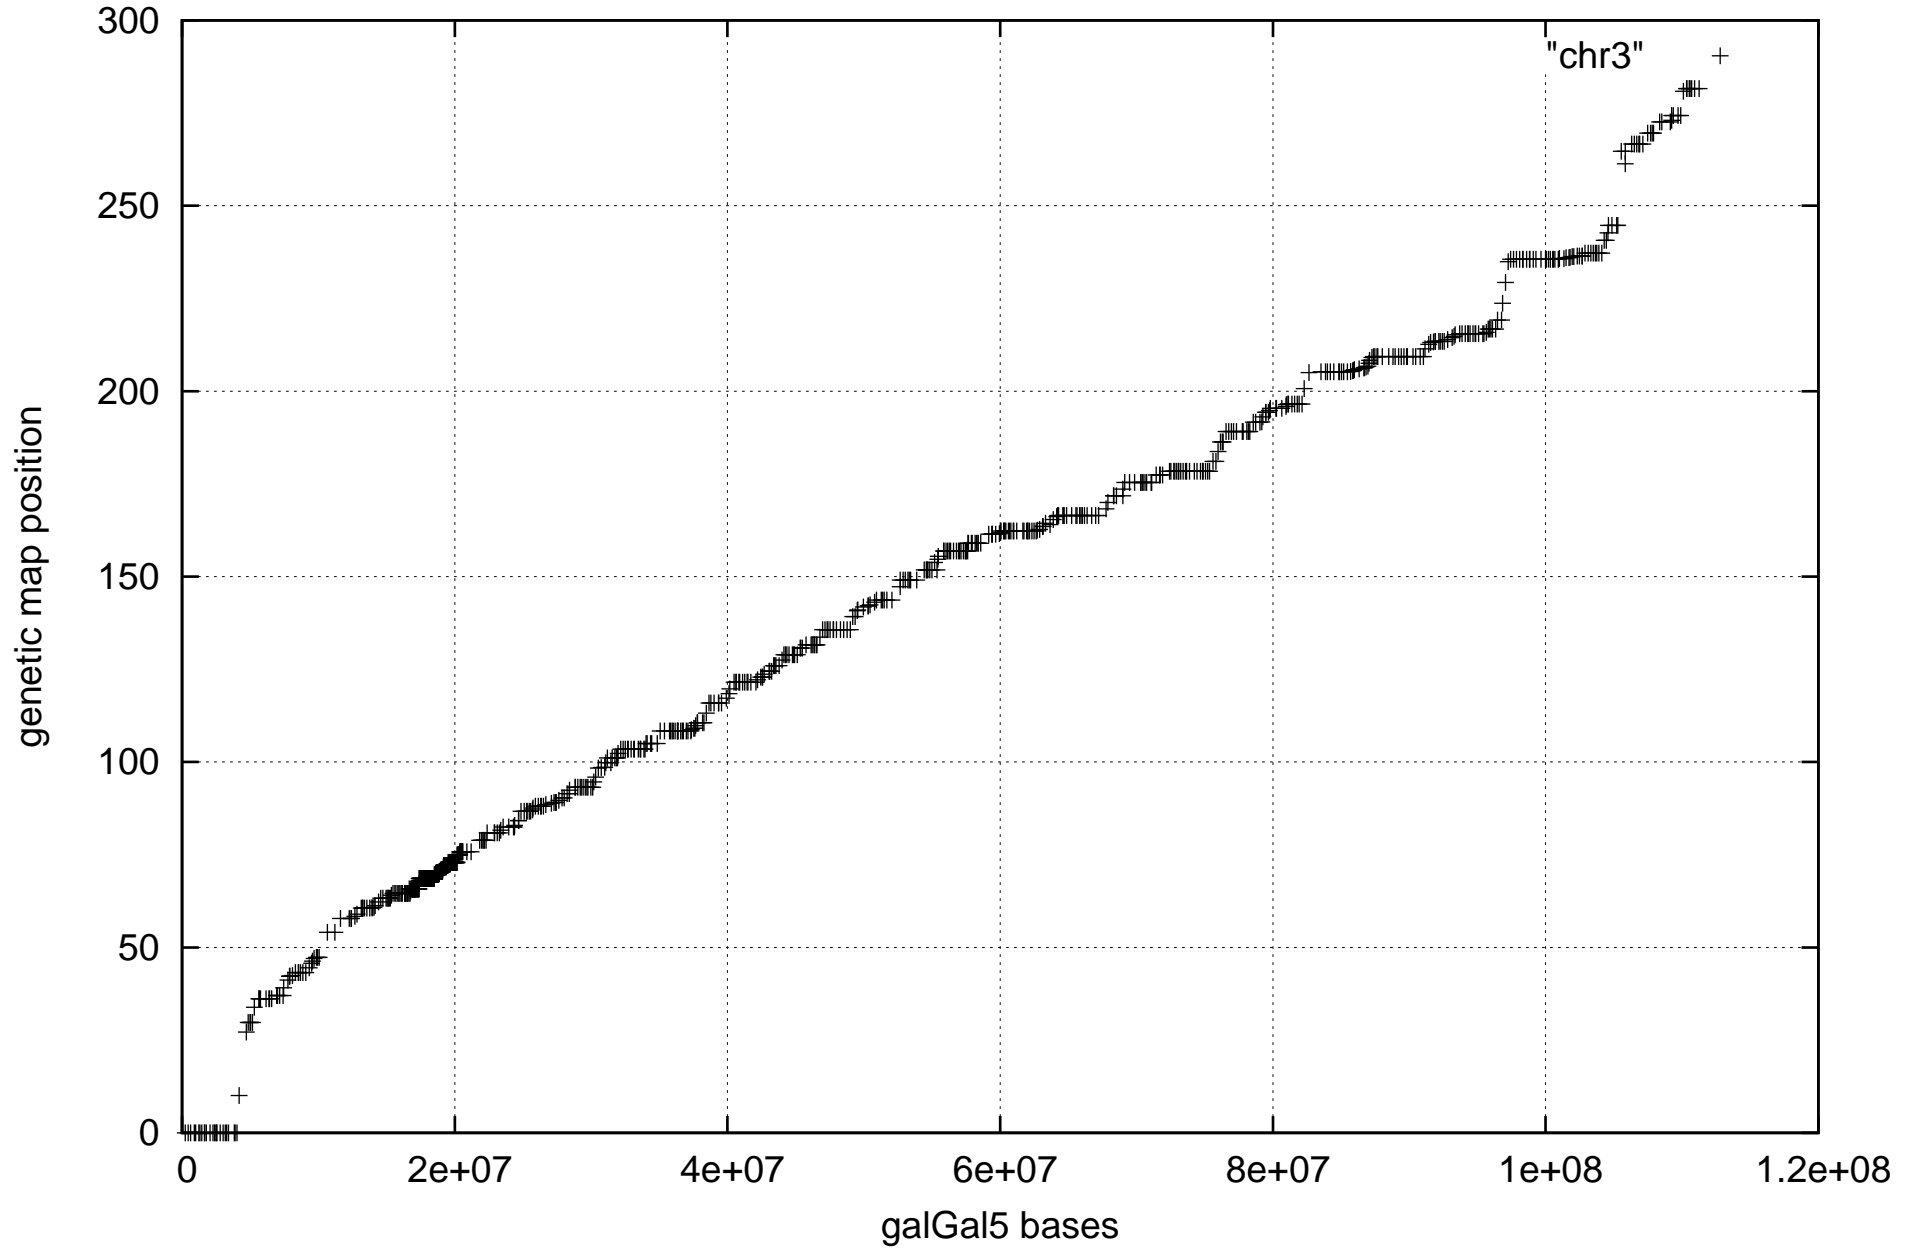

galGal5 recombination

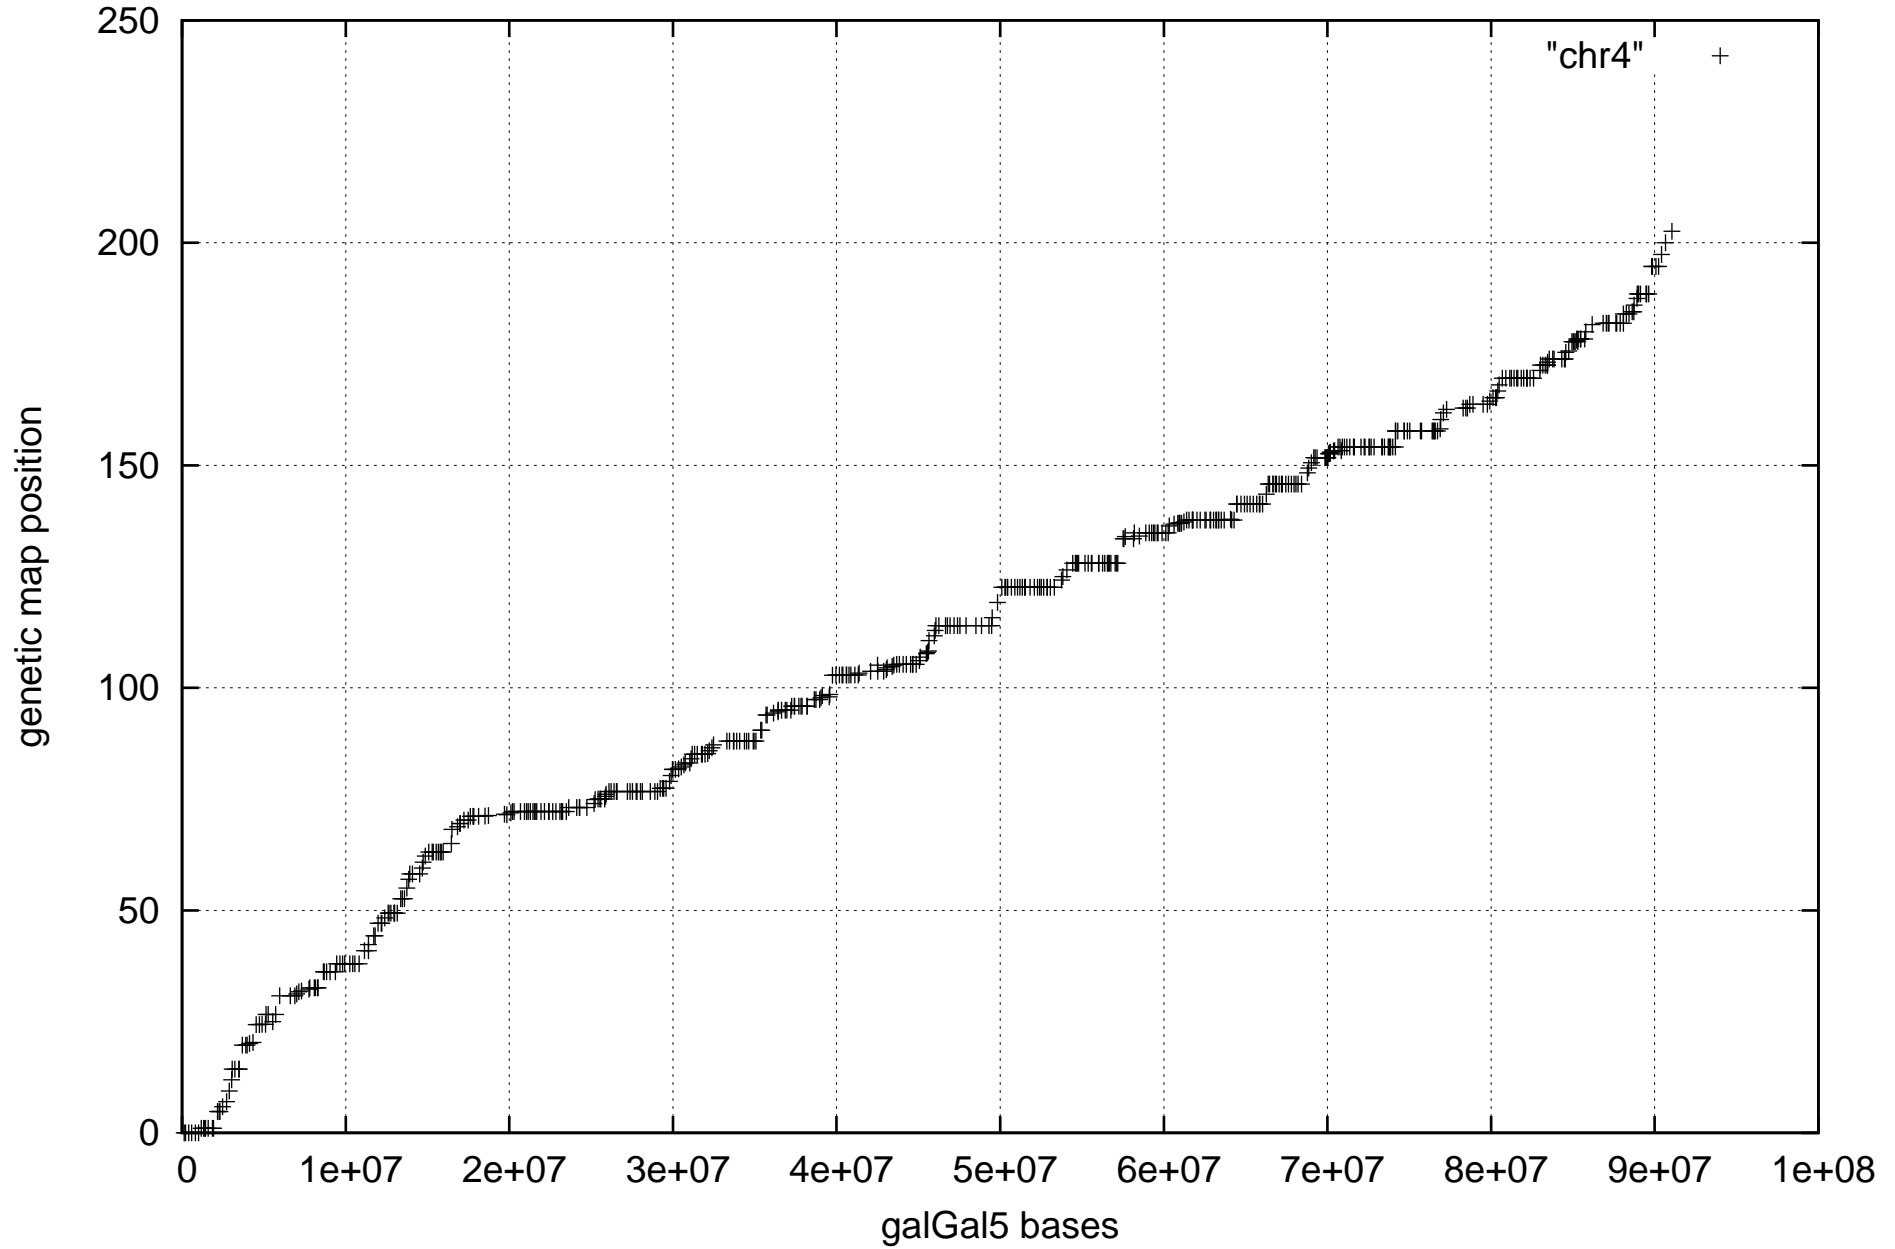

galGal5 recombination

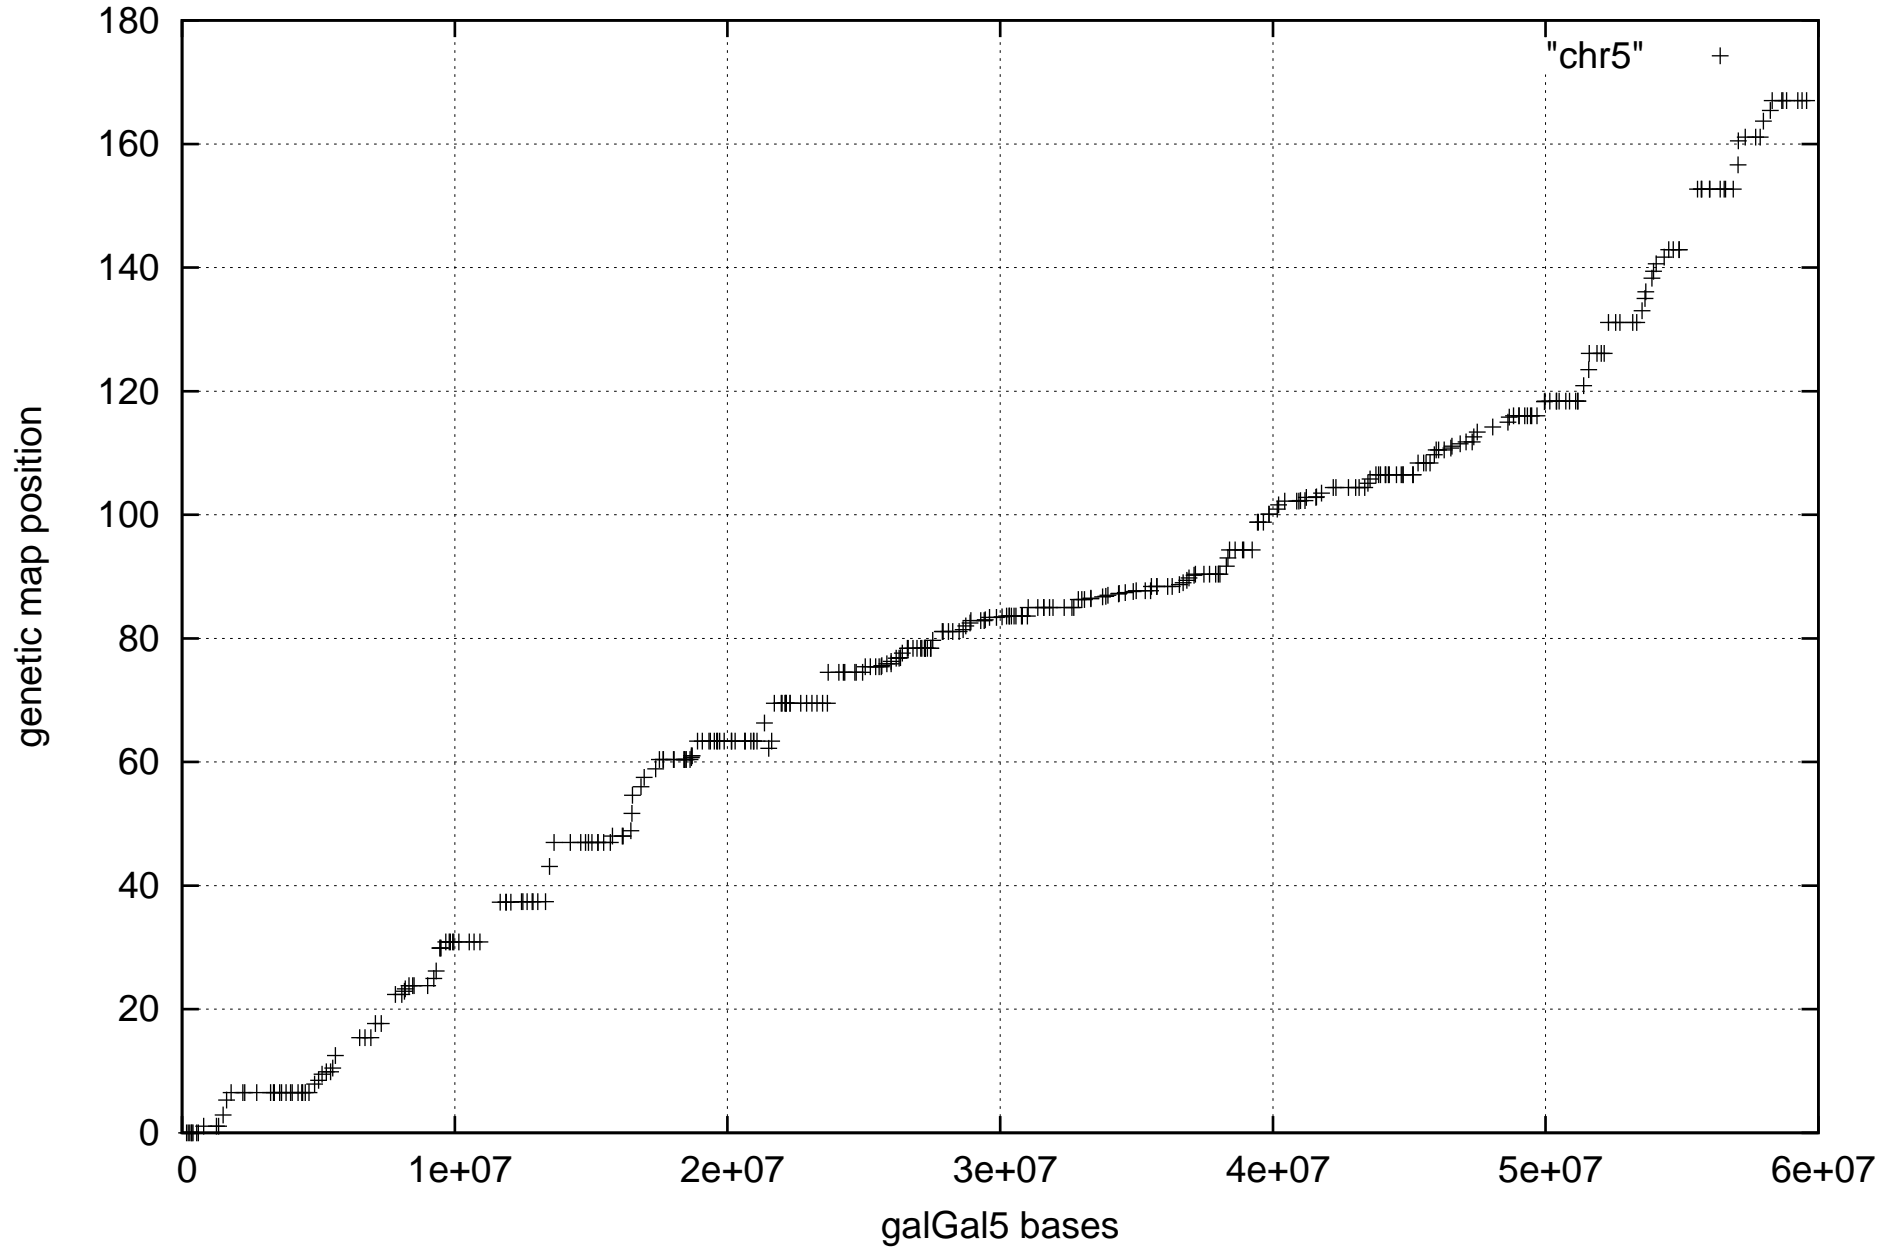

galGal5 recombination

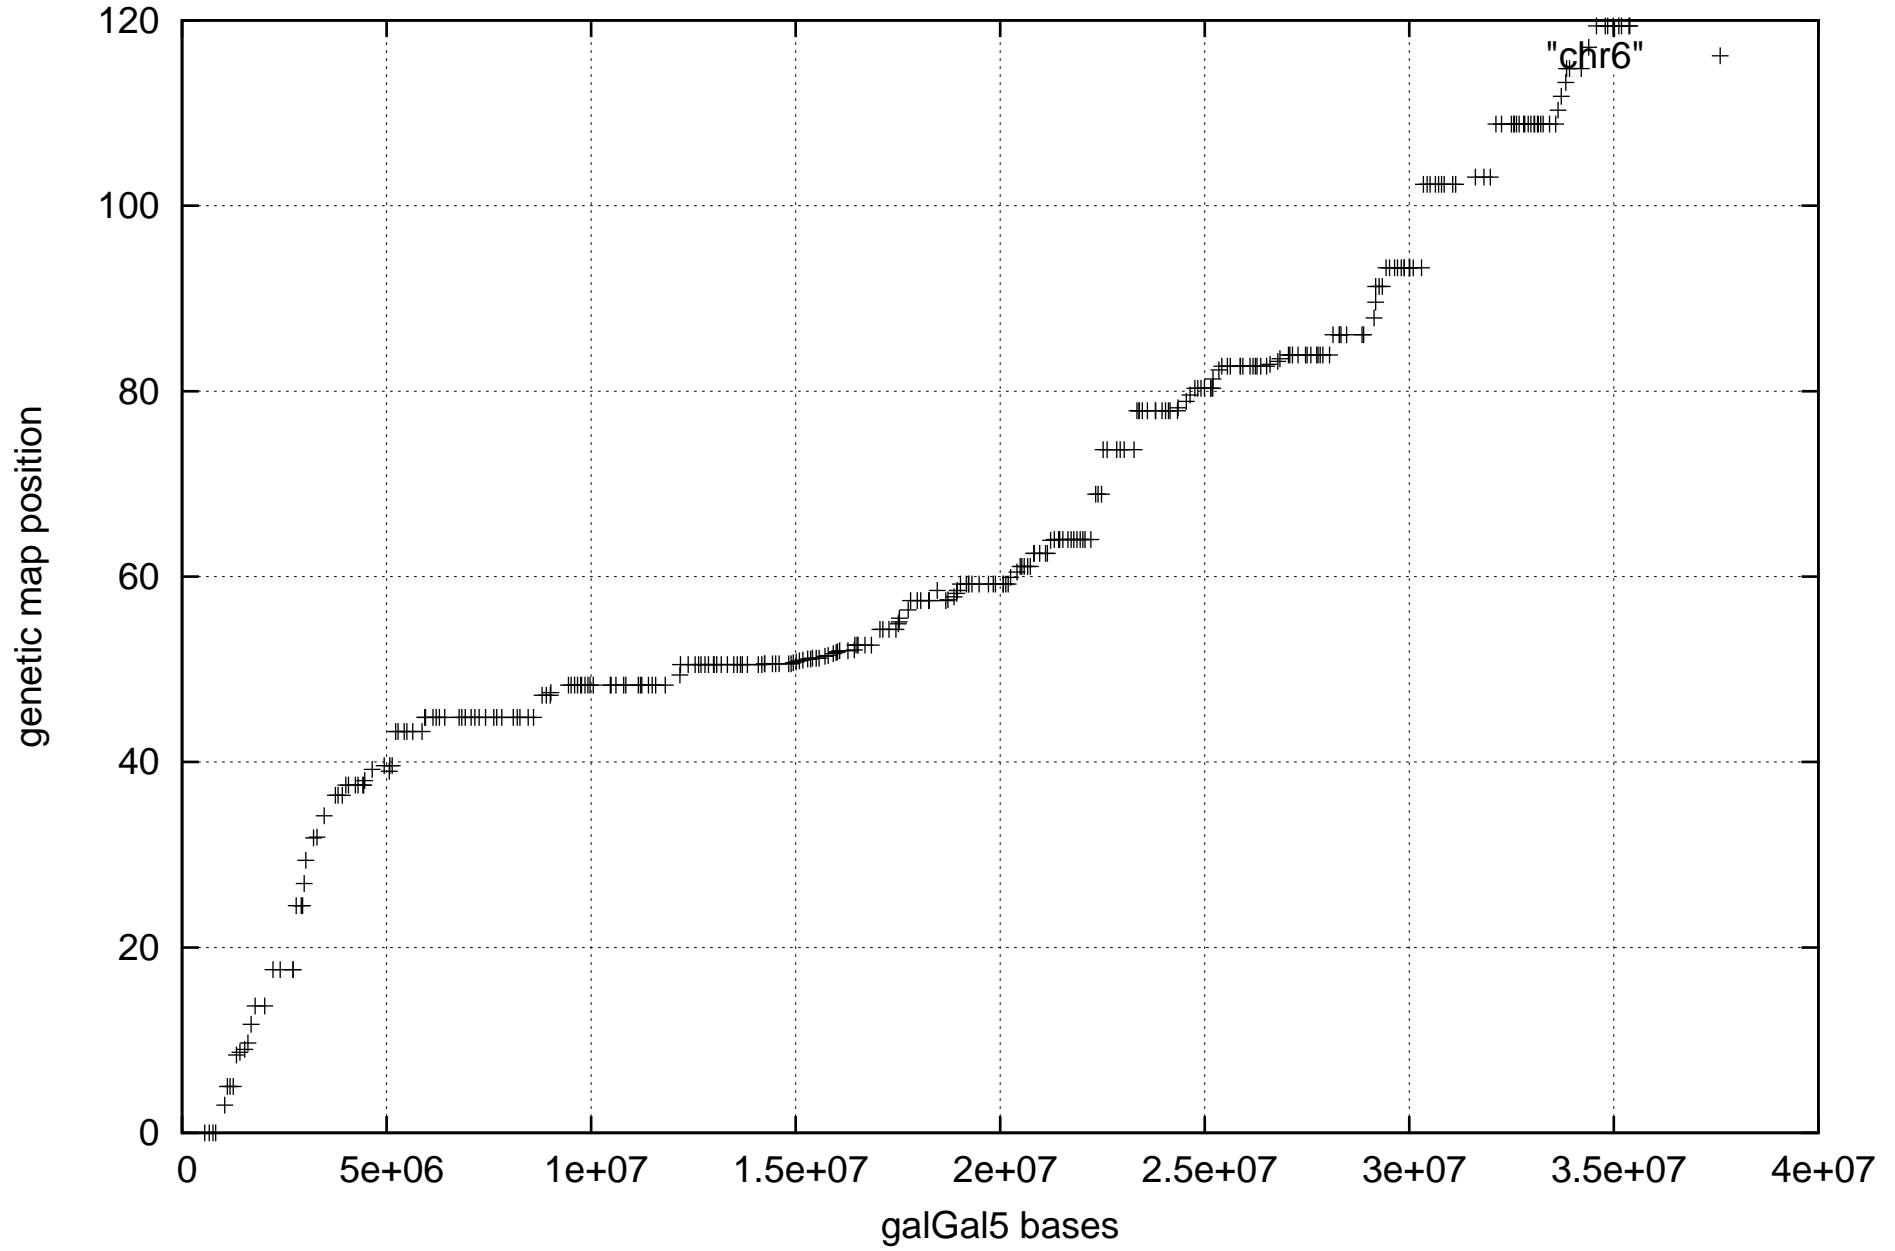

galGal5 recombination

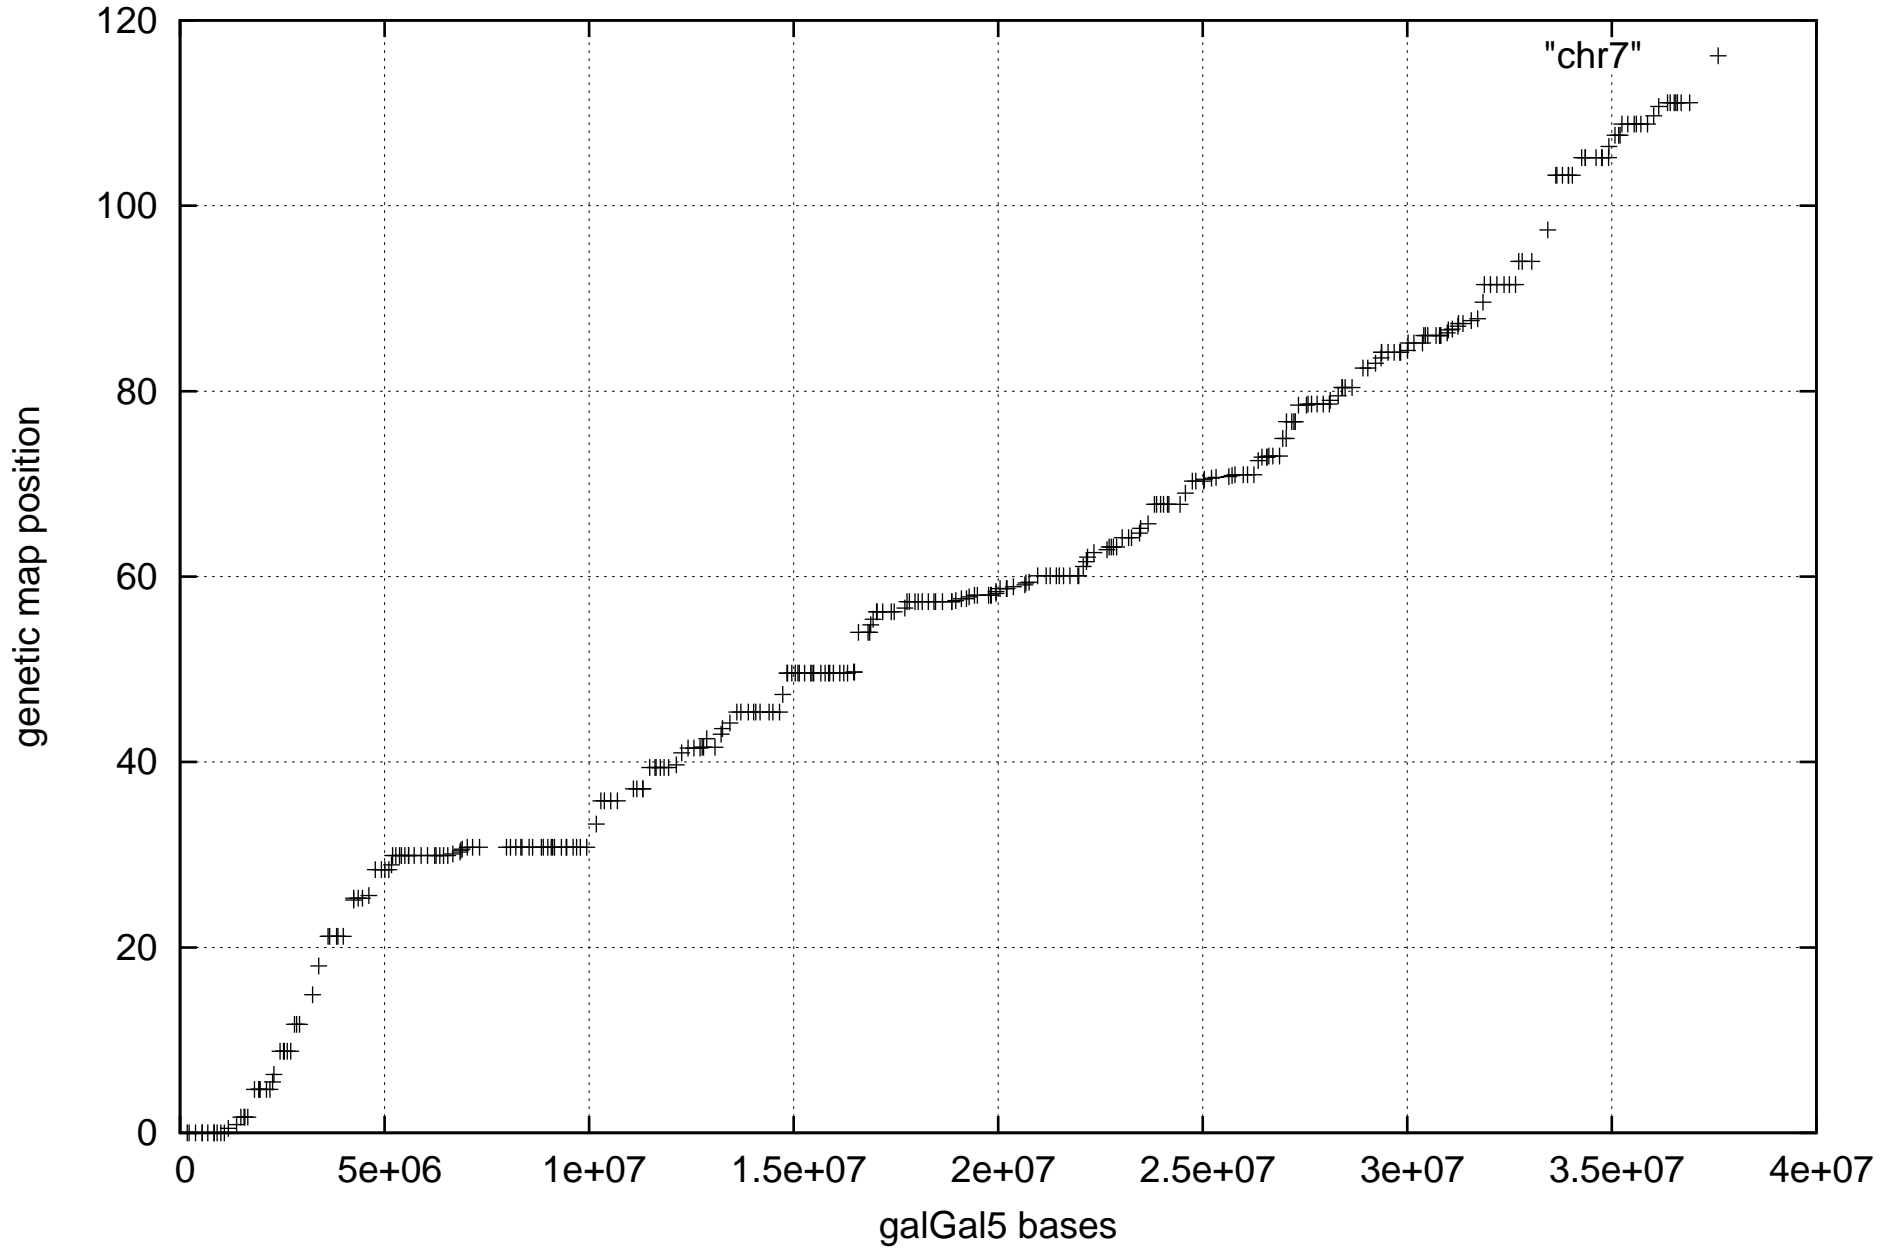

# galGal5 recombination

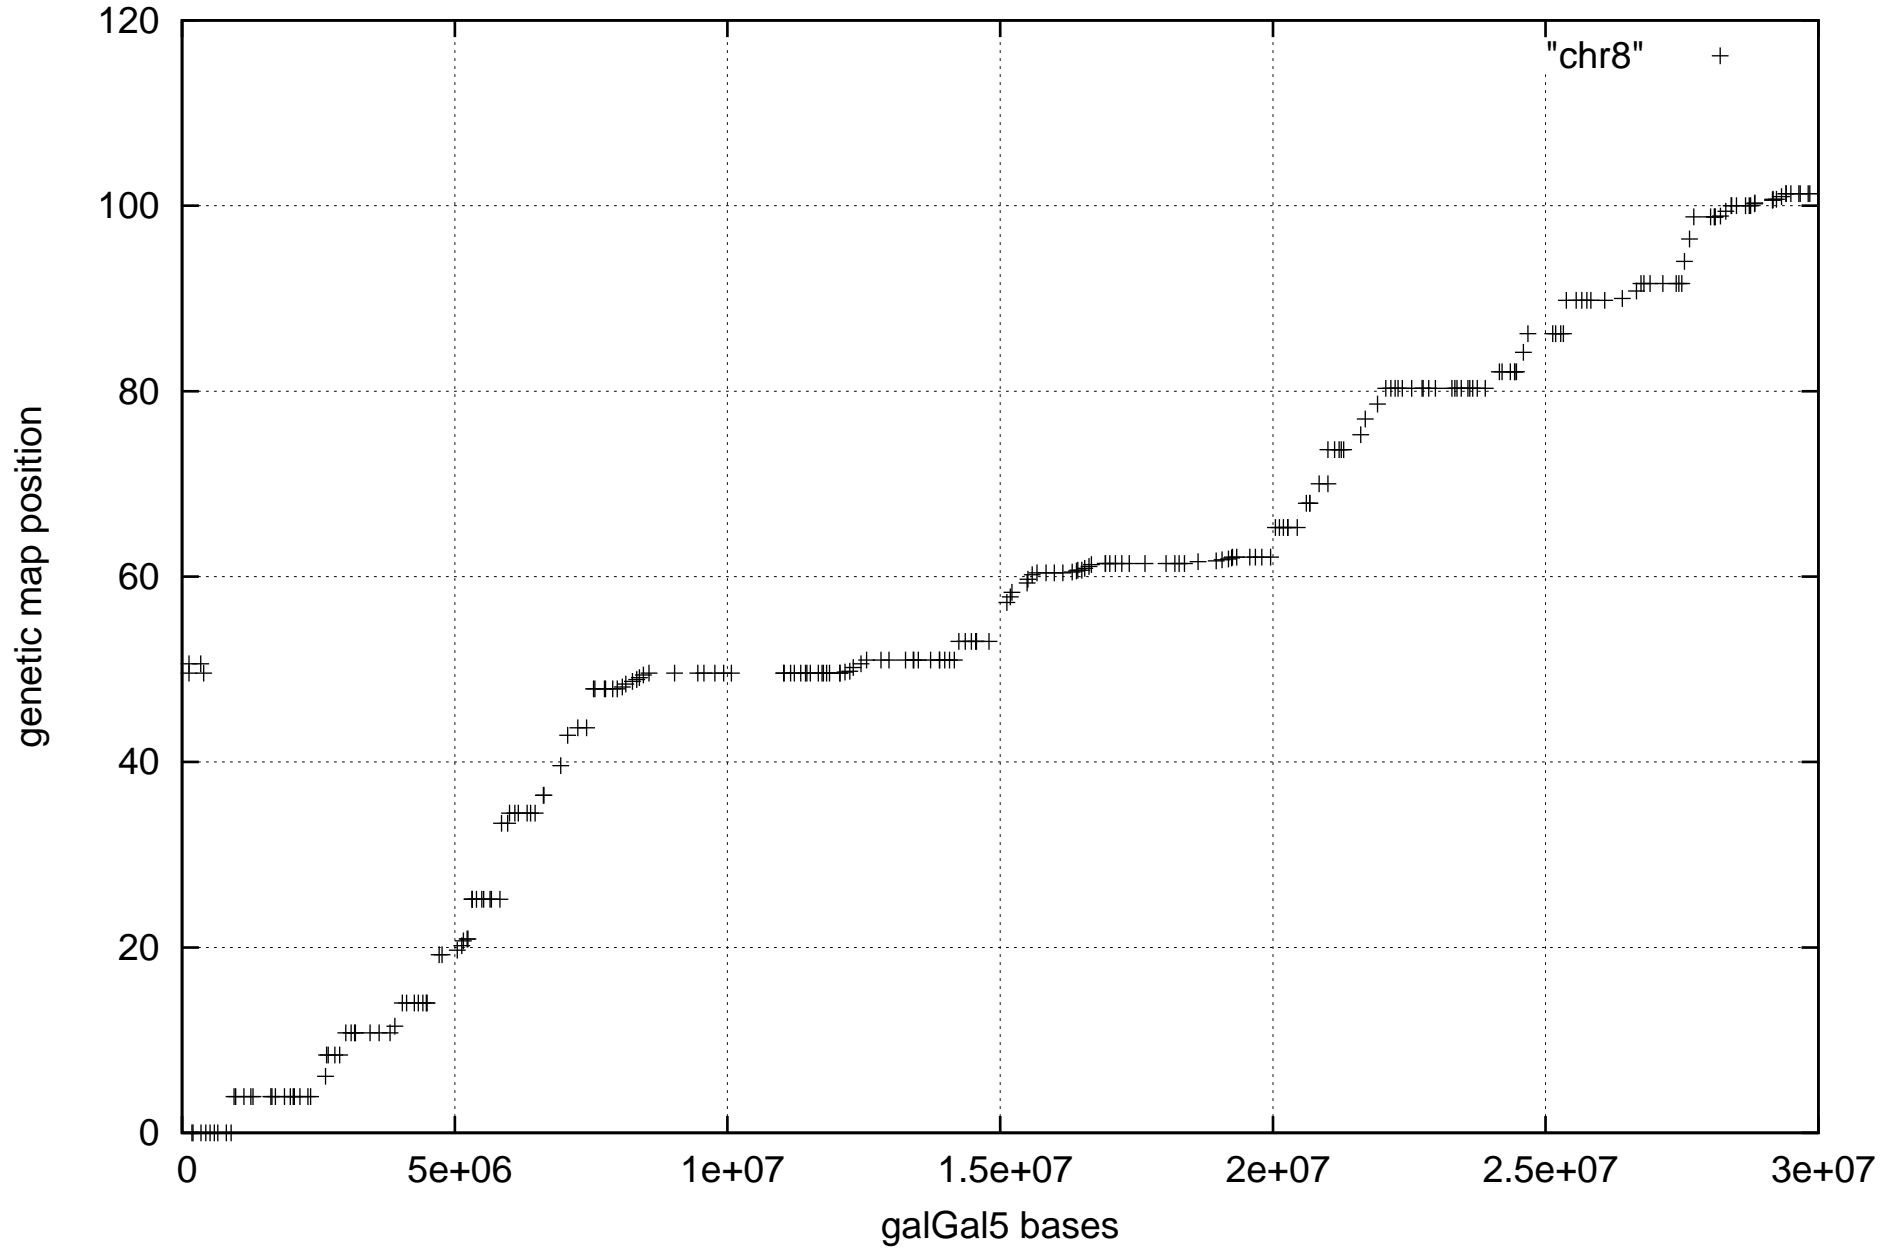



# galGal5 recombination

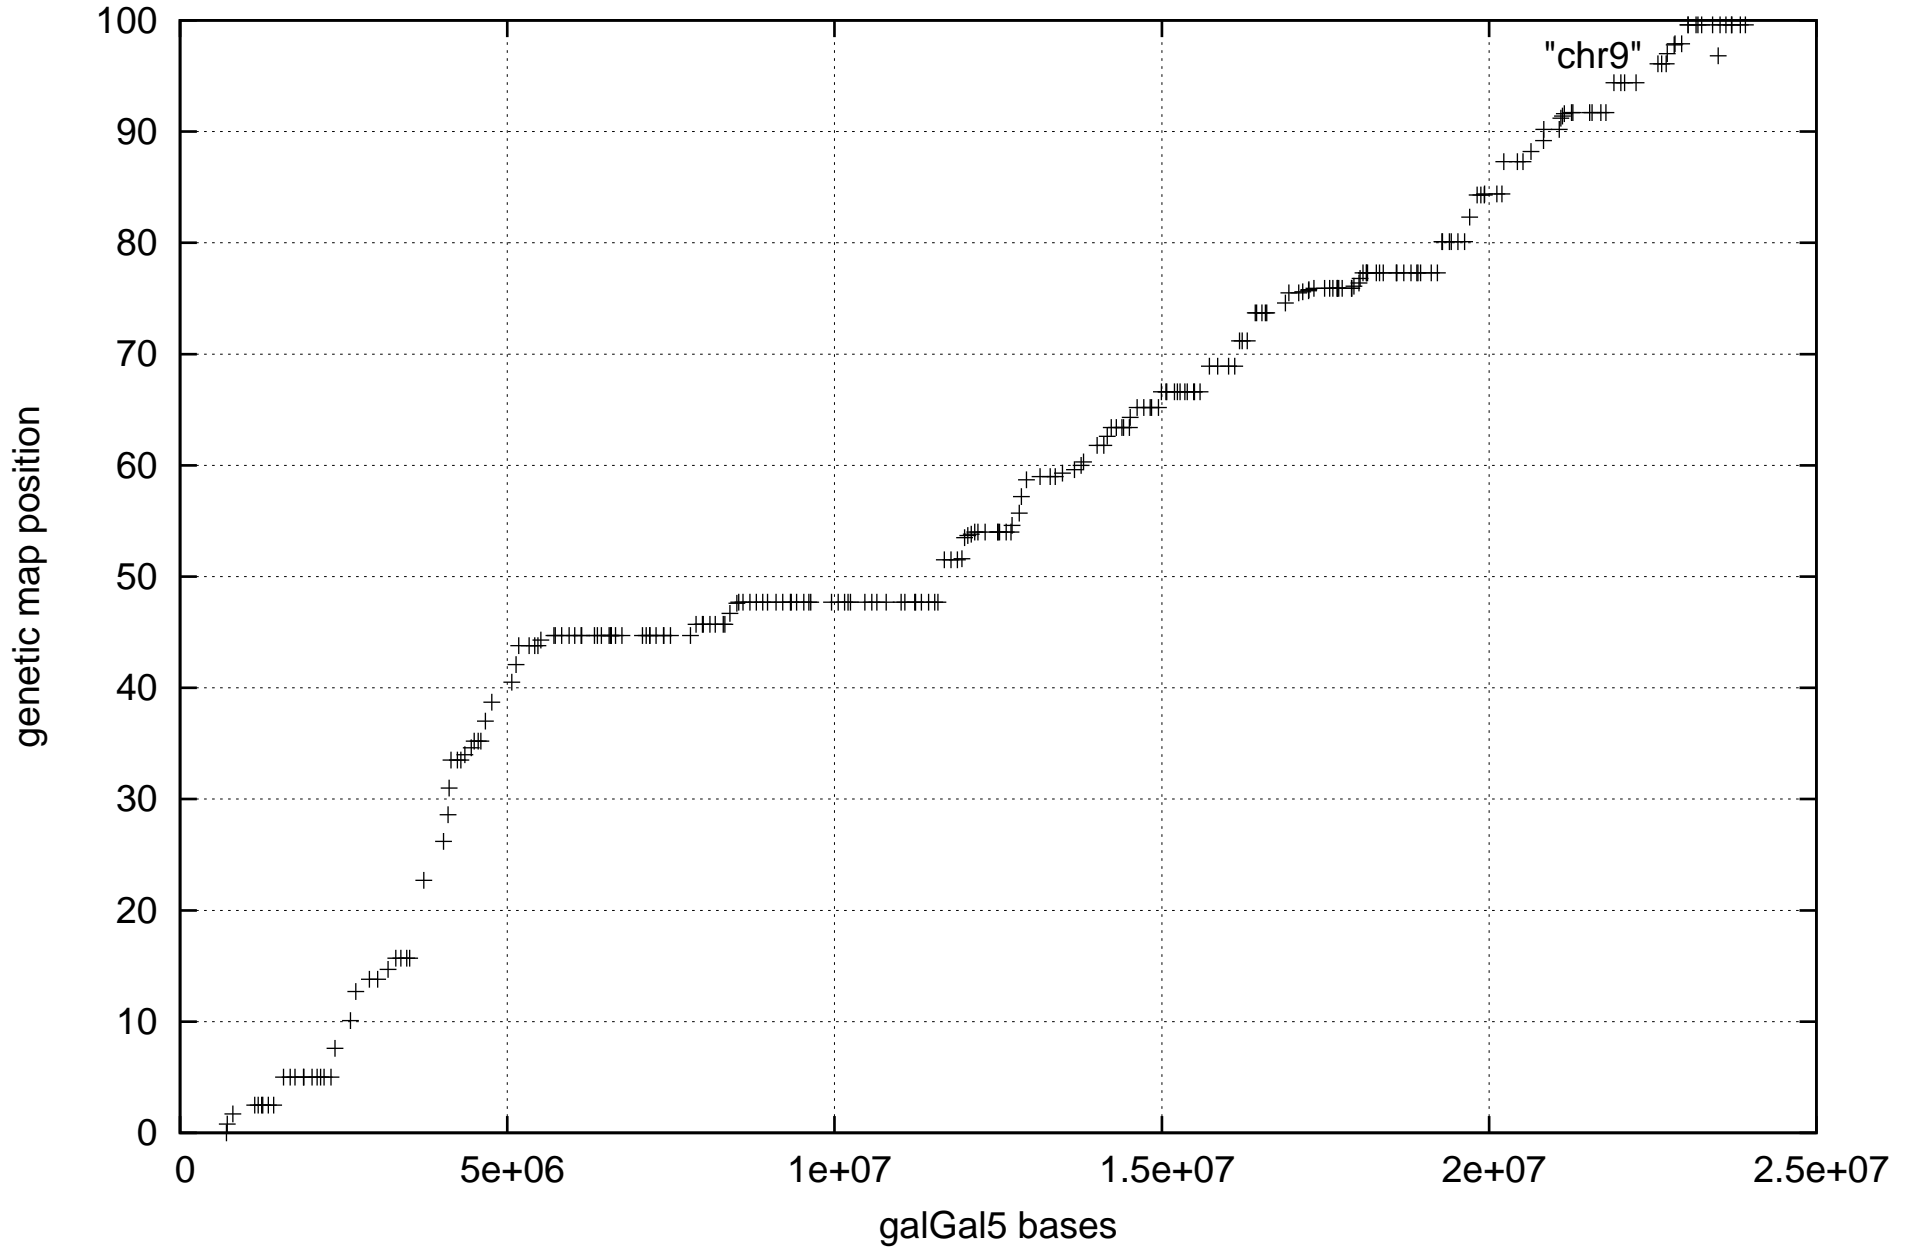

# galGal5 recombination

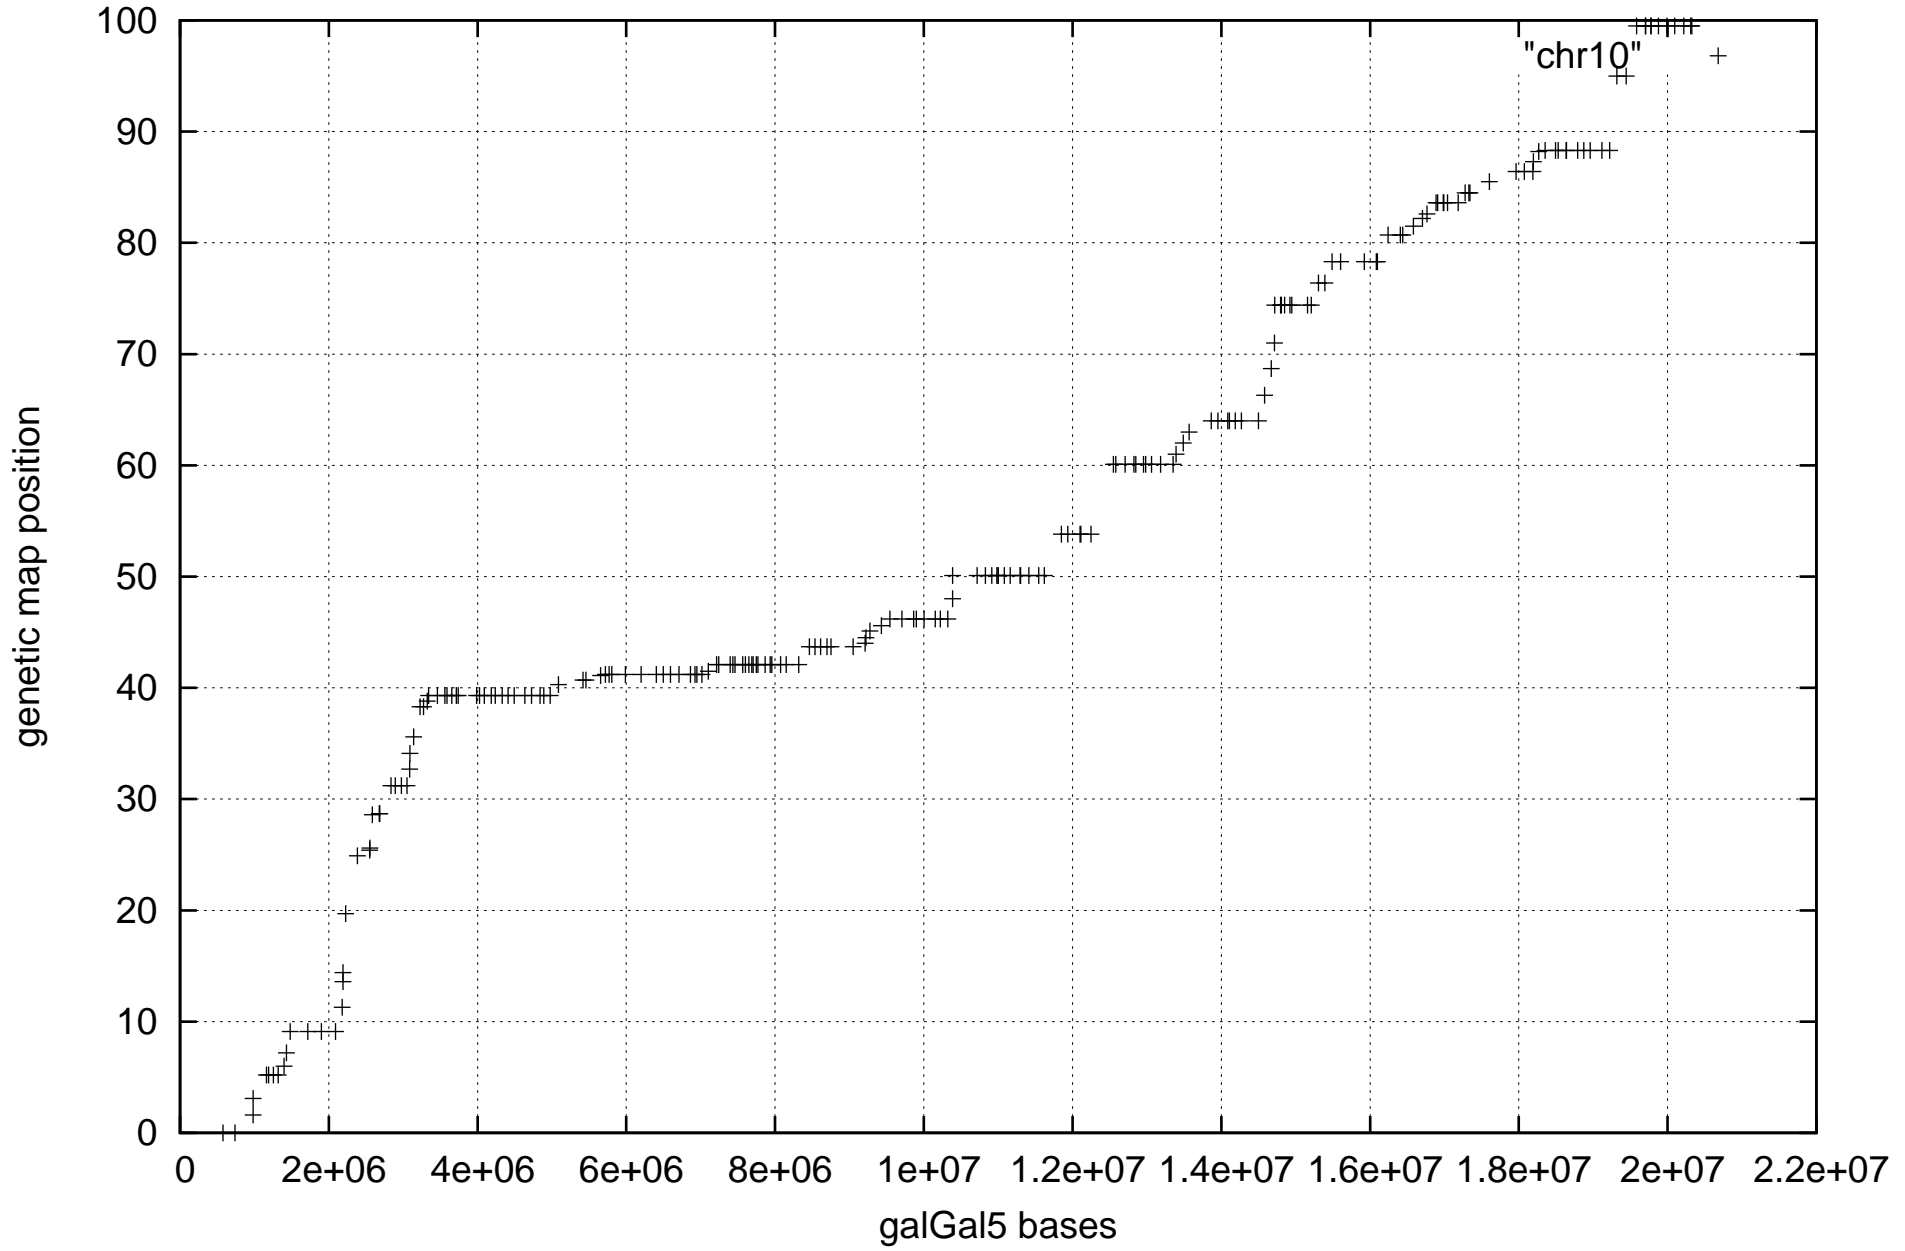

galGal5 recombination

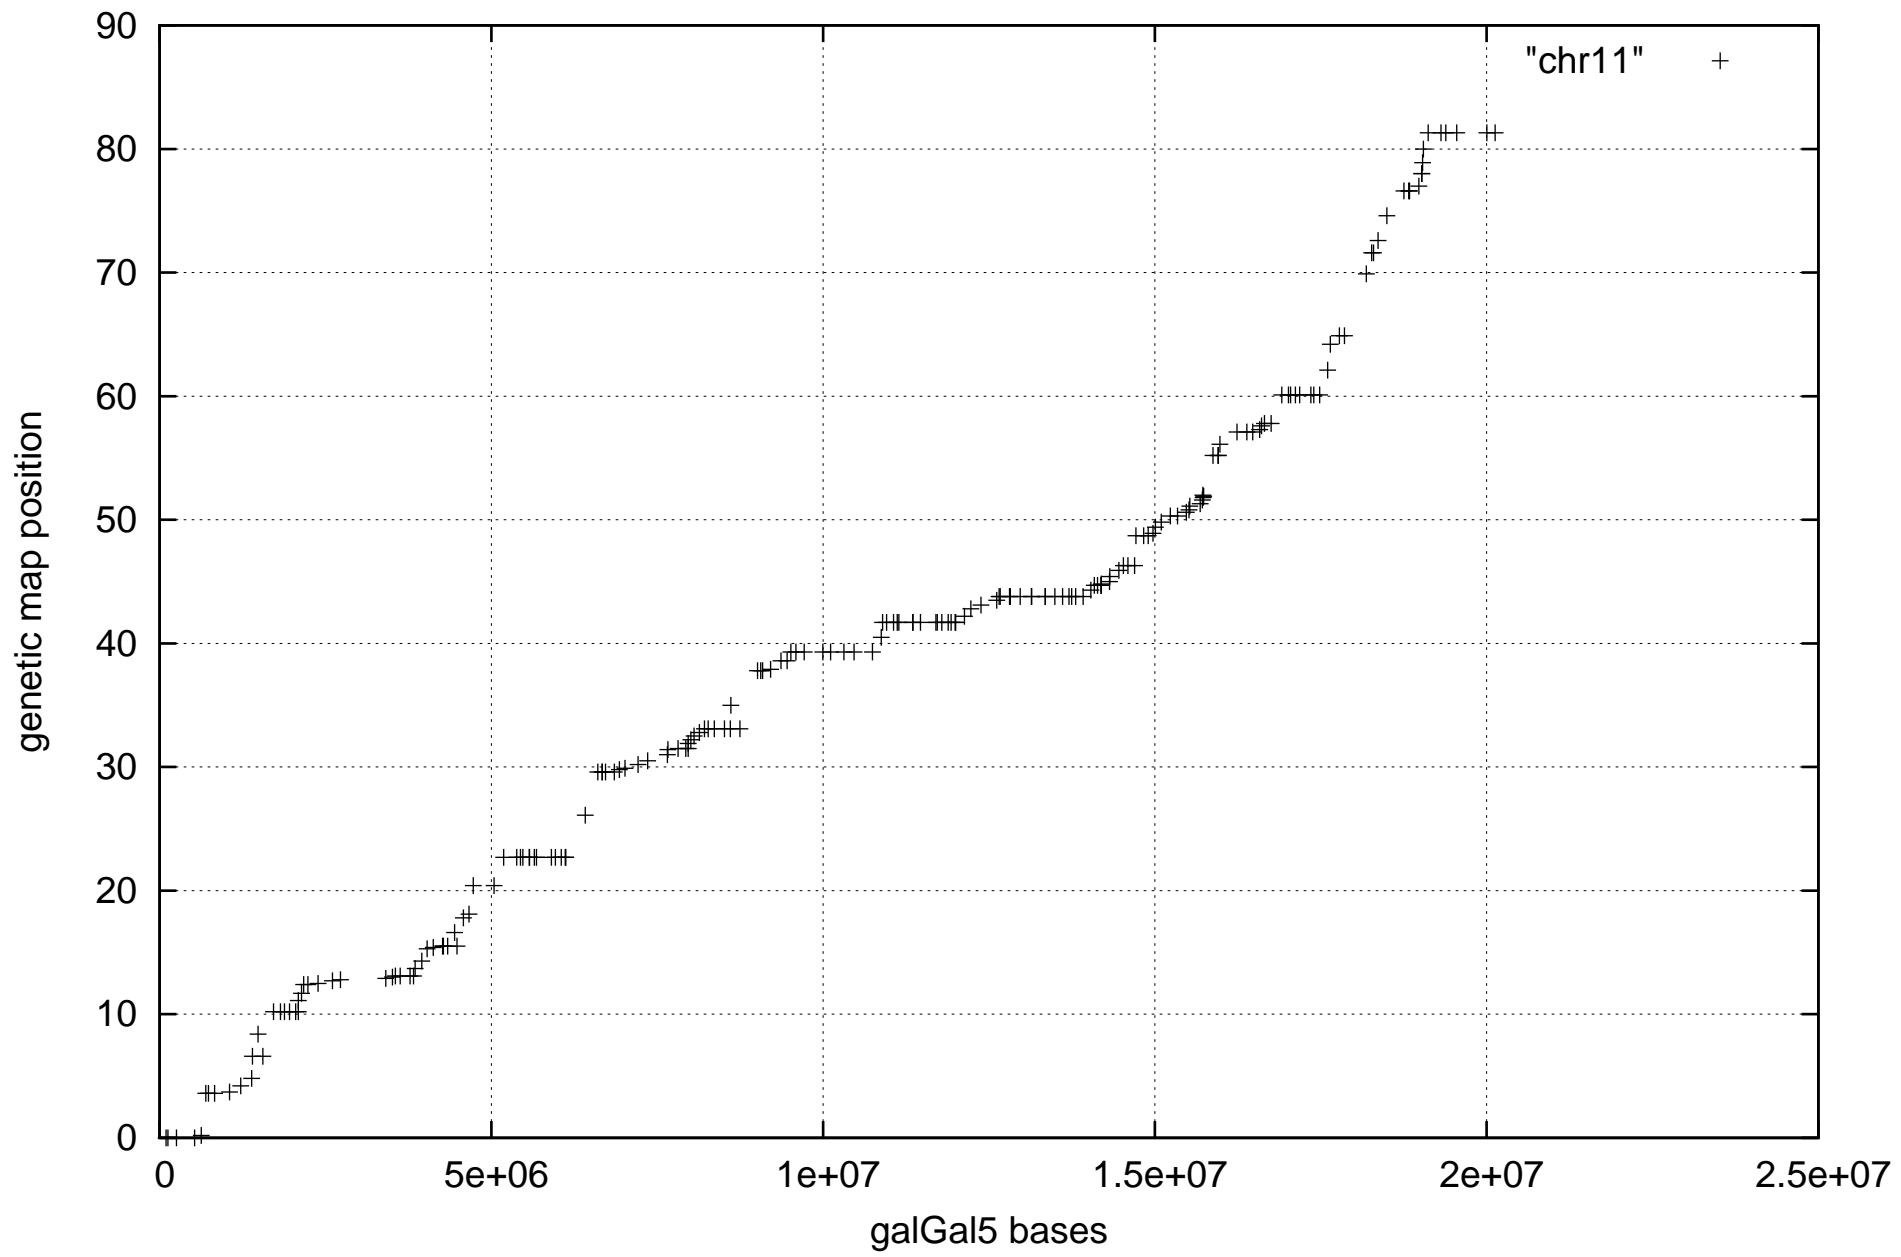

# galGal5 recombination

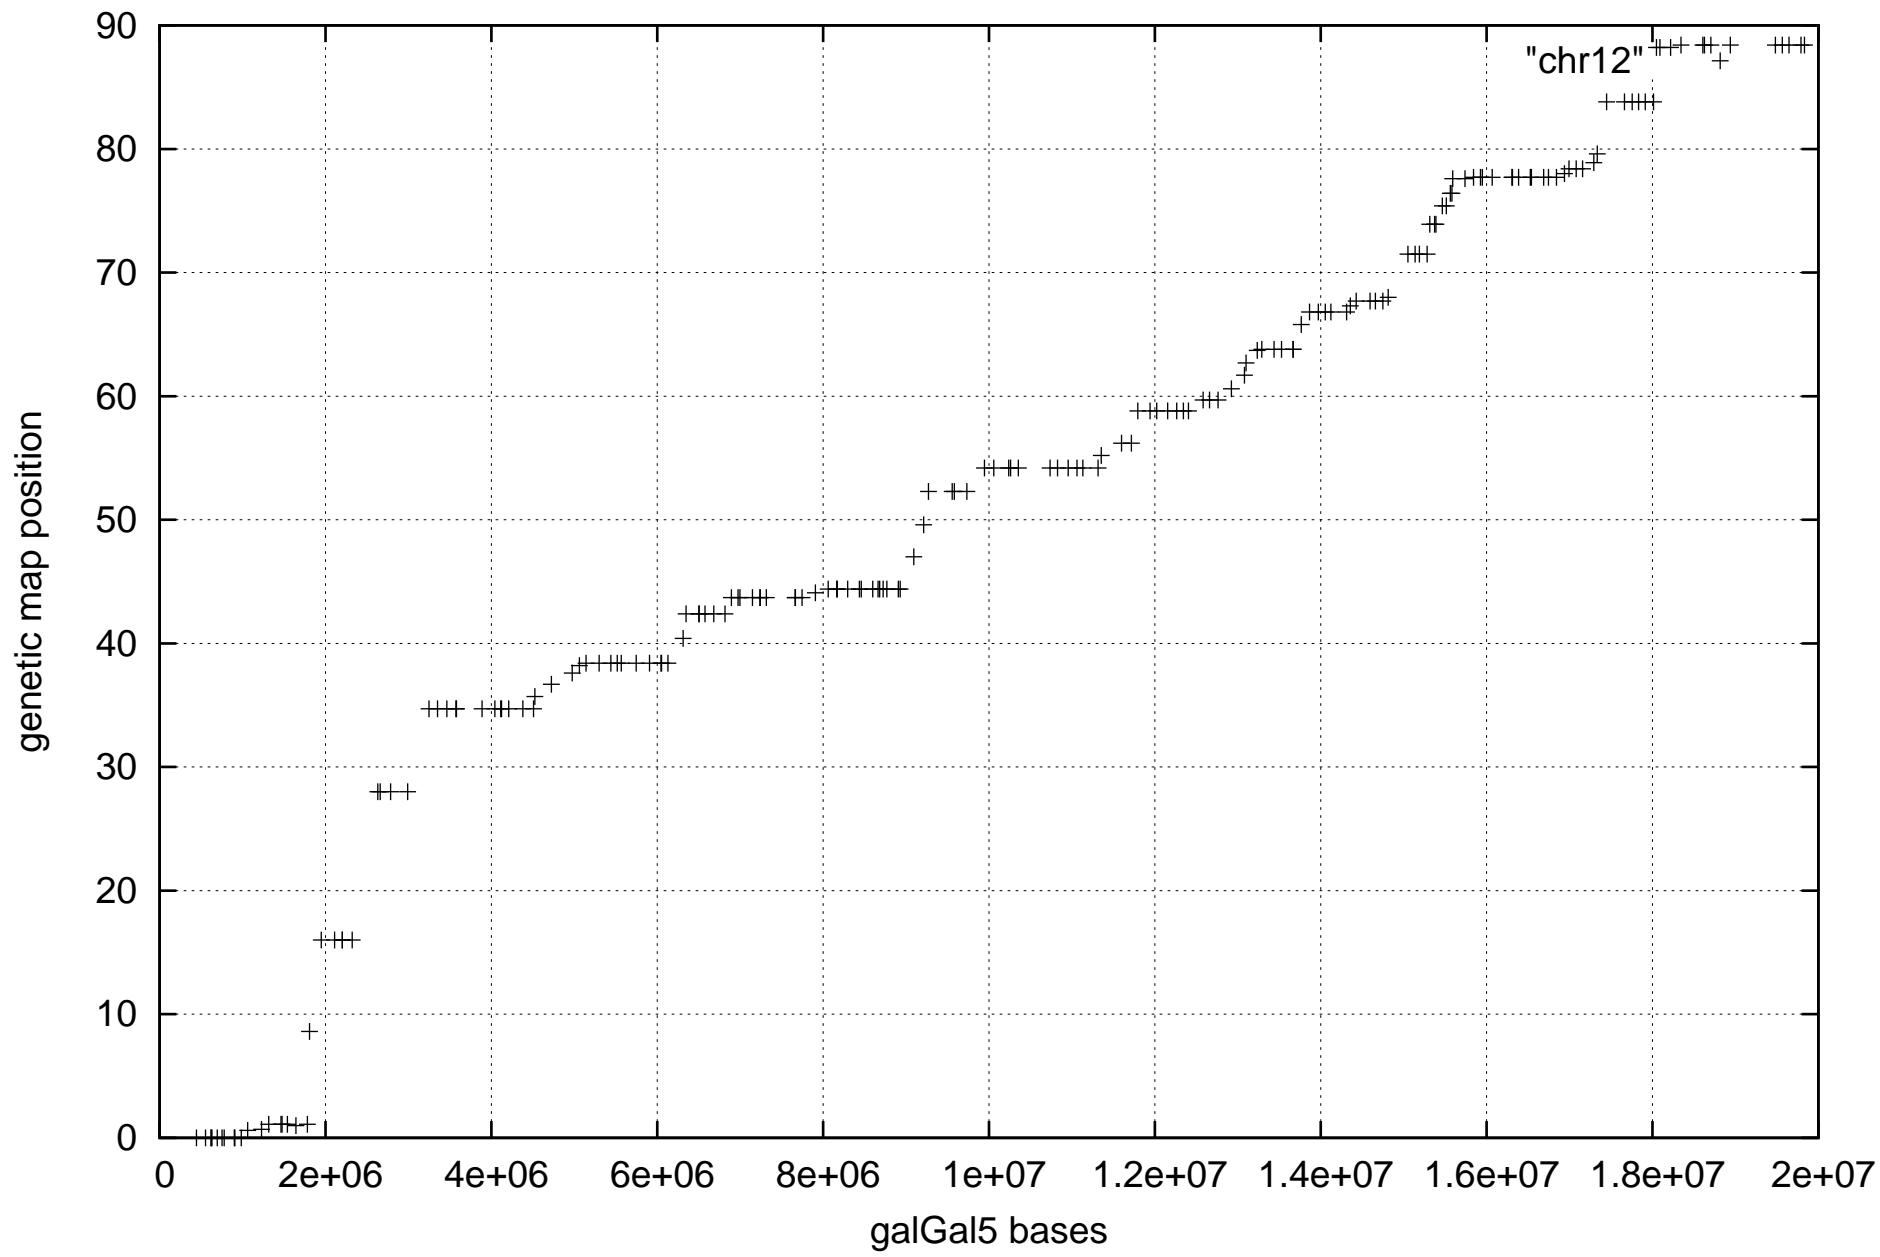

# galGal5 recombination

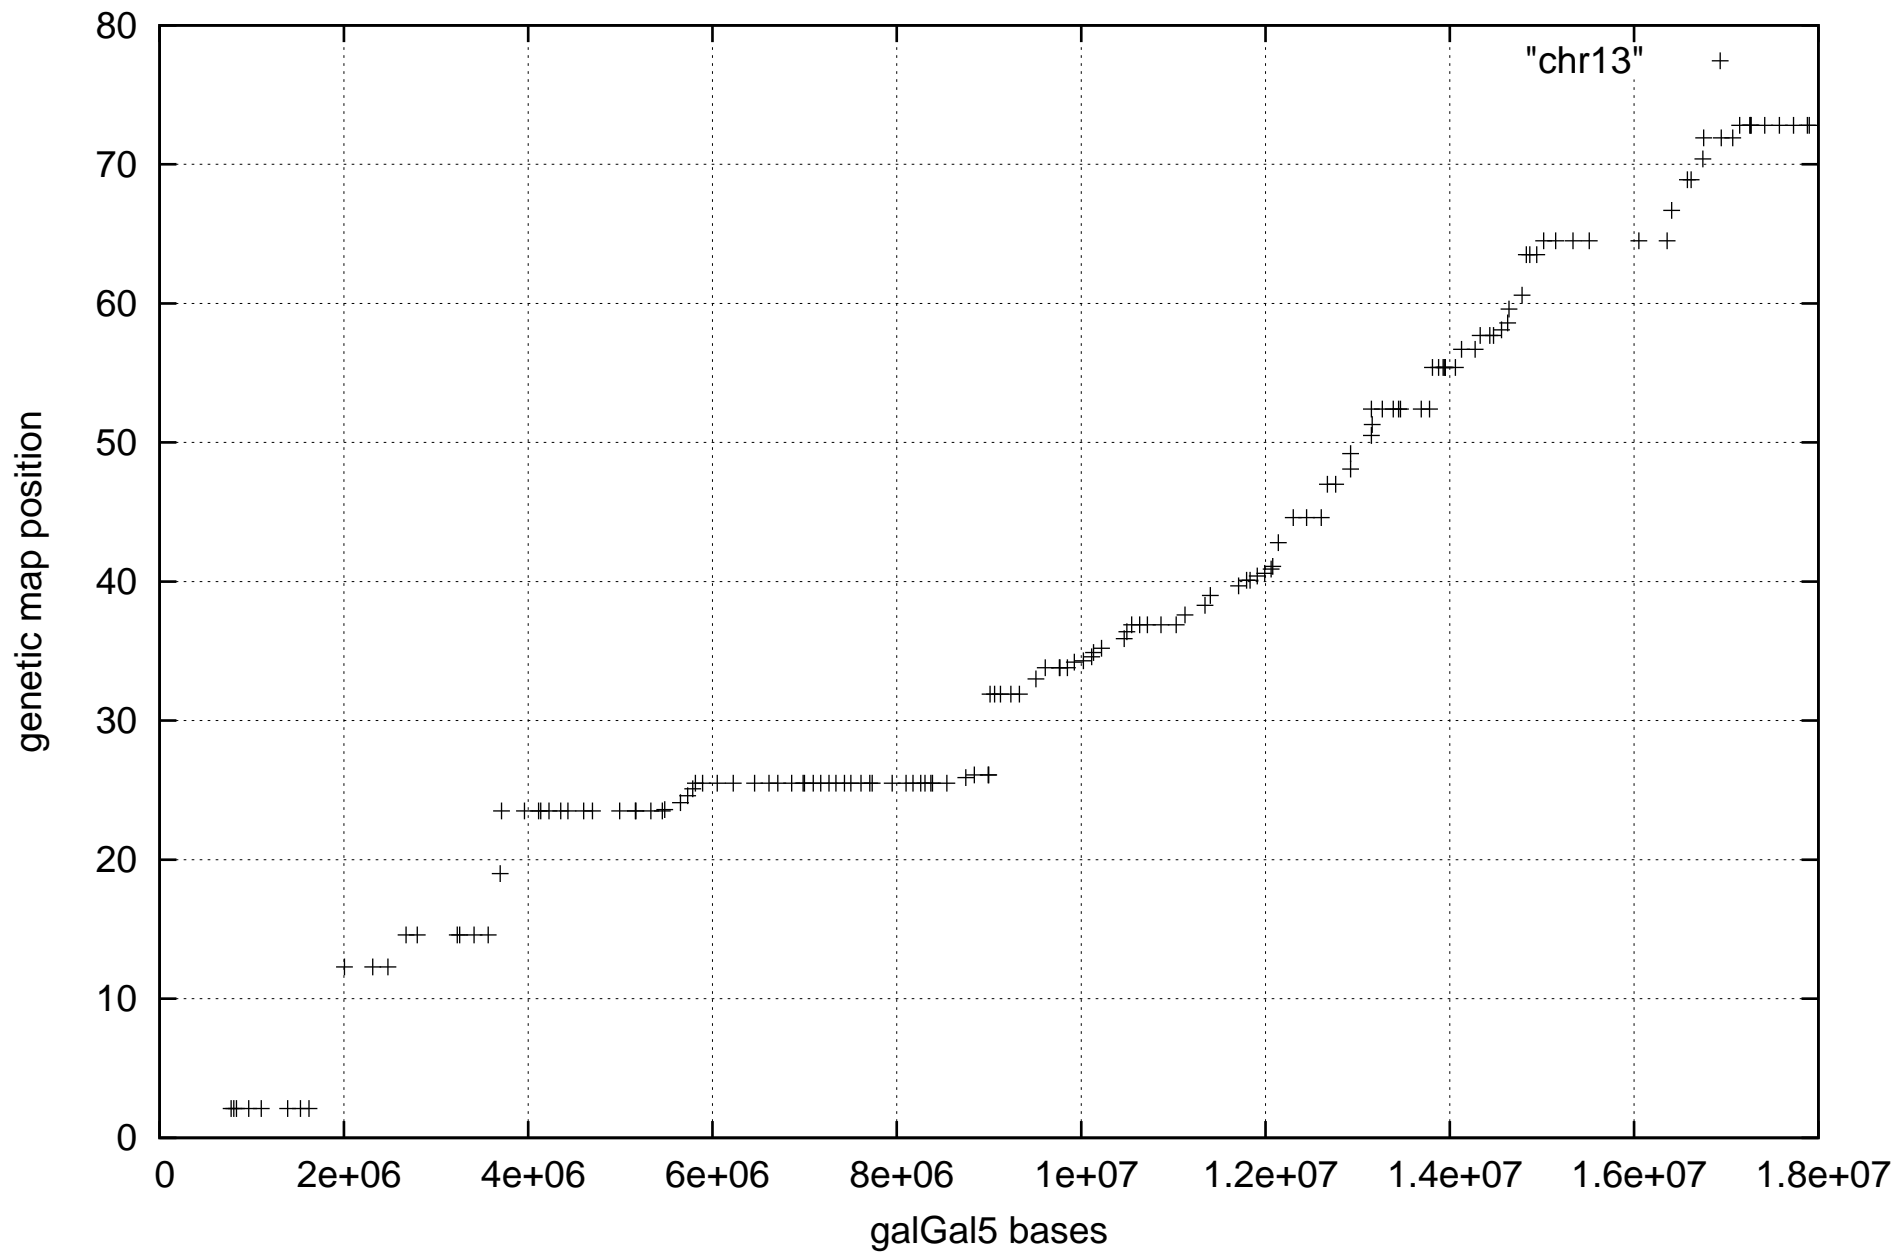

# galGal5 recombination

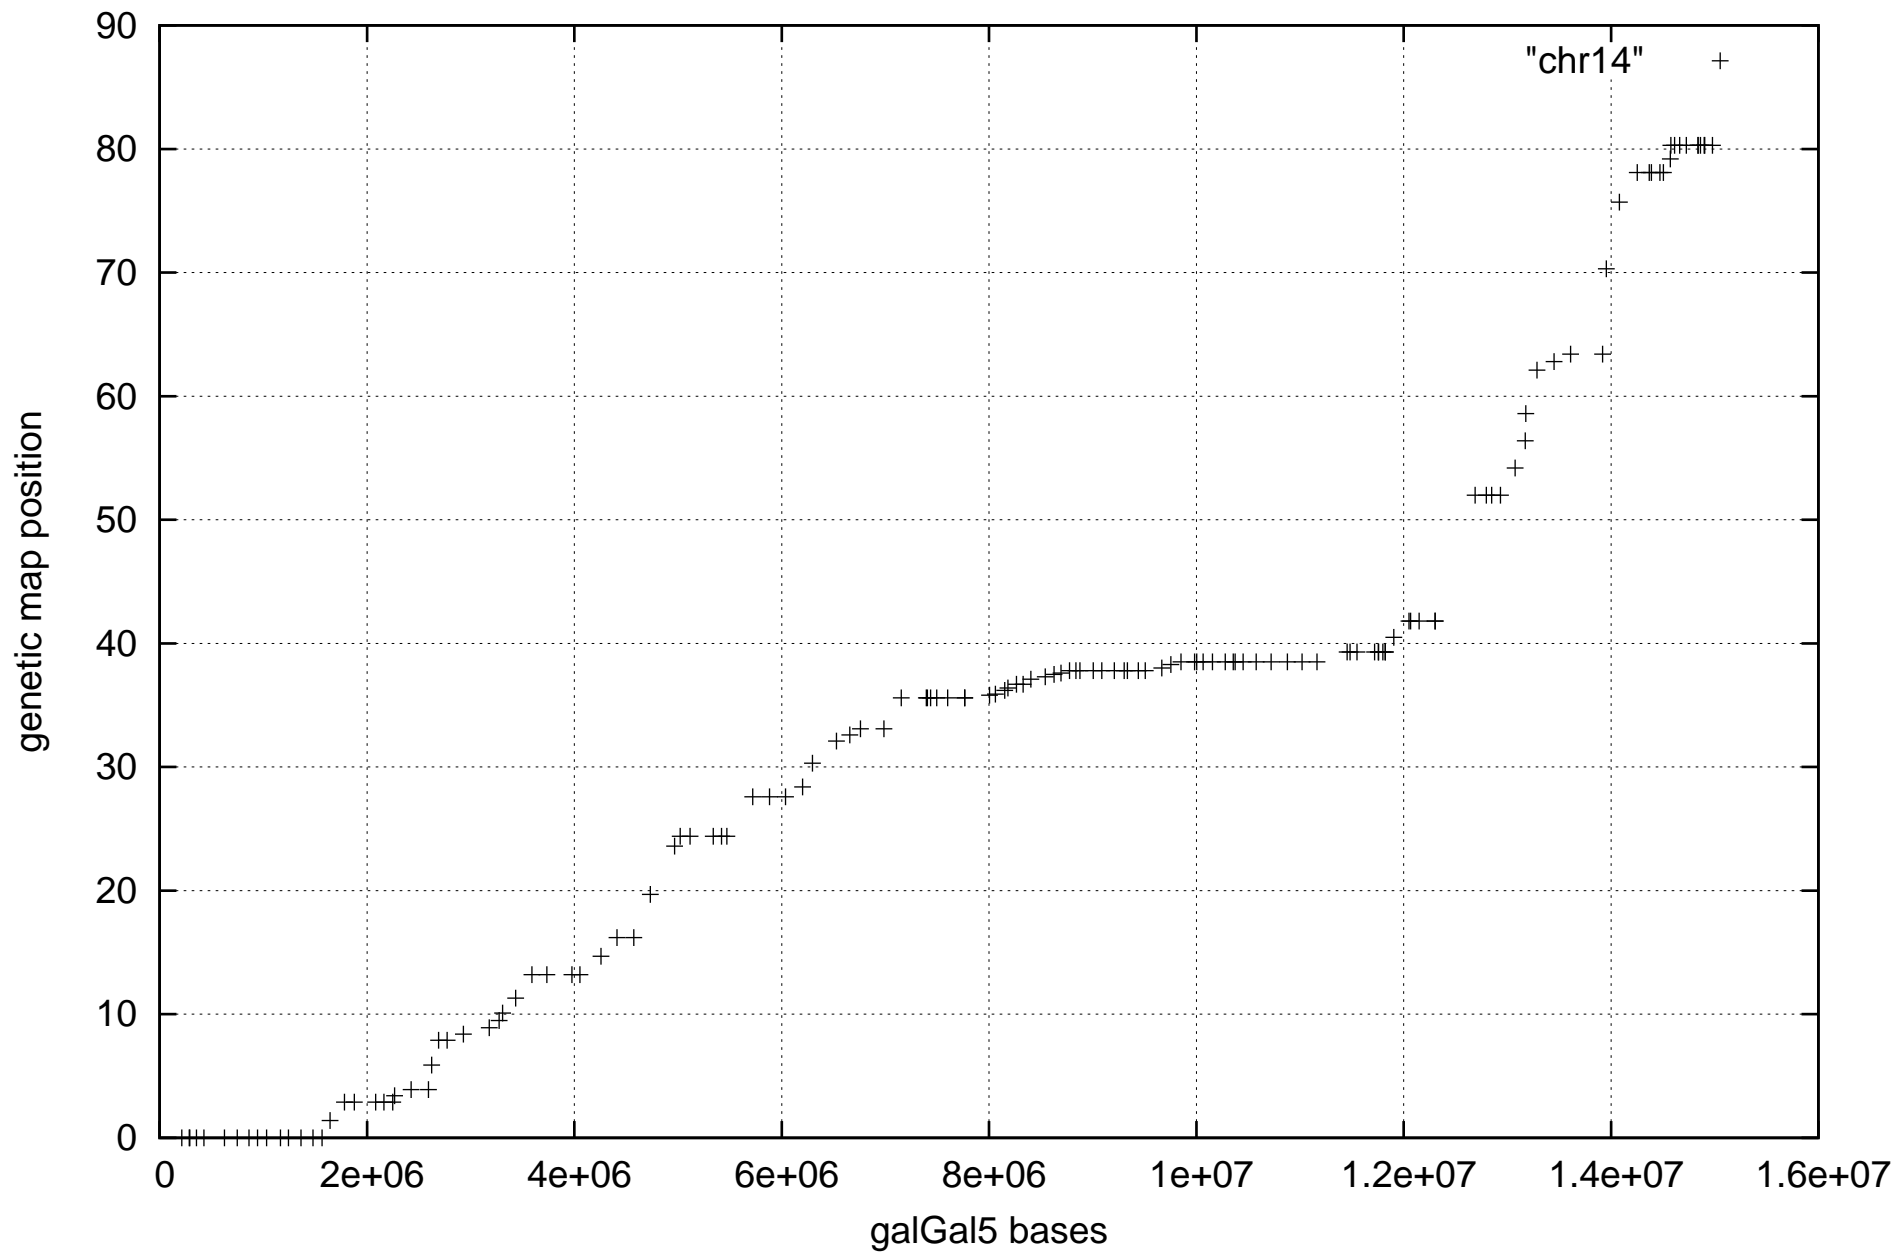

galGal5 recombination

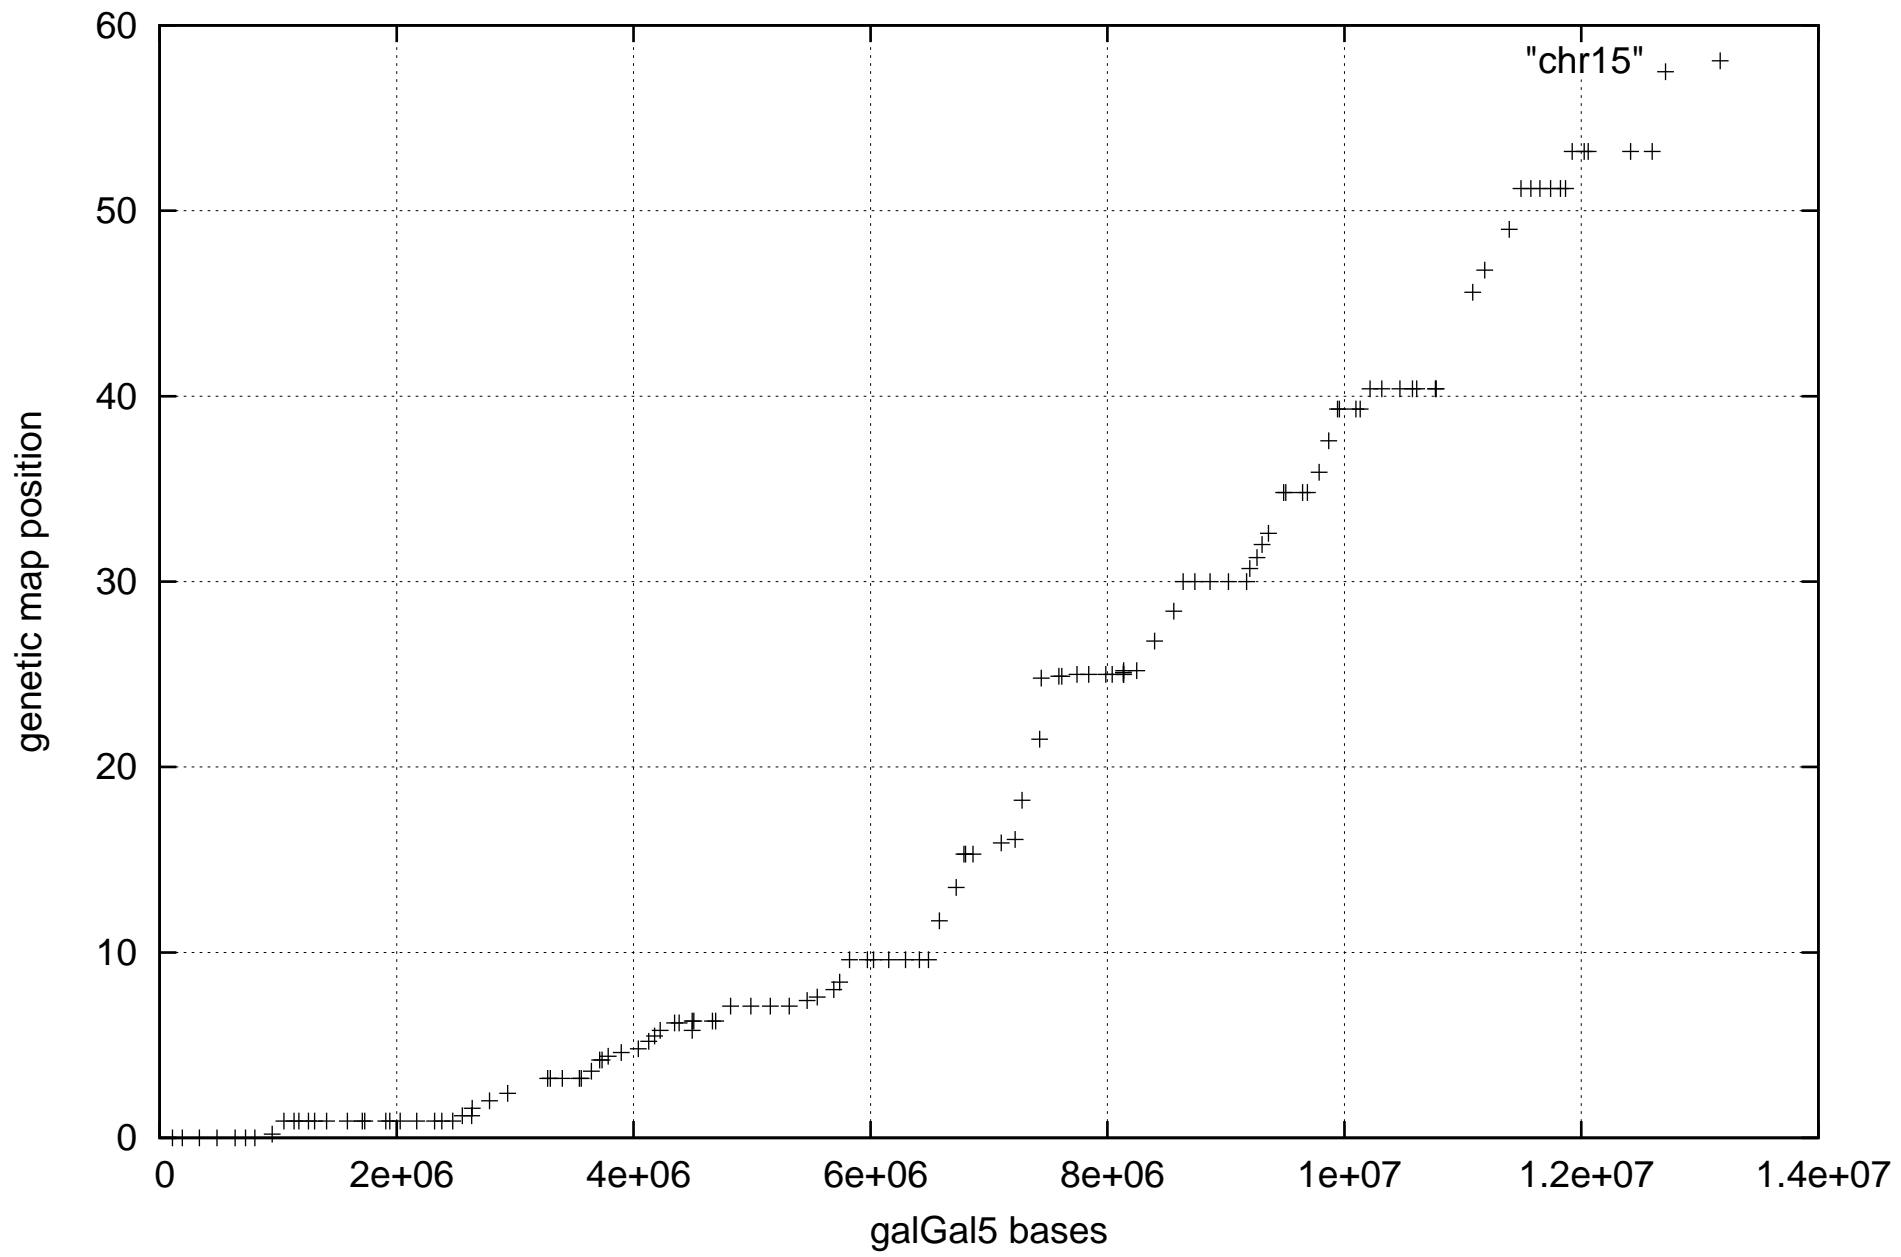

galGal5 recombination

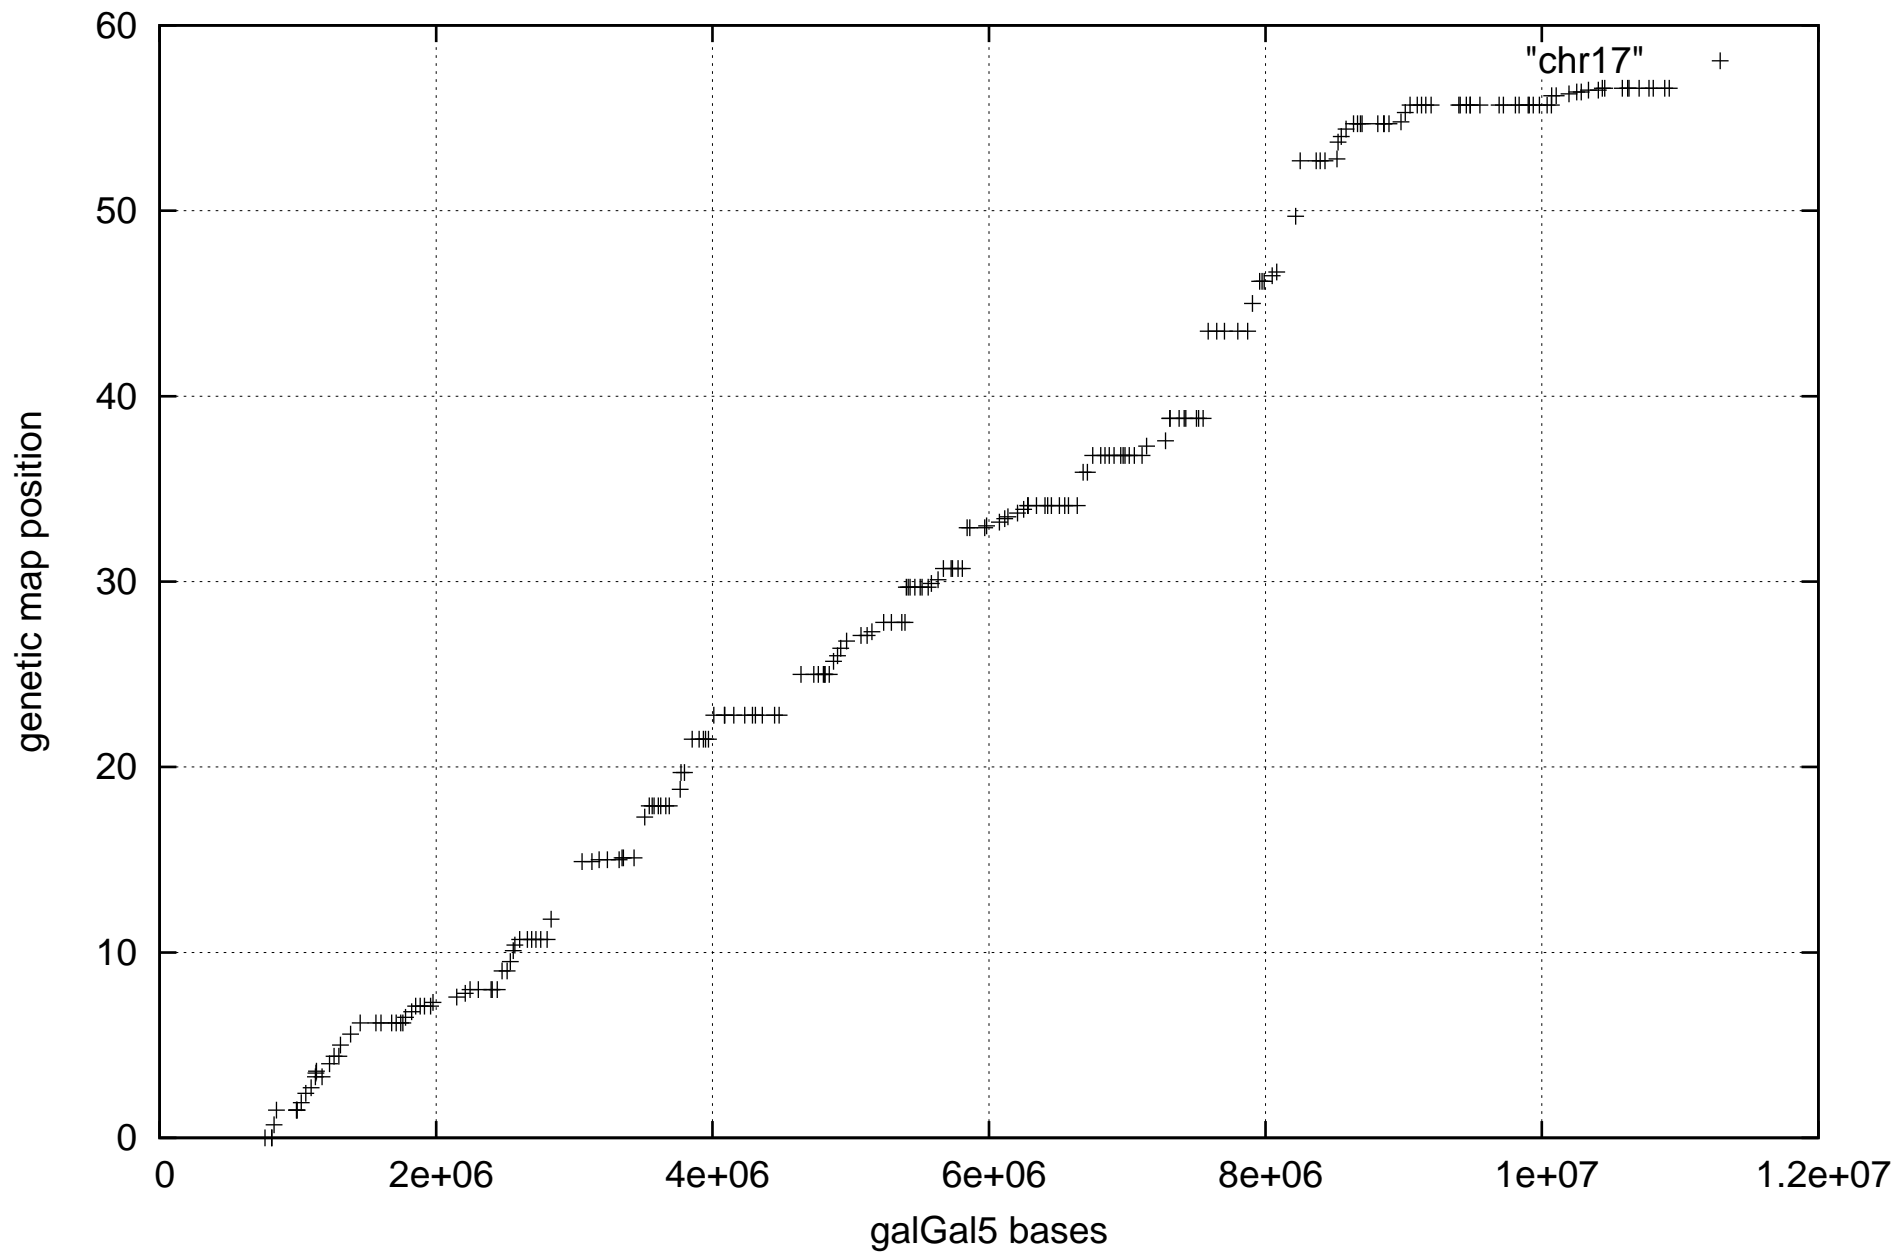



# galGal5 recombination

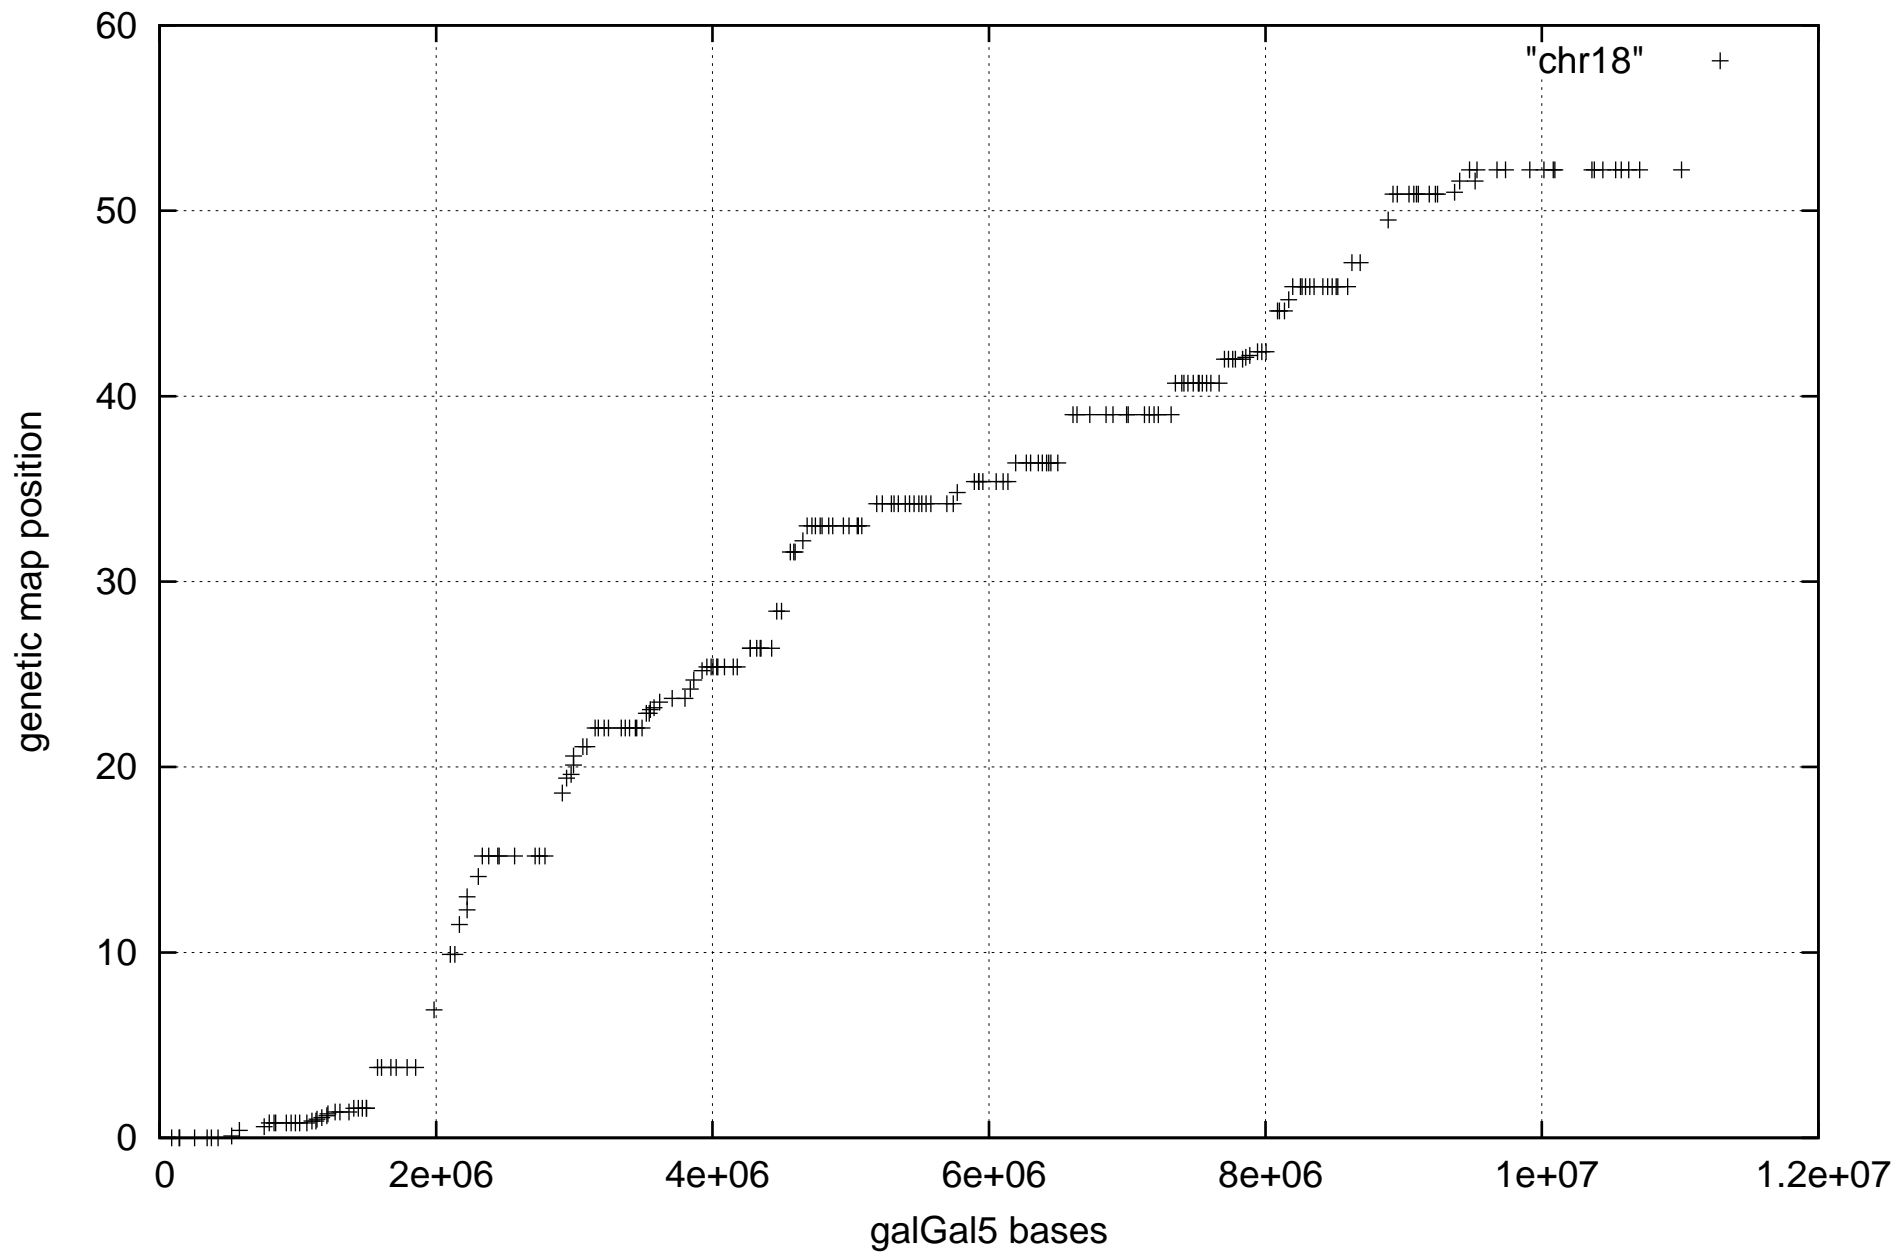

# galGal5 recombination

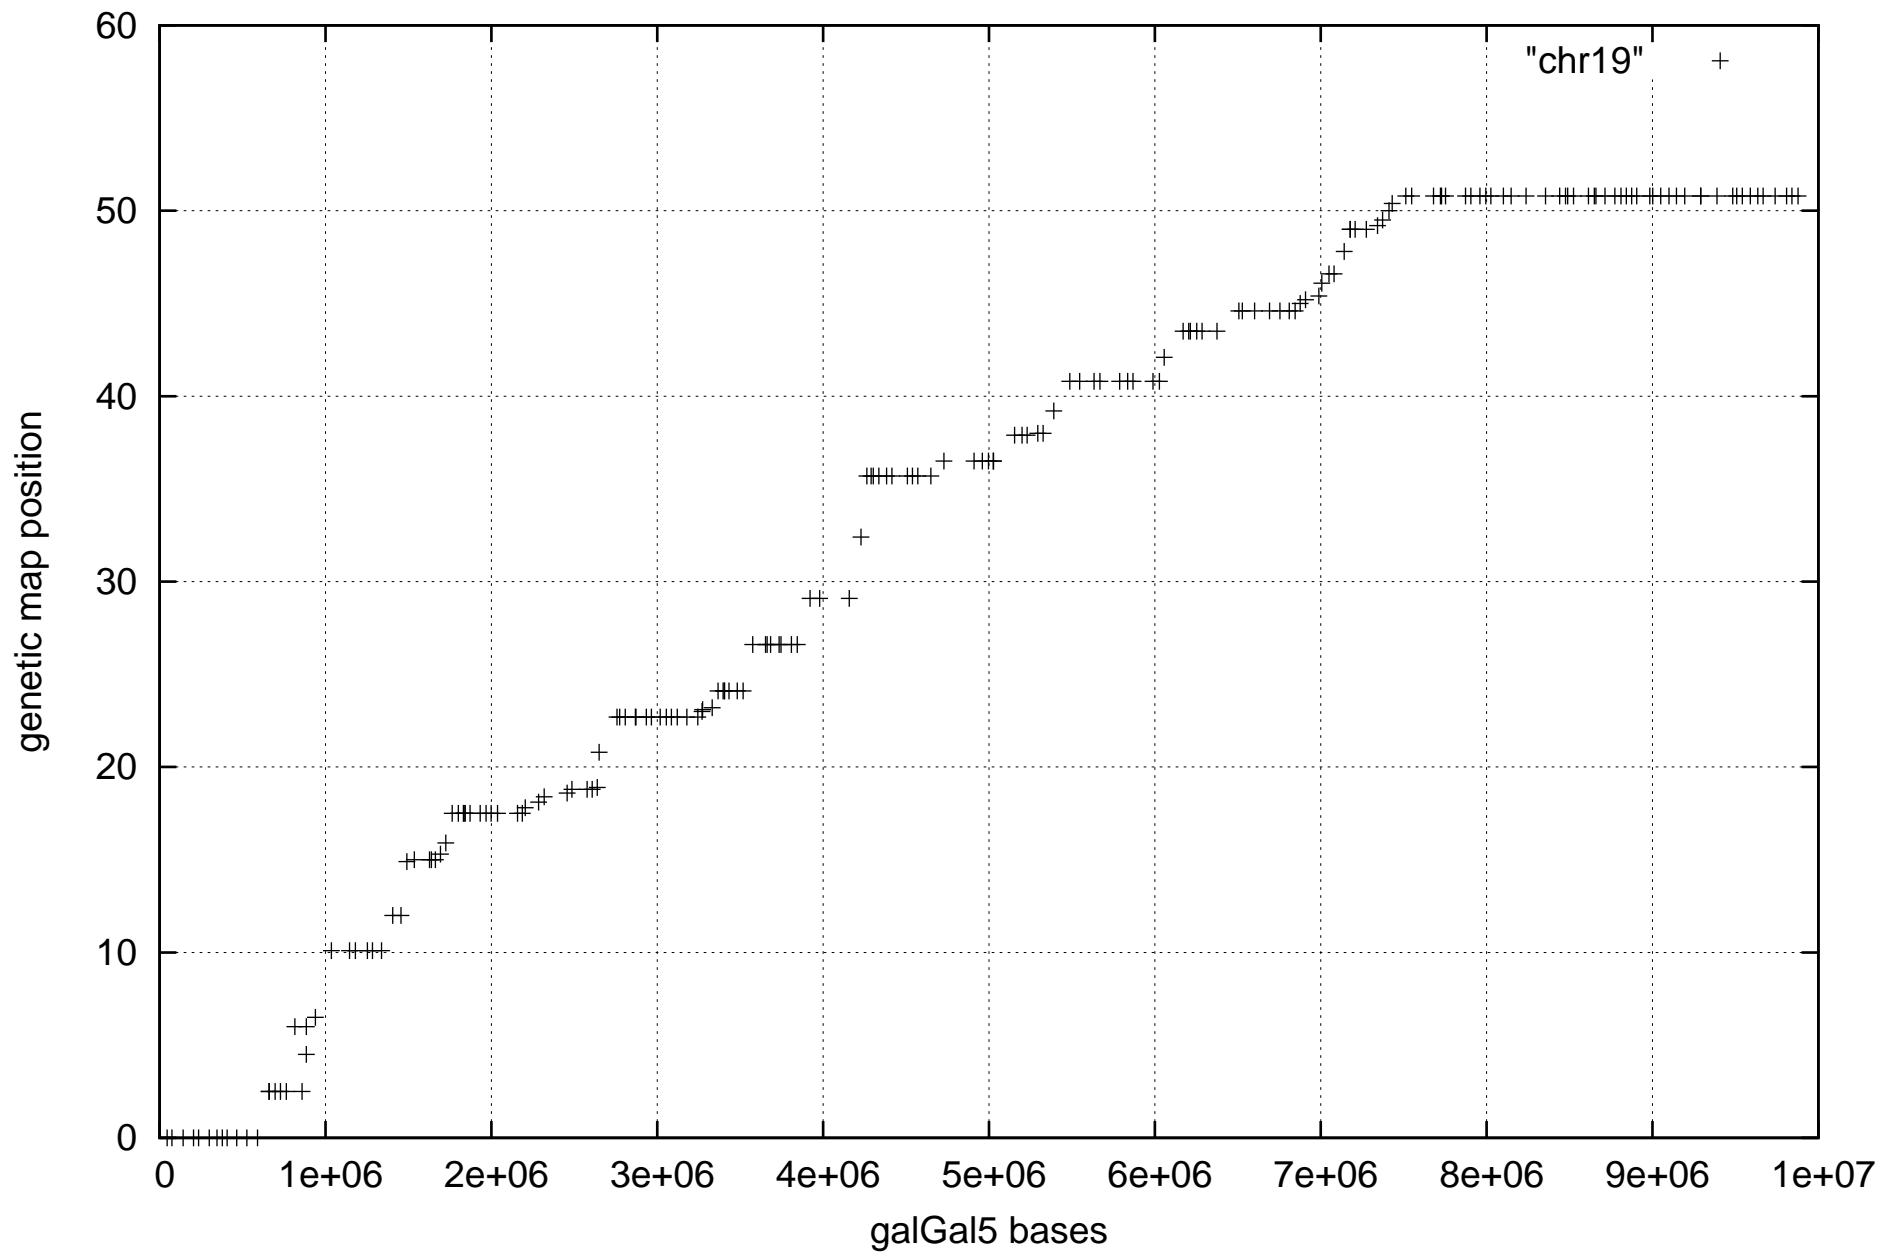

# galGal5 recombination

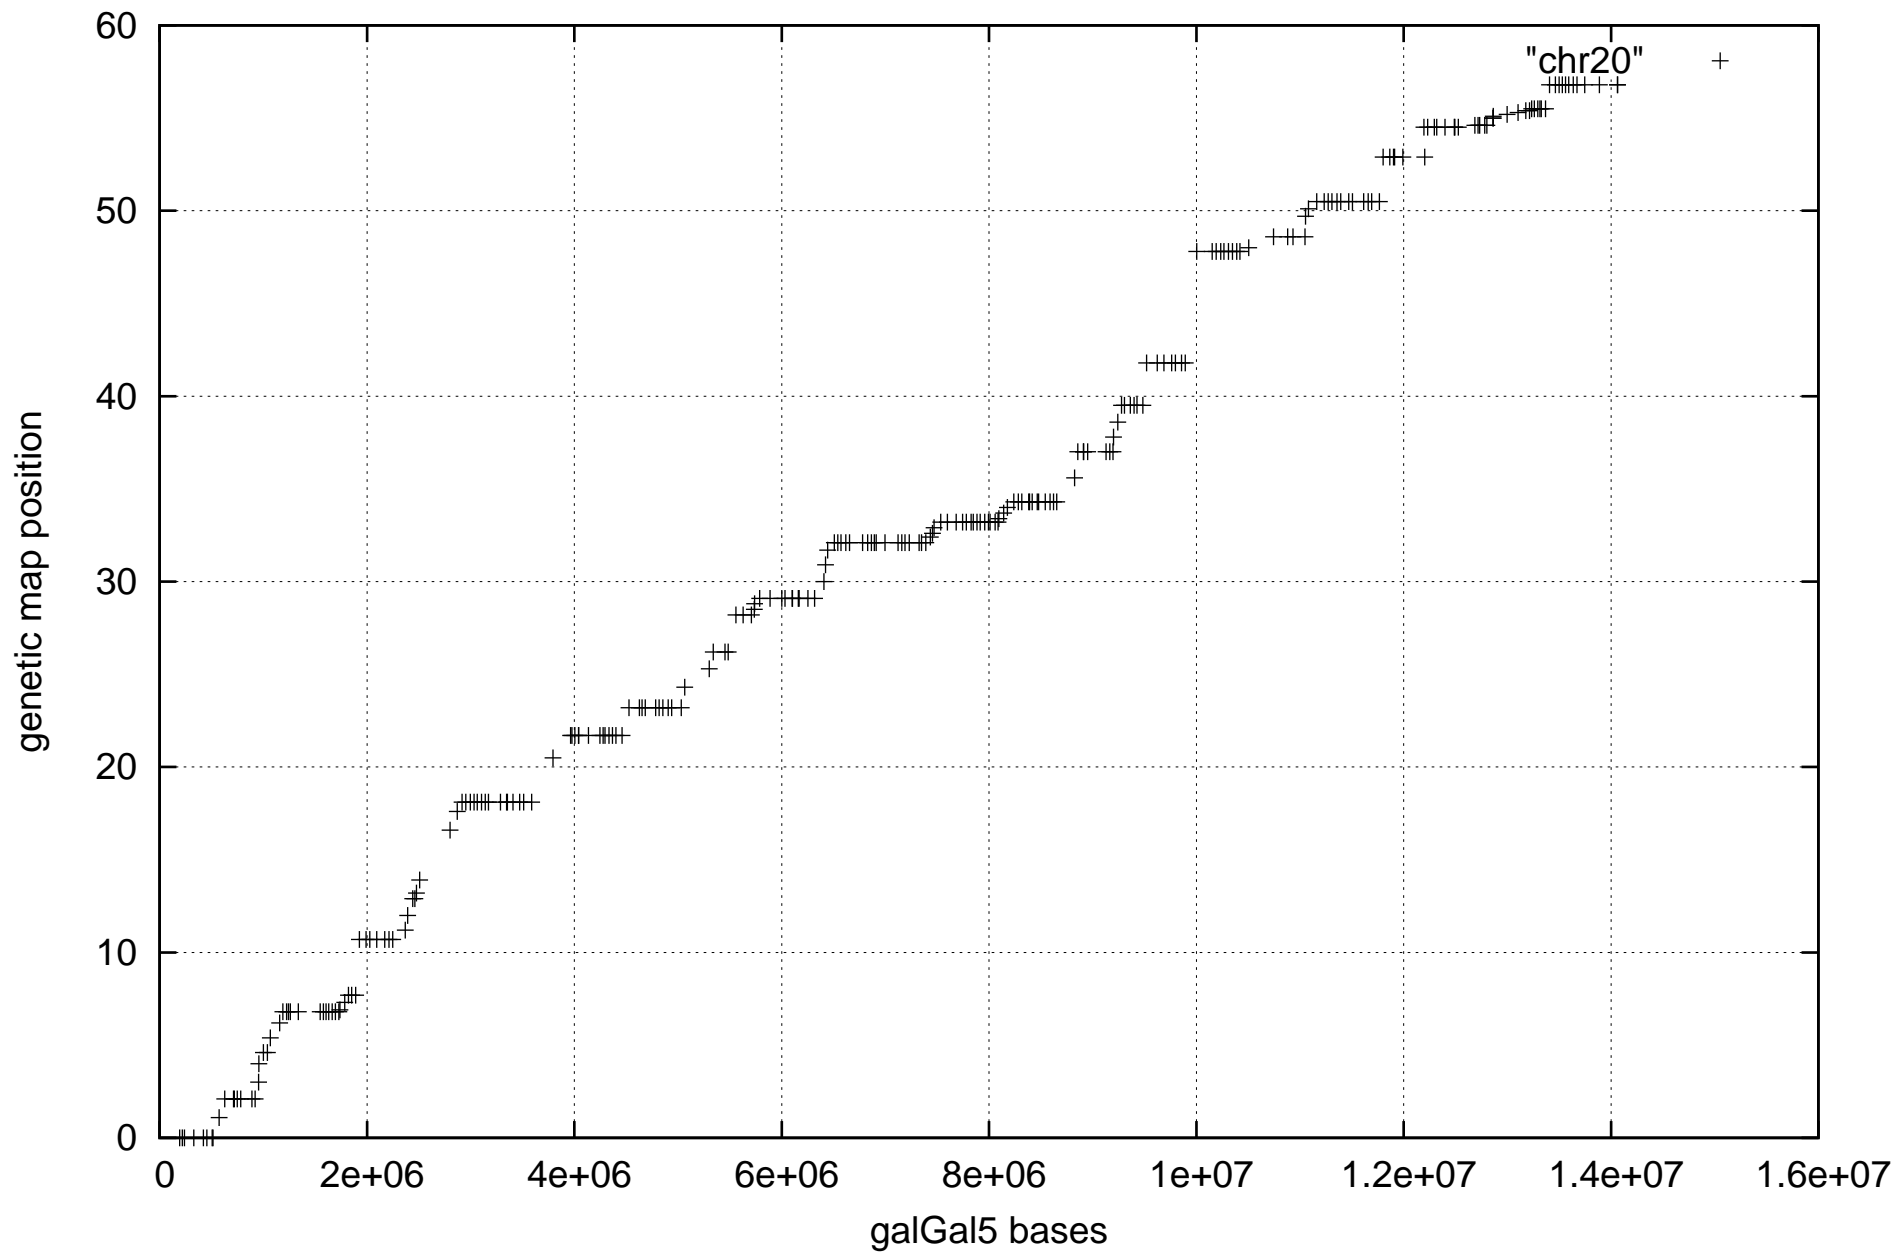

# galGal5 recombination

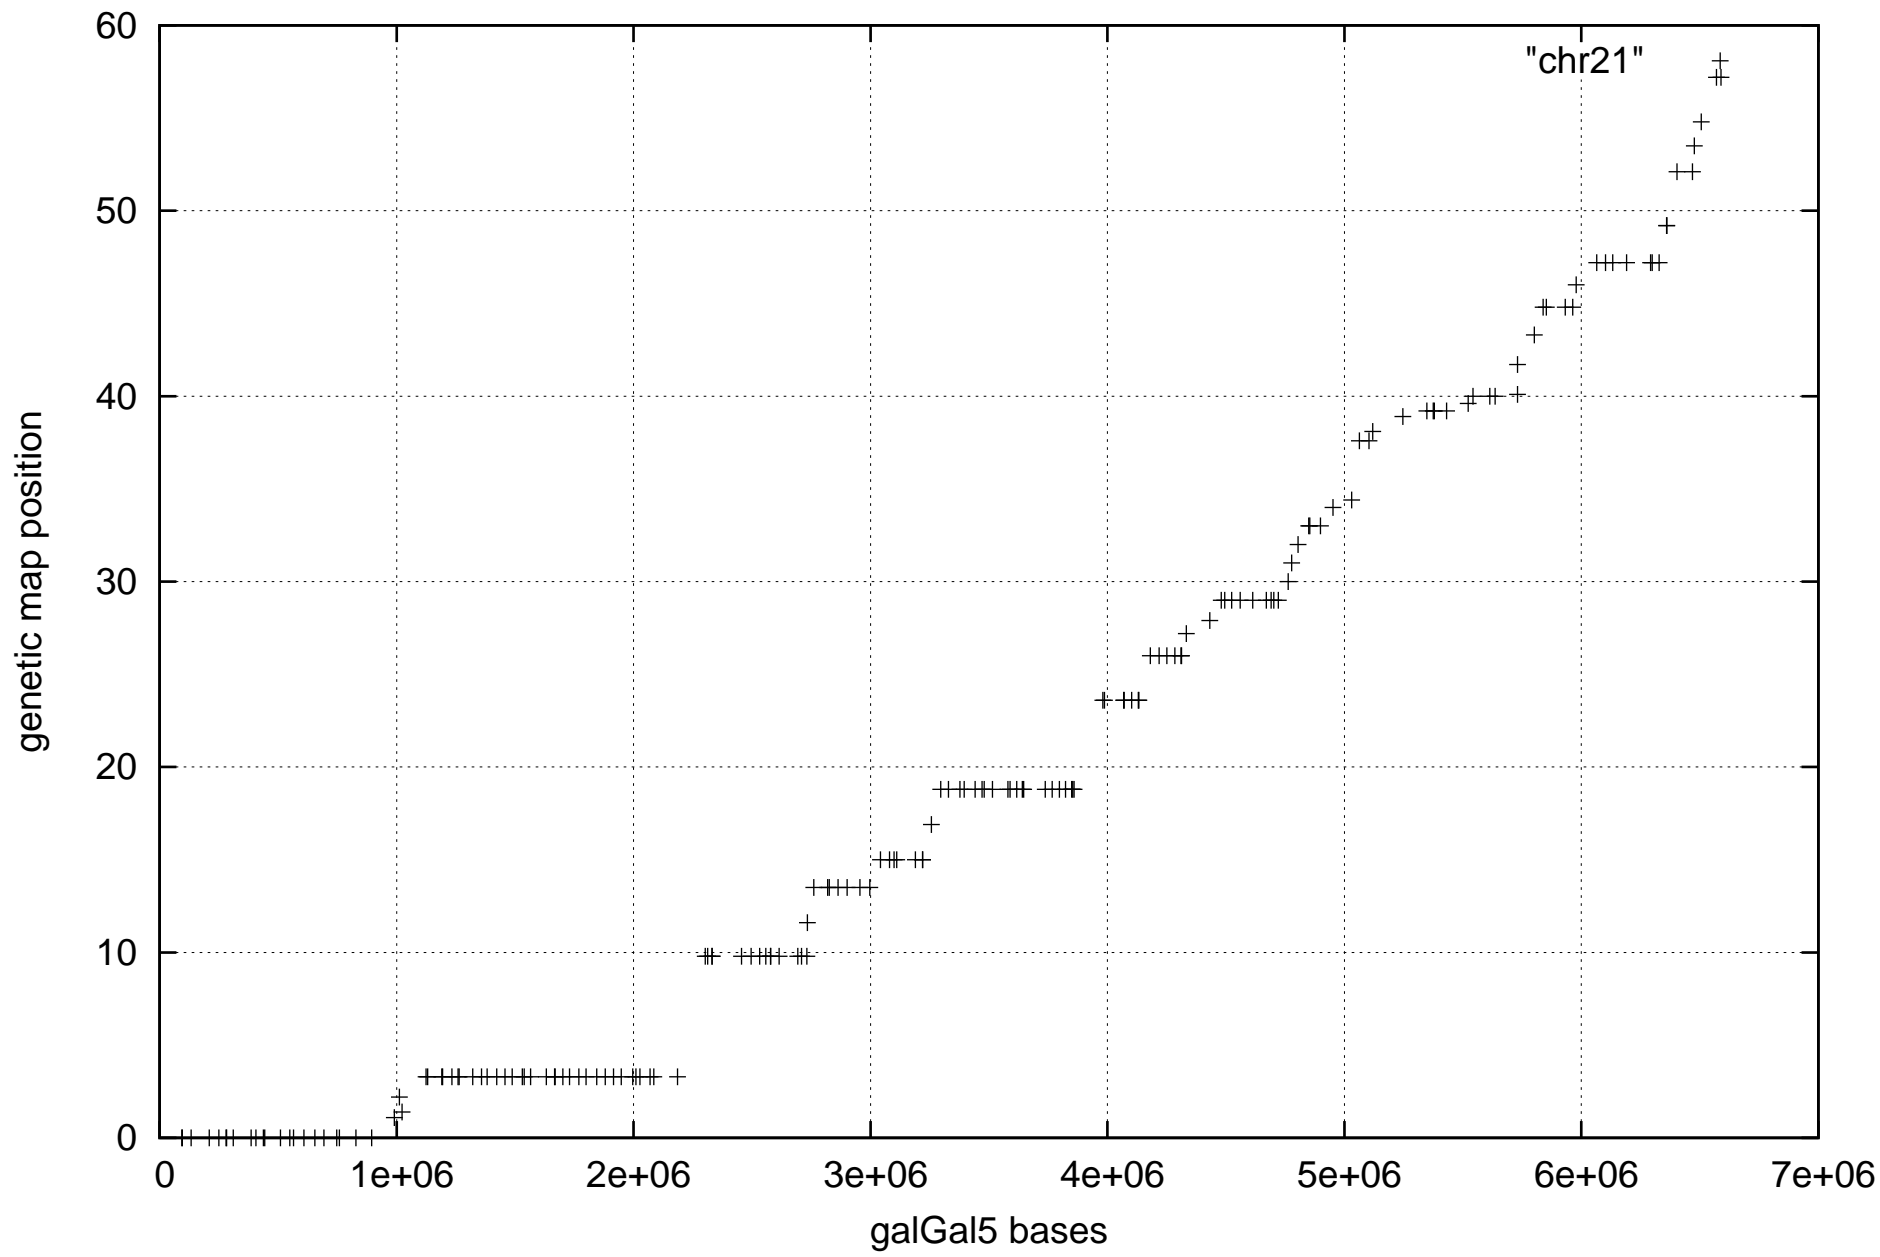

# galGal5 recombination

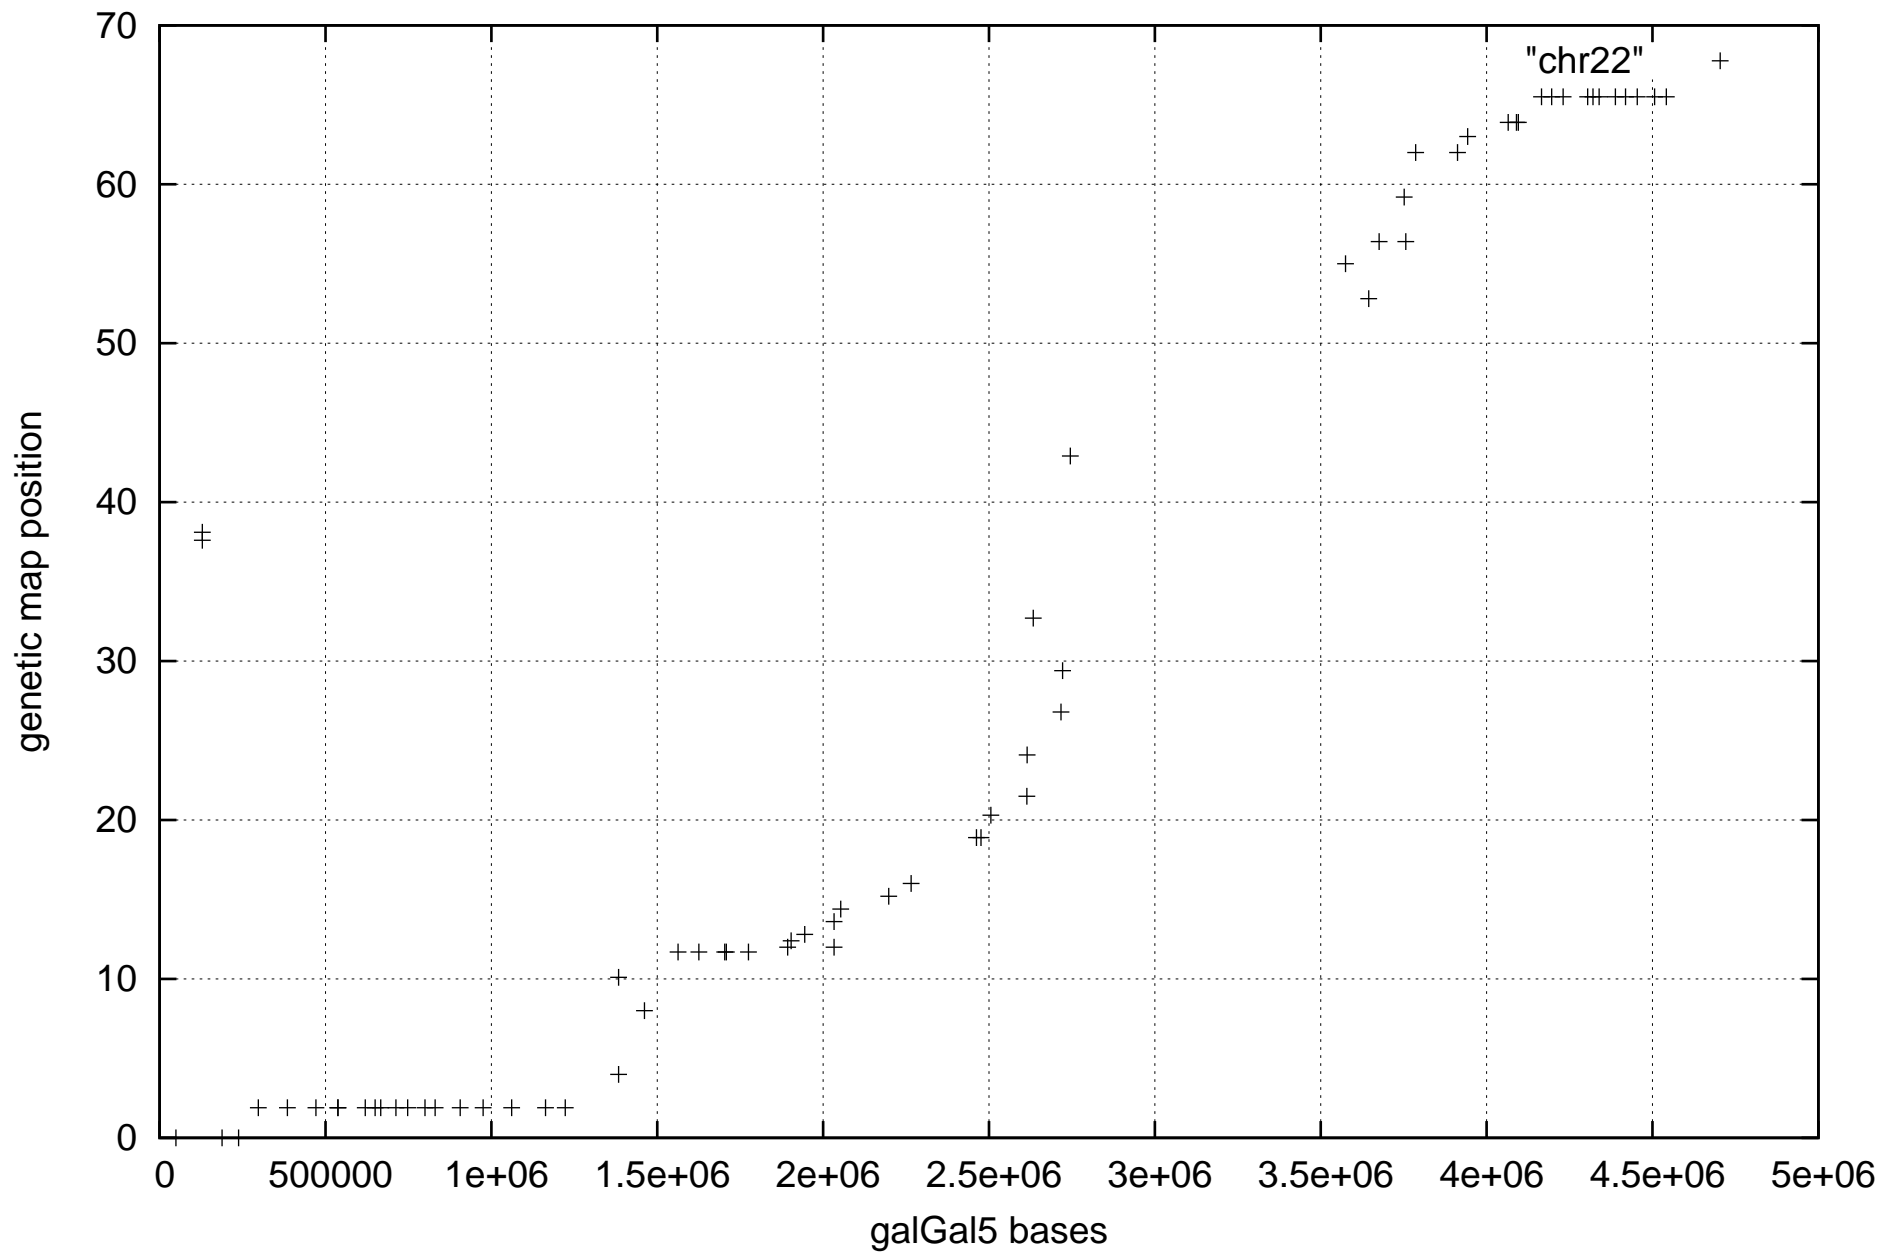

# galGal5 recombination

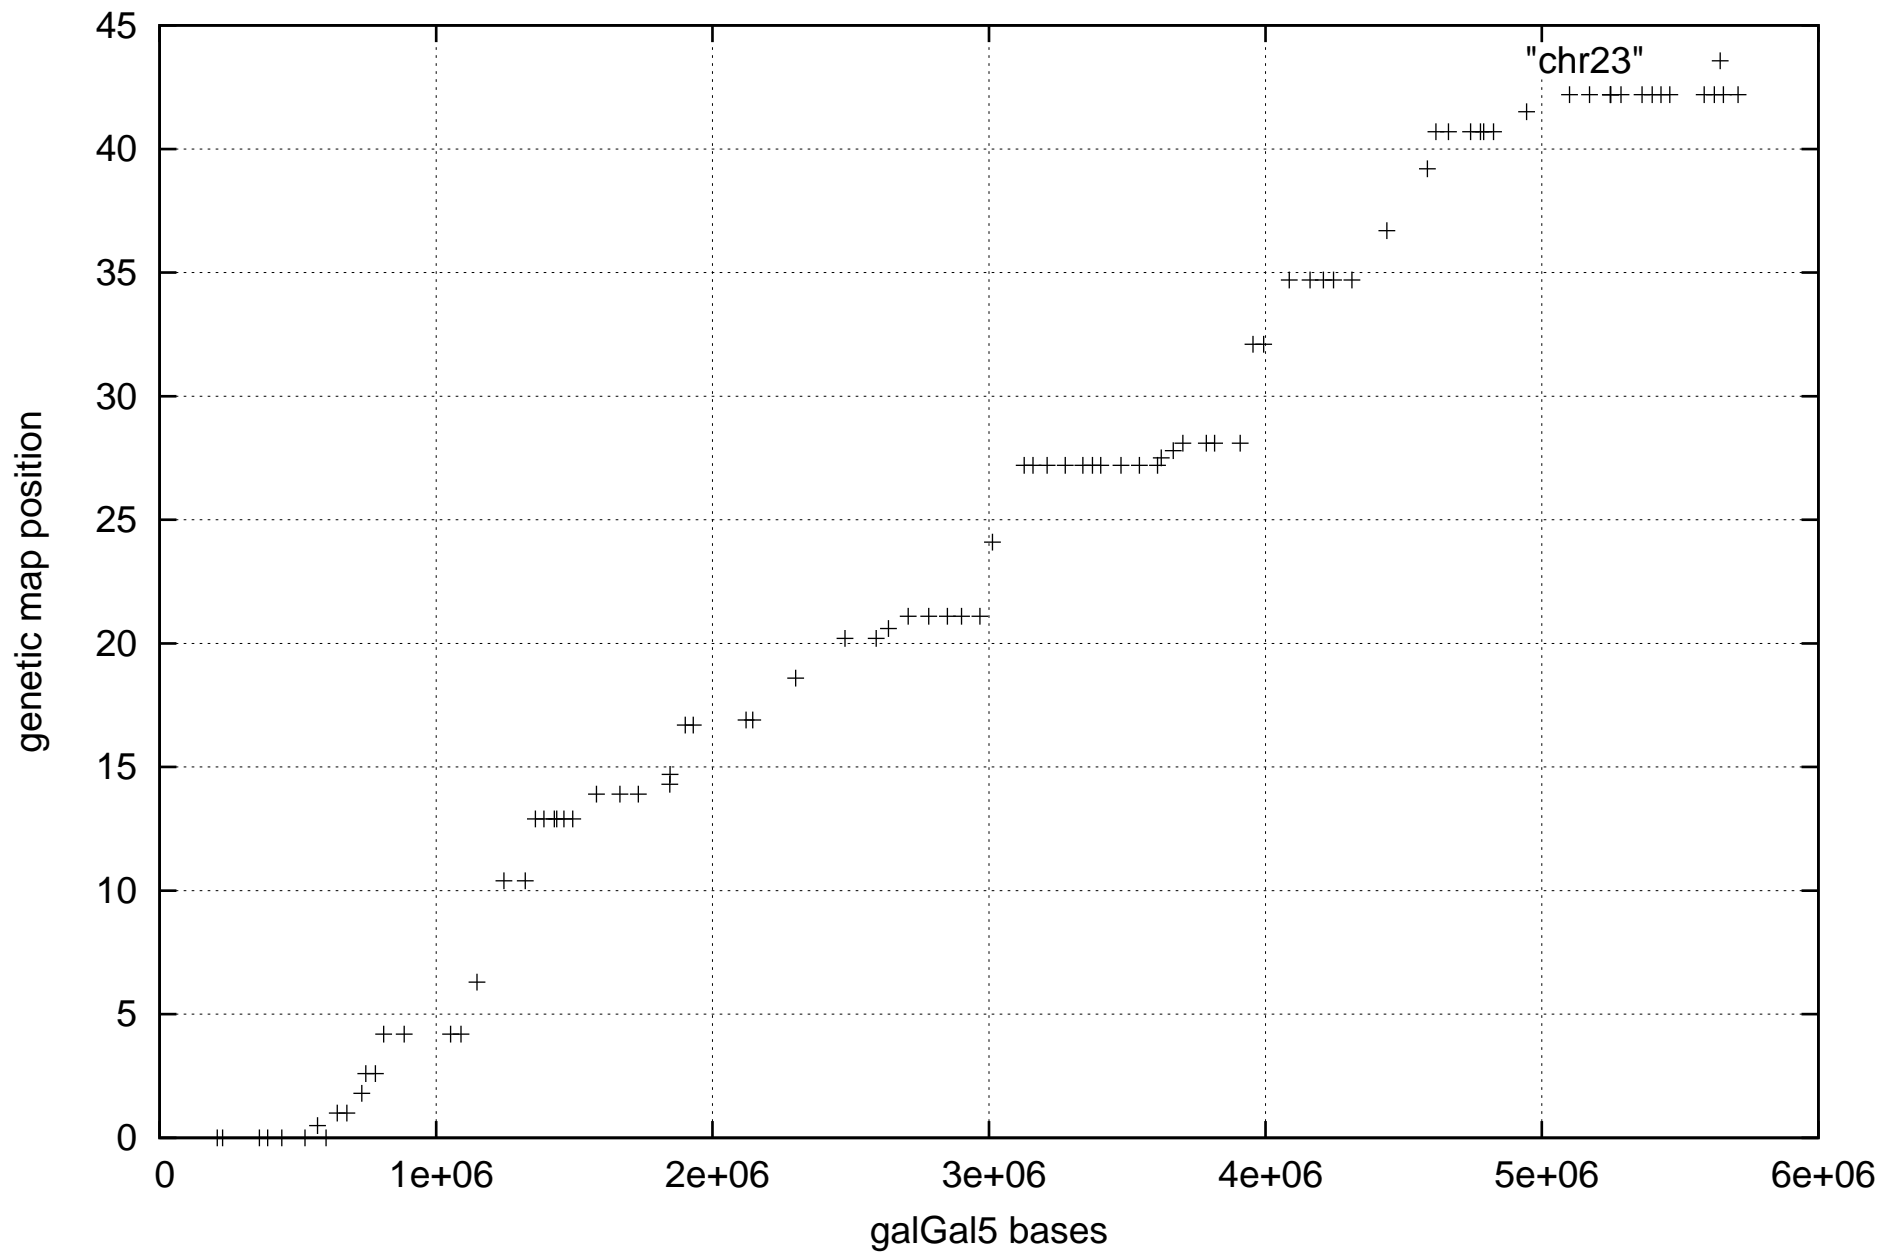

# galGal5 recombination

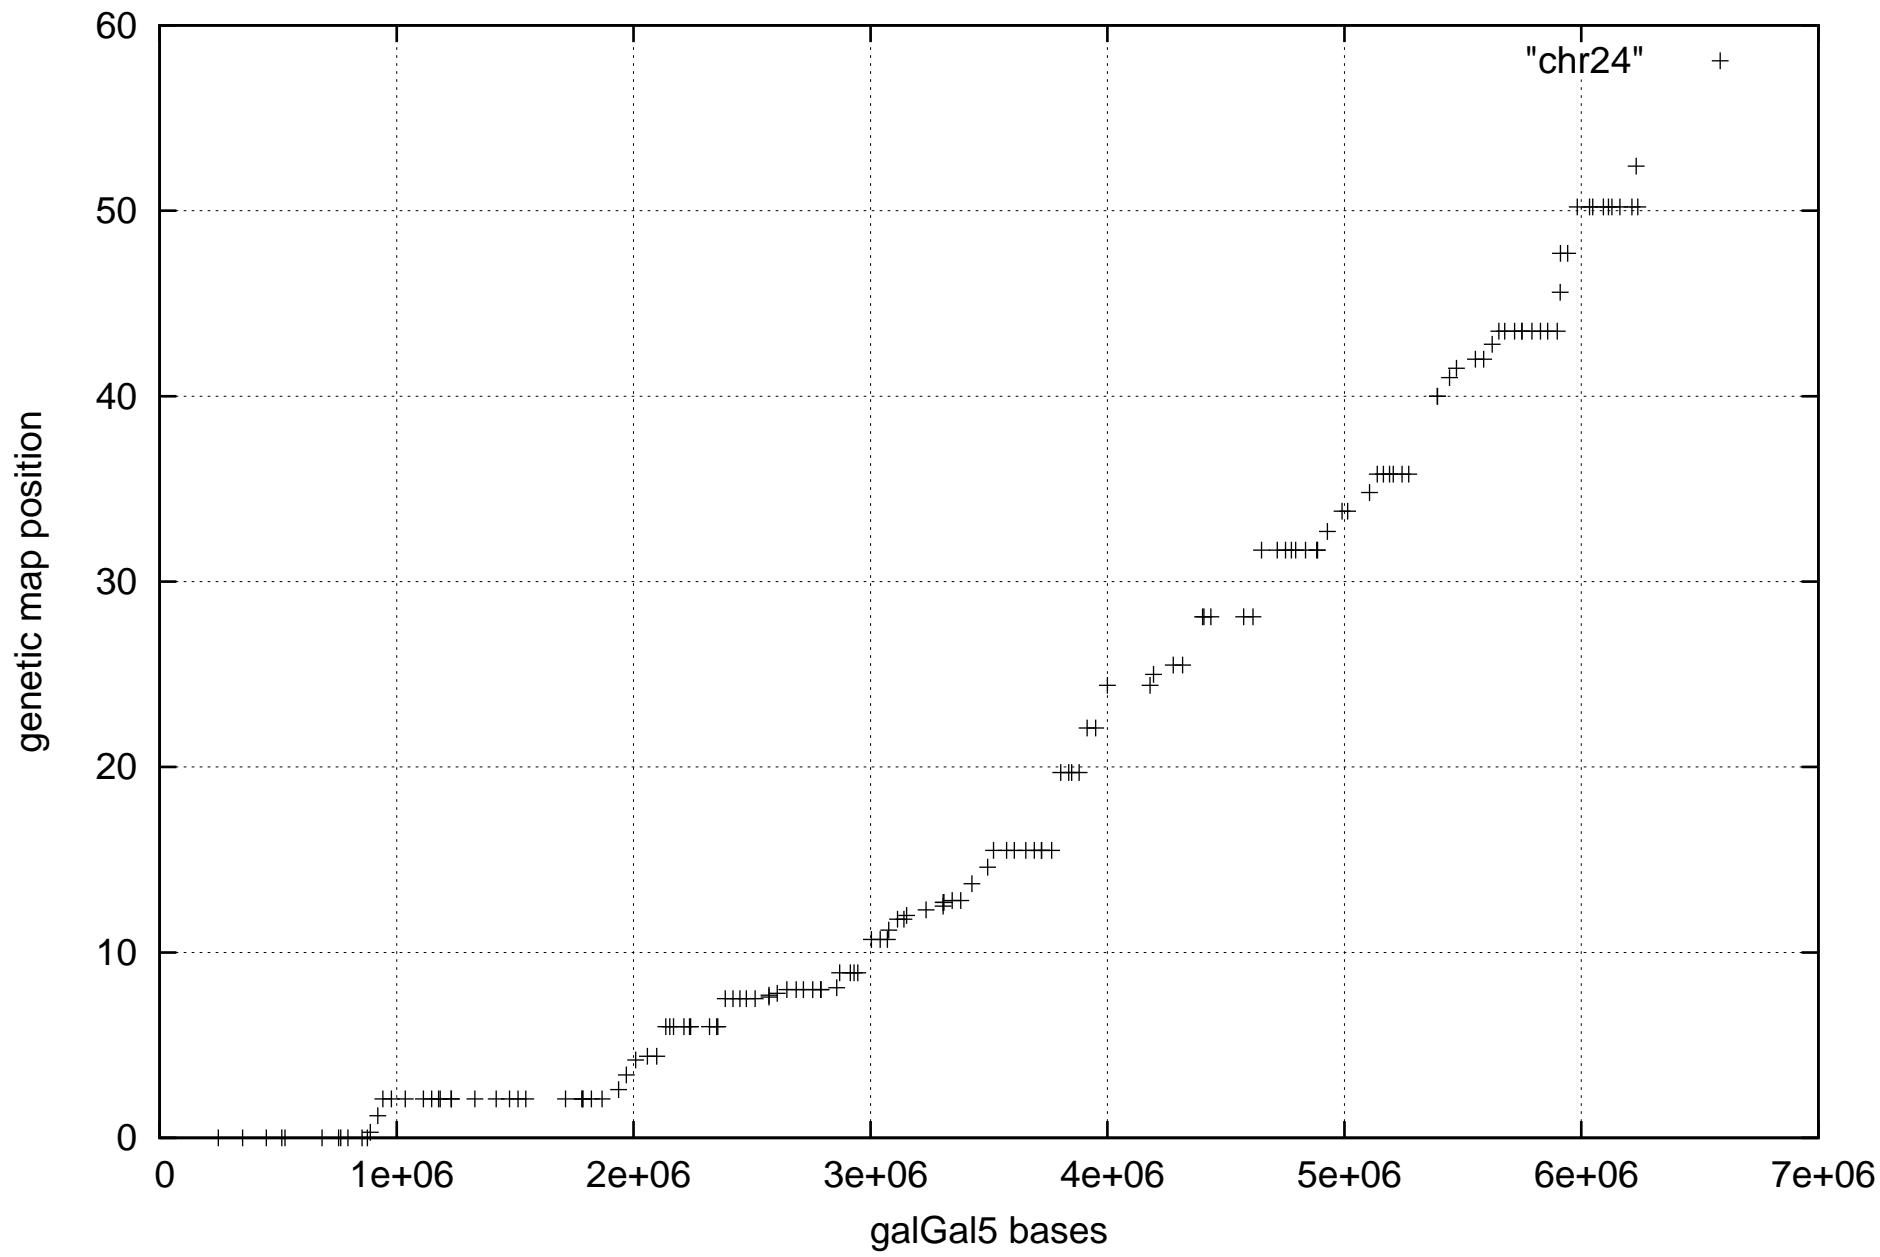

galGal5 recombination

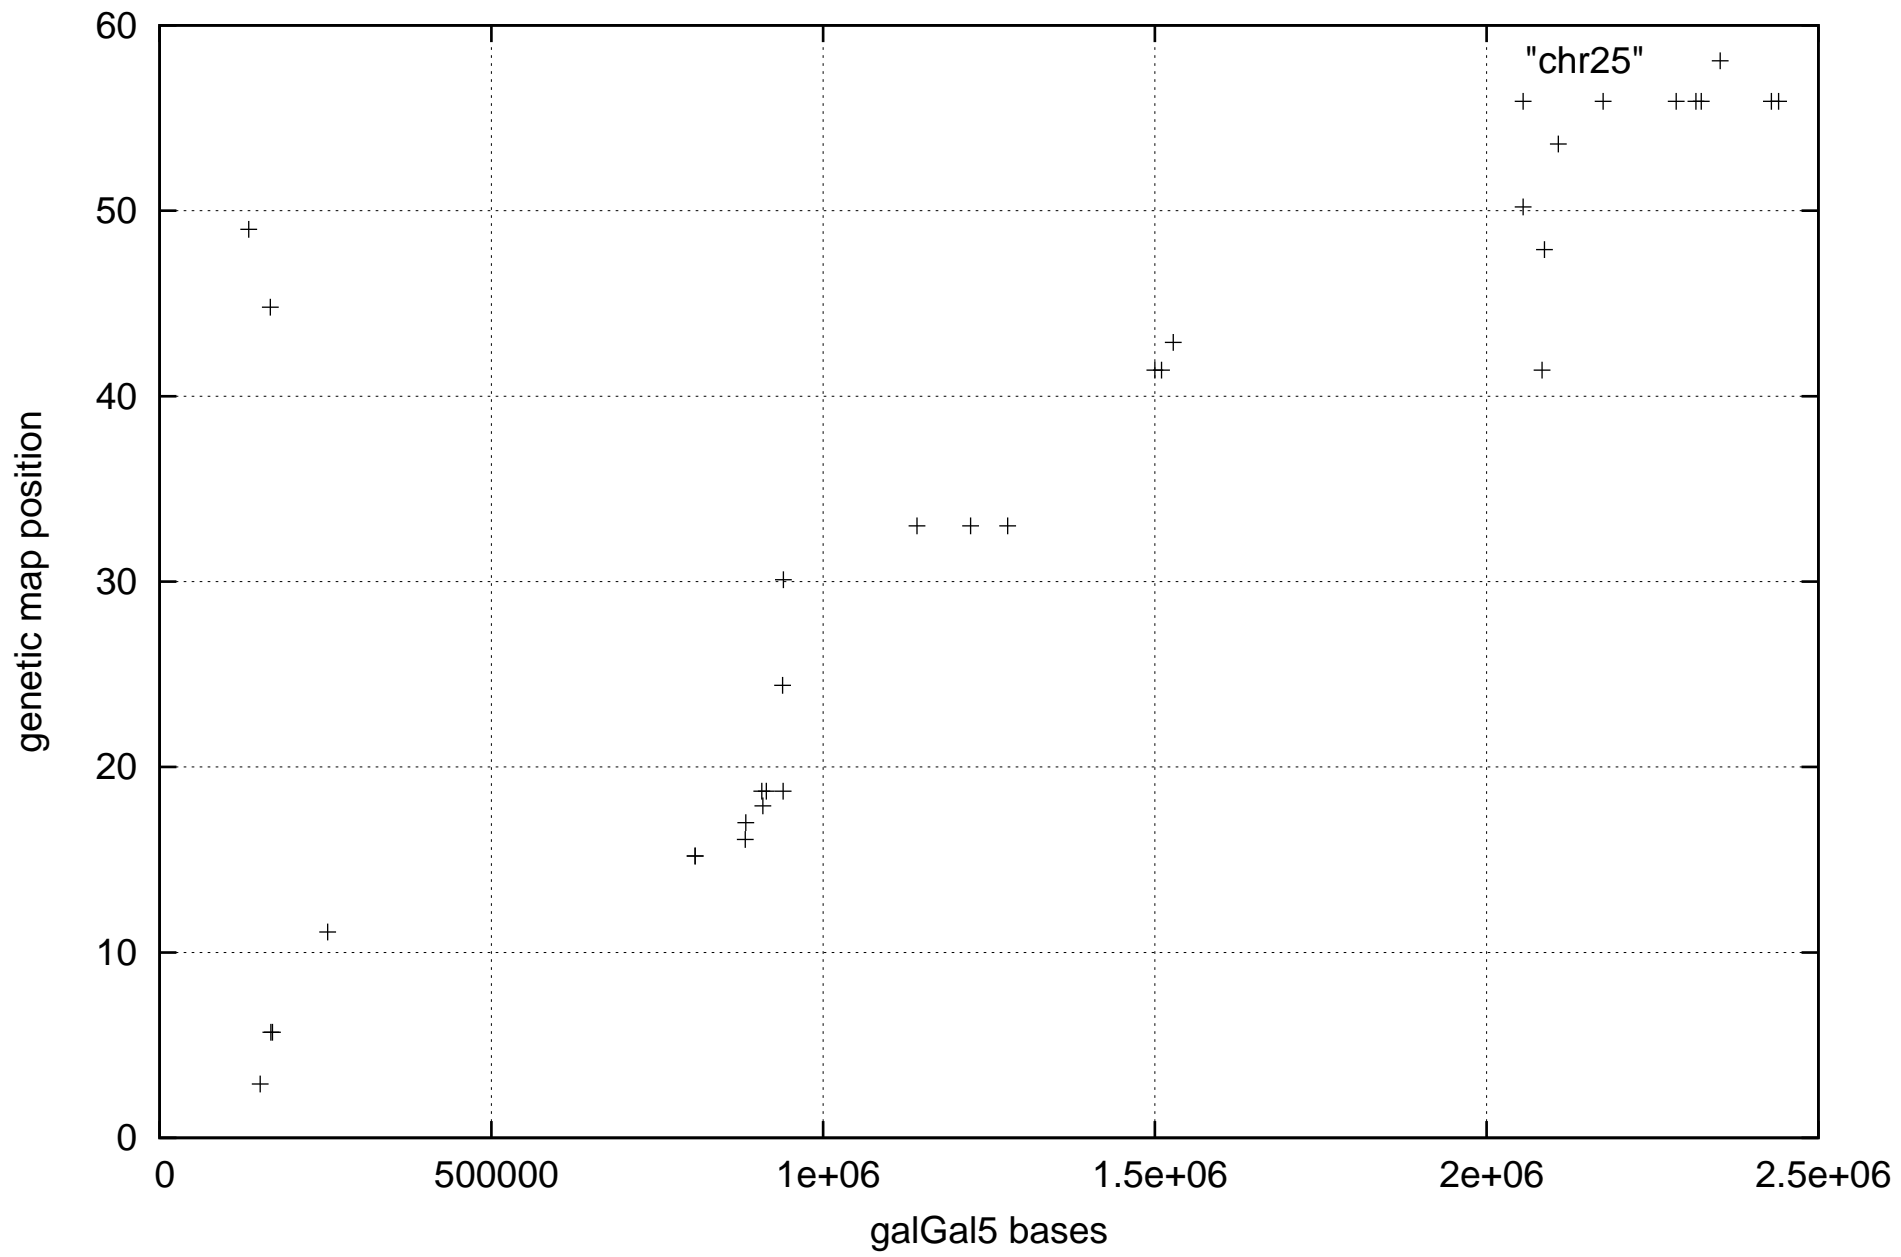



# galGal5 recombination

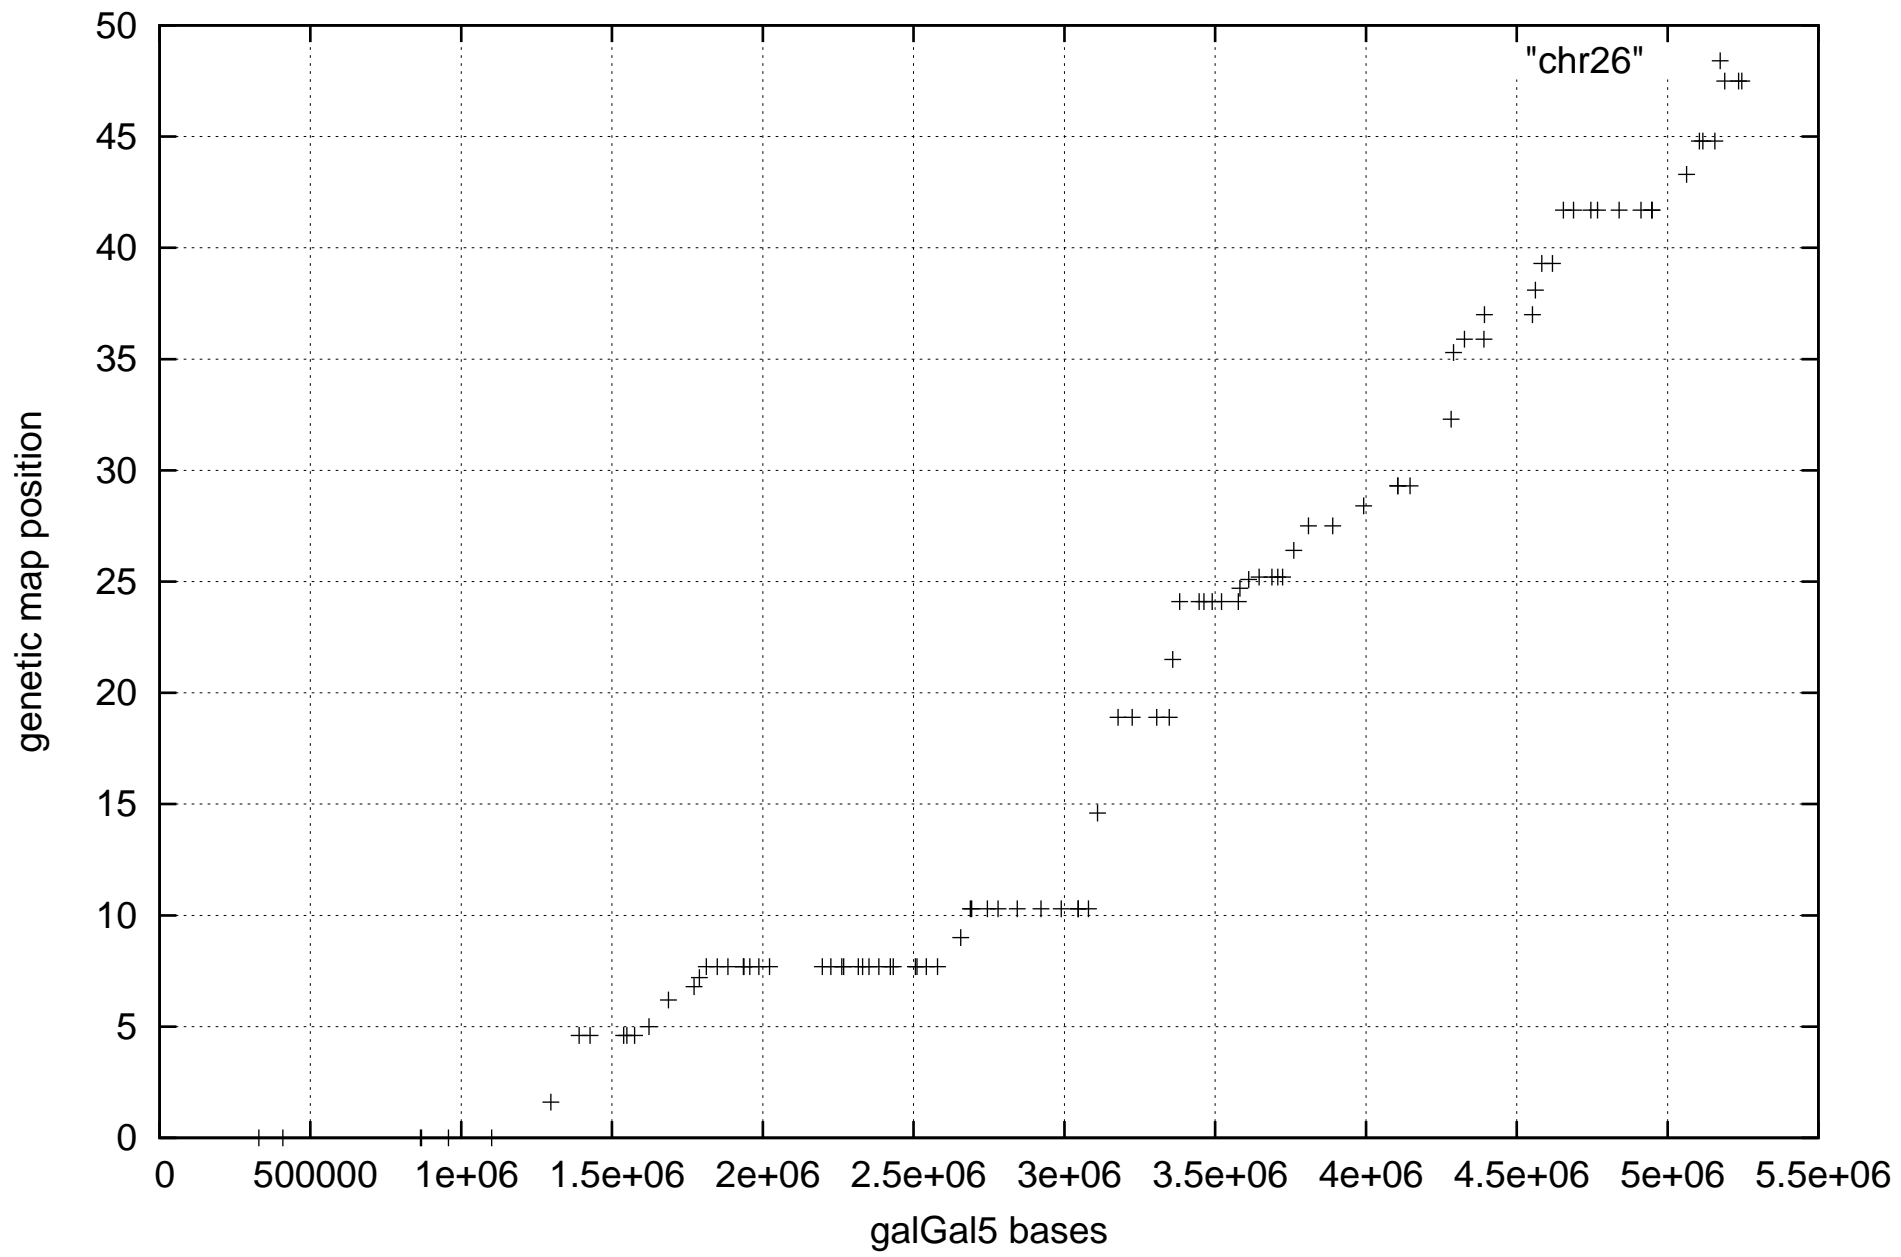

# galGal5 recombination

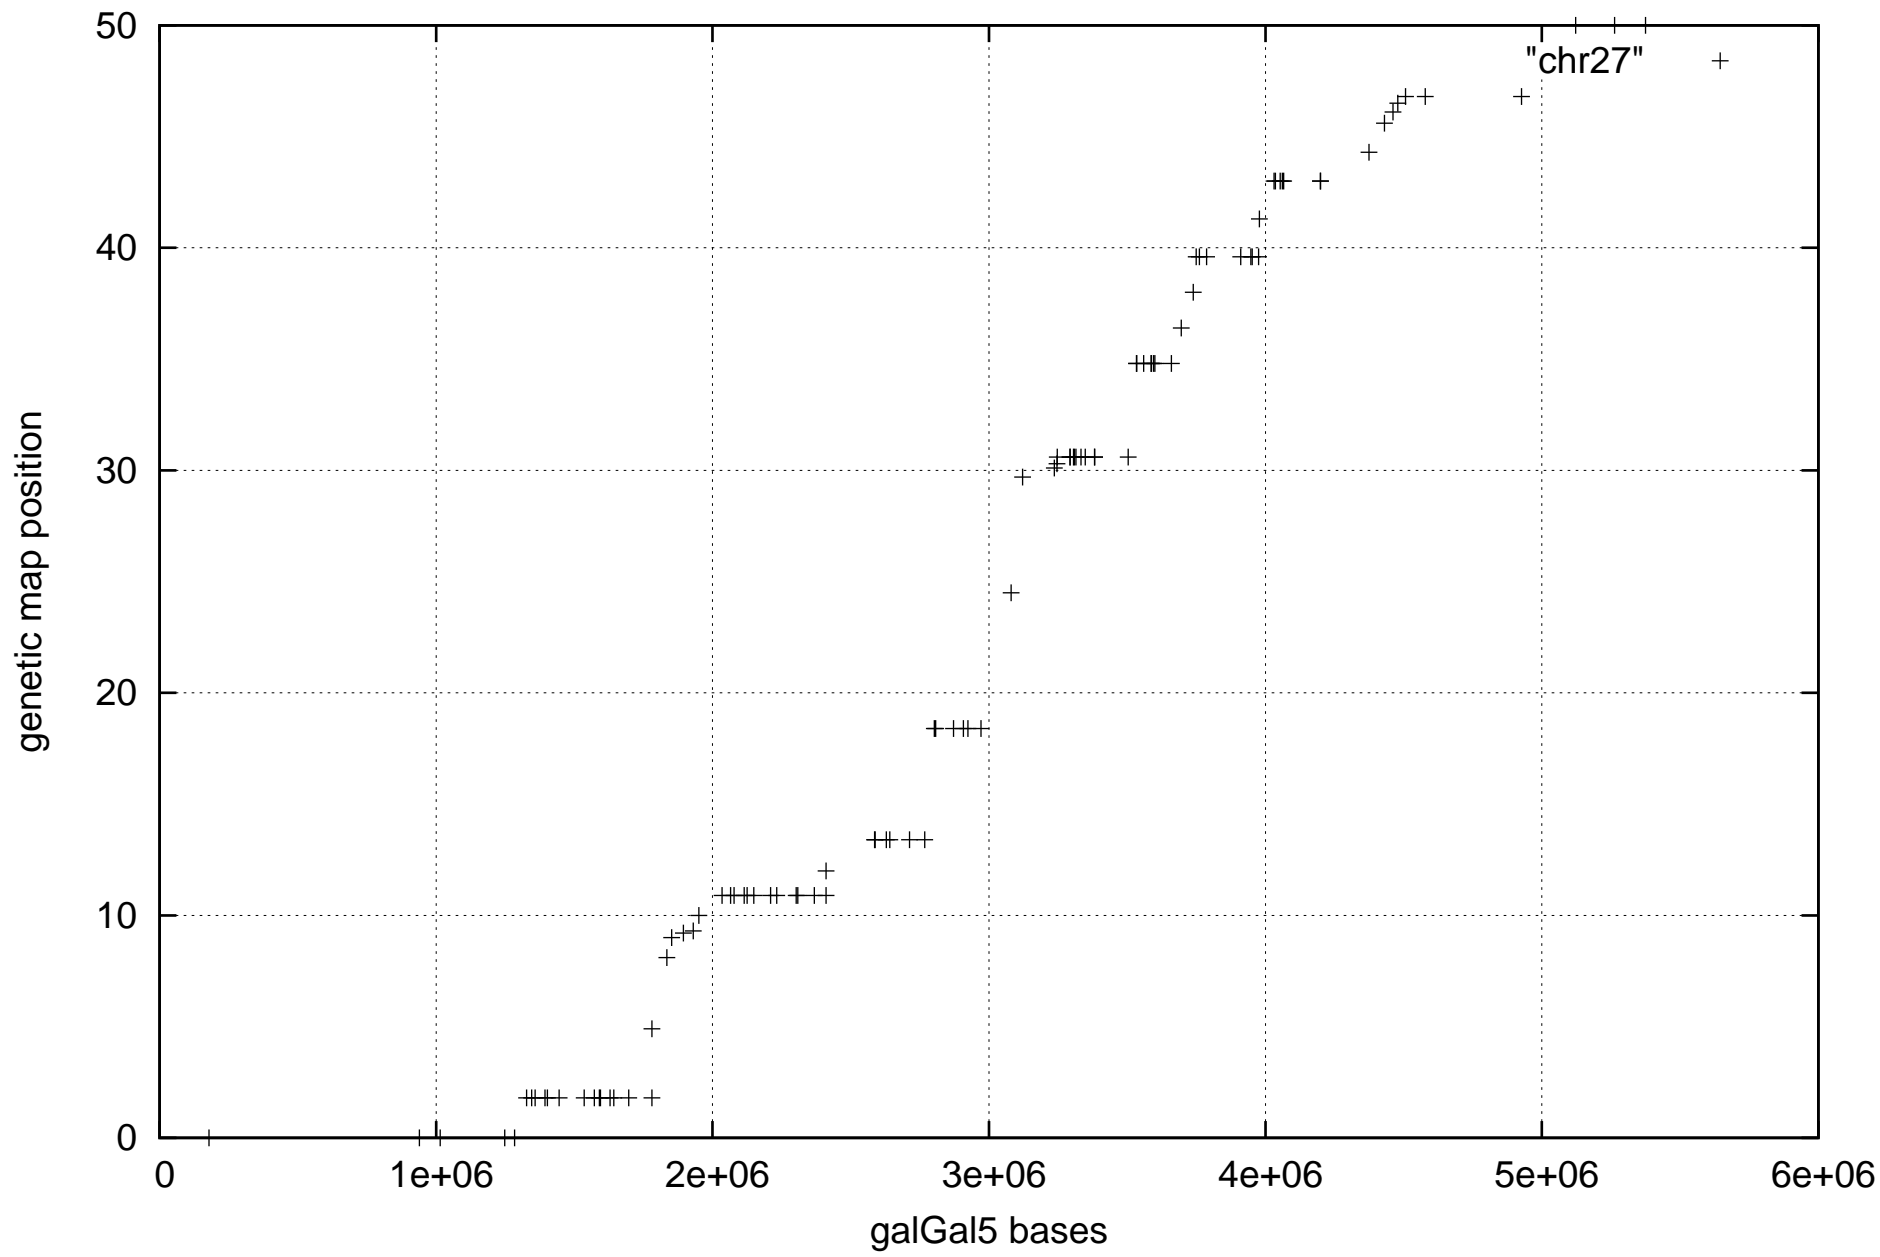

# galGal5 recombination

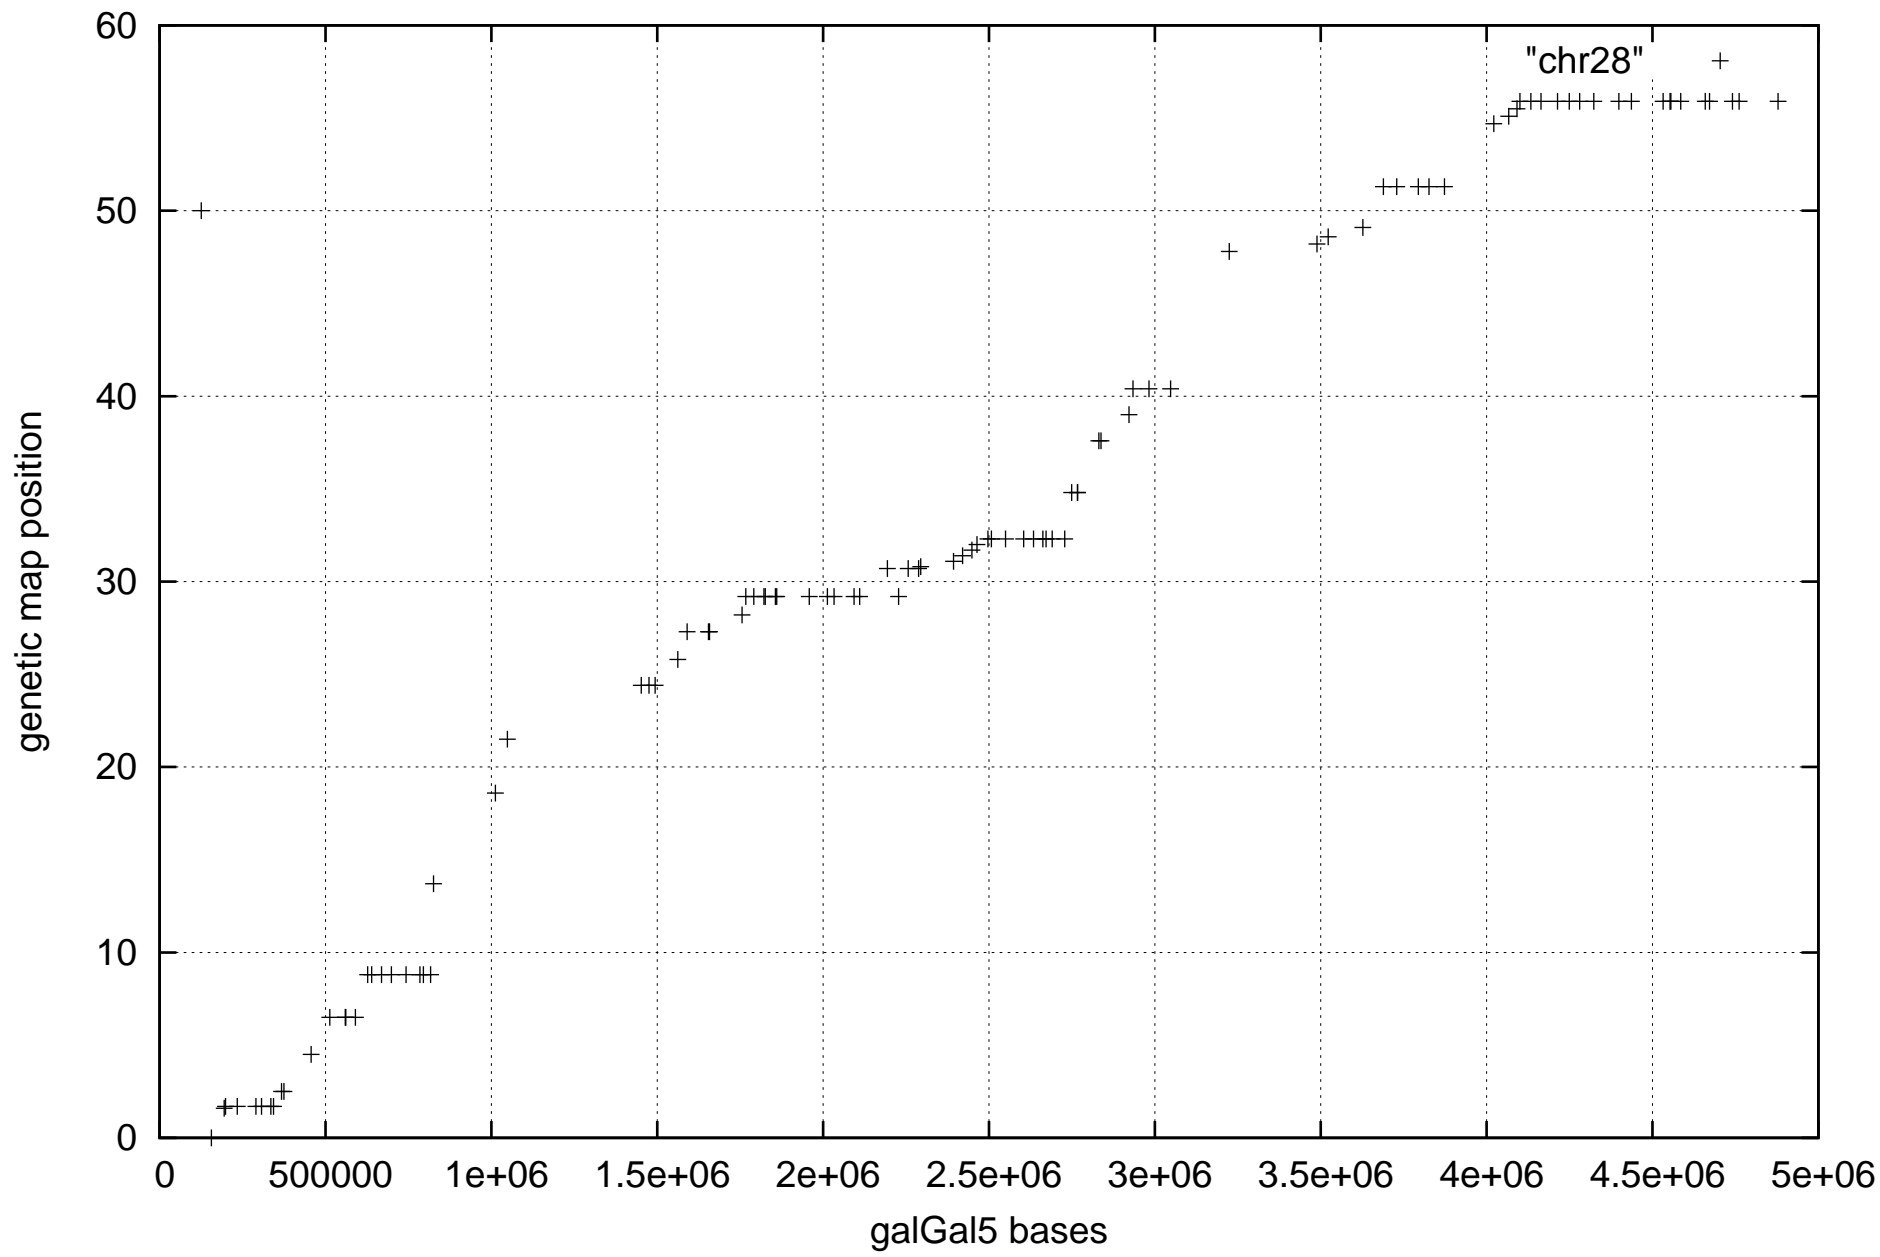

Supplement: 109FileS3.pdf [file 109FileS3.pdf]
