# Supplementary material for: A New Chicken Genome Assembly Provides Insight into Avian Genome Structure
Source: PubMed Central journal article supplement (PMC5217101; doi:10.1534/g3.116.035923), 2016-11-14
Supplement: 109FileS9.pdf [file 109FileS9.pdf]

ILLUMINA (ILLUMINA) : E101

Backcross Stats, 95% Limit

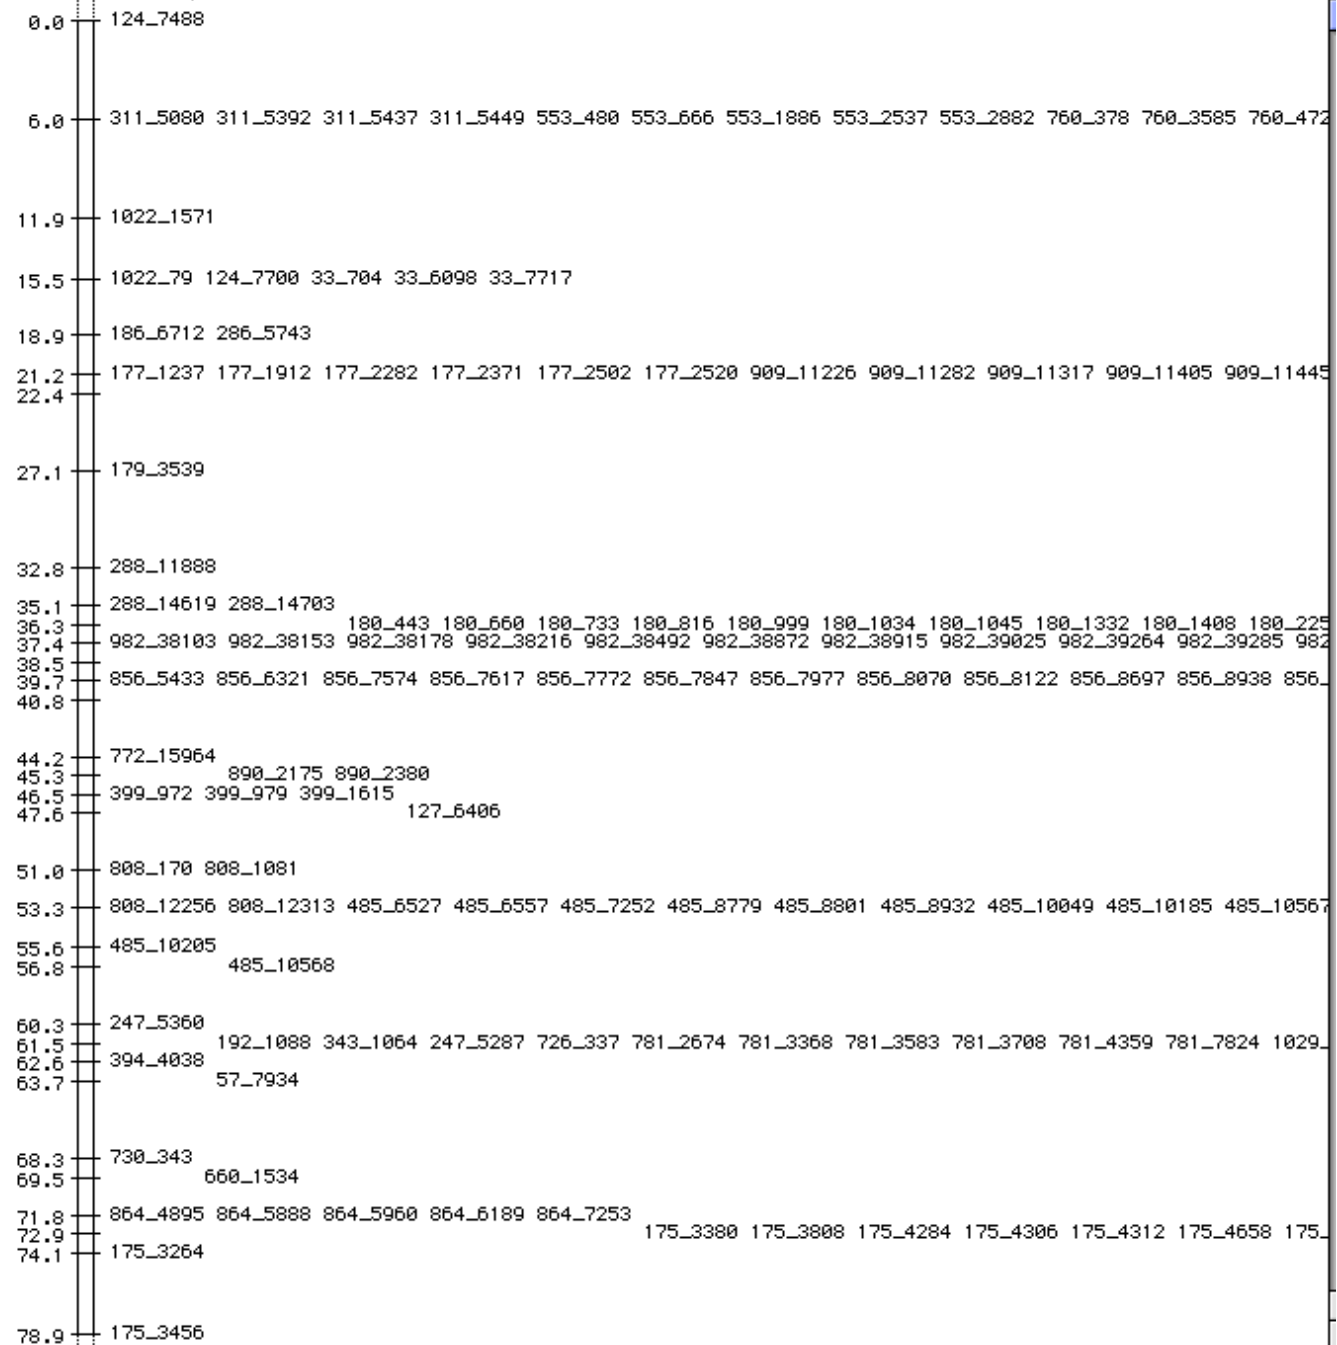



## Backcross Stats, 95% Limit

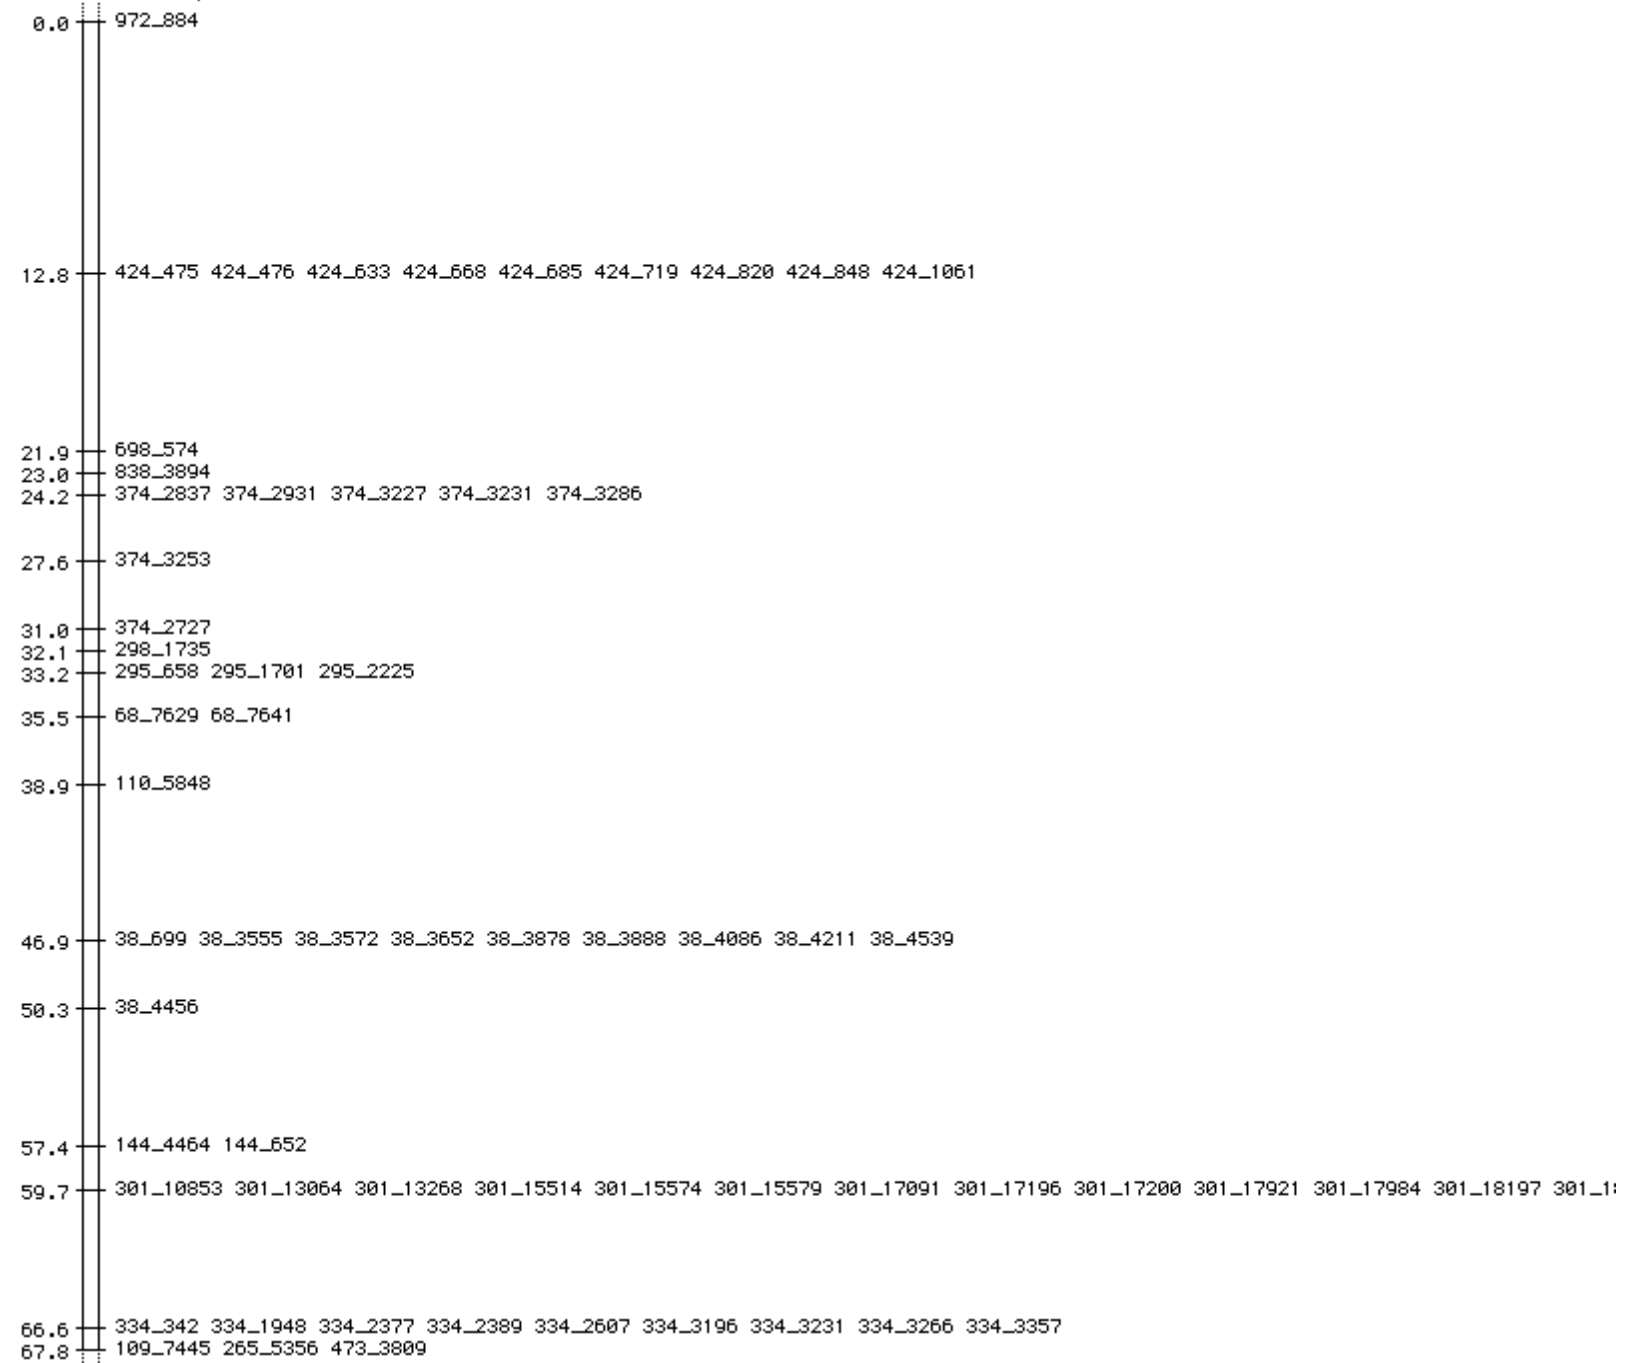

Backcross Stats, 95% Limit

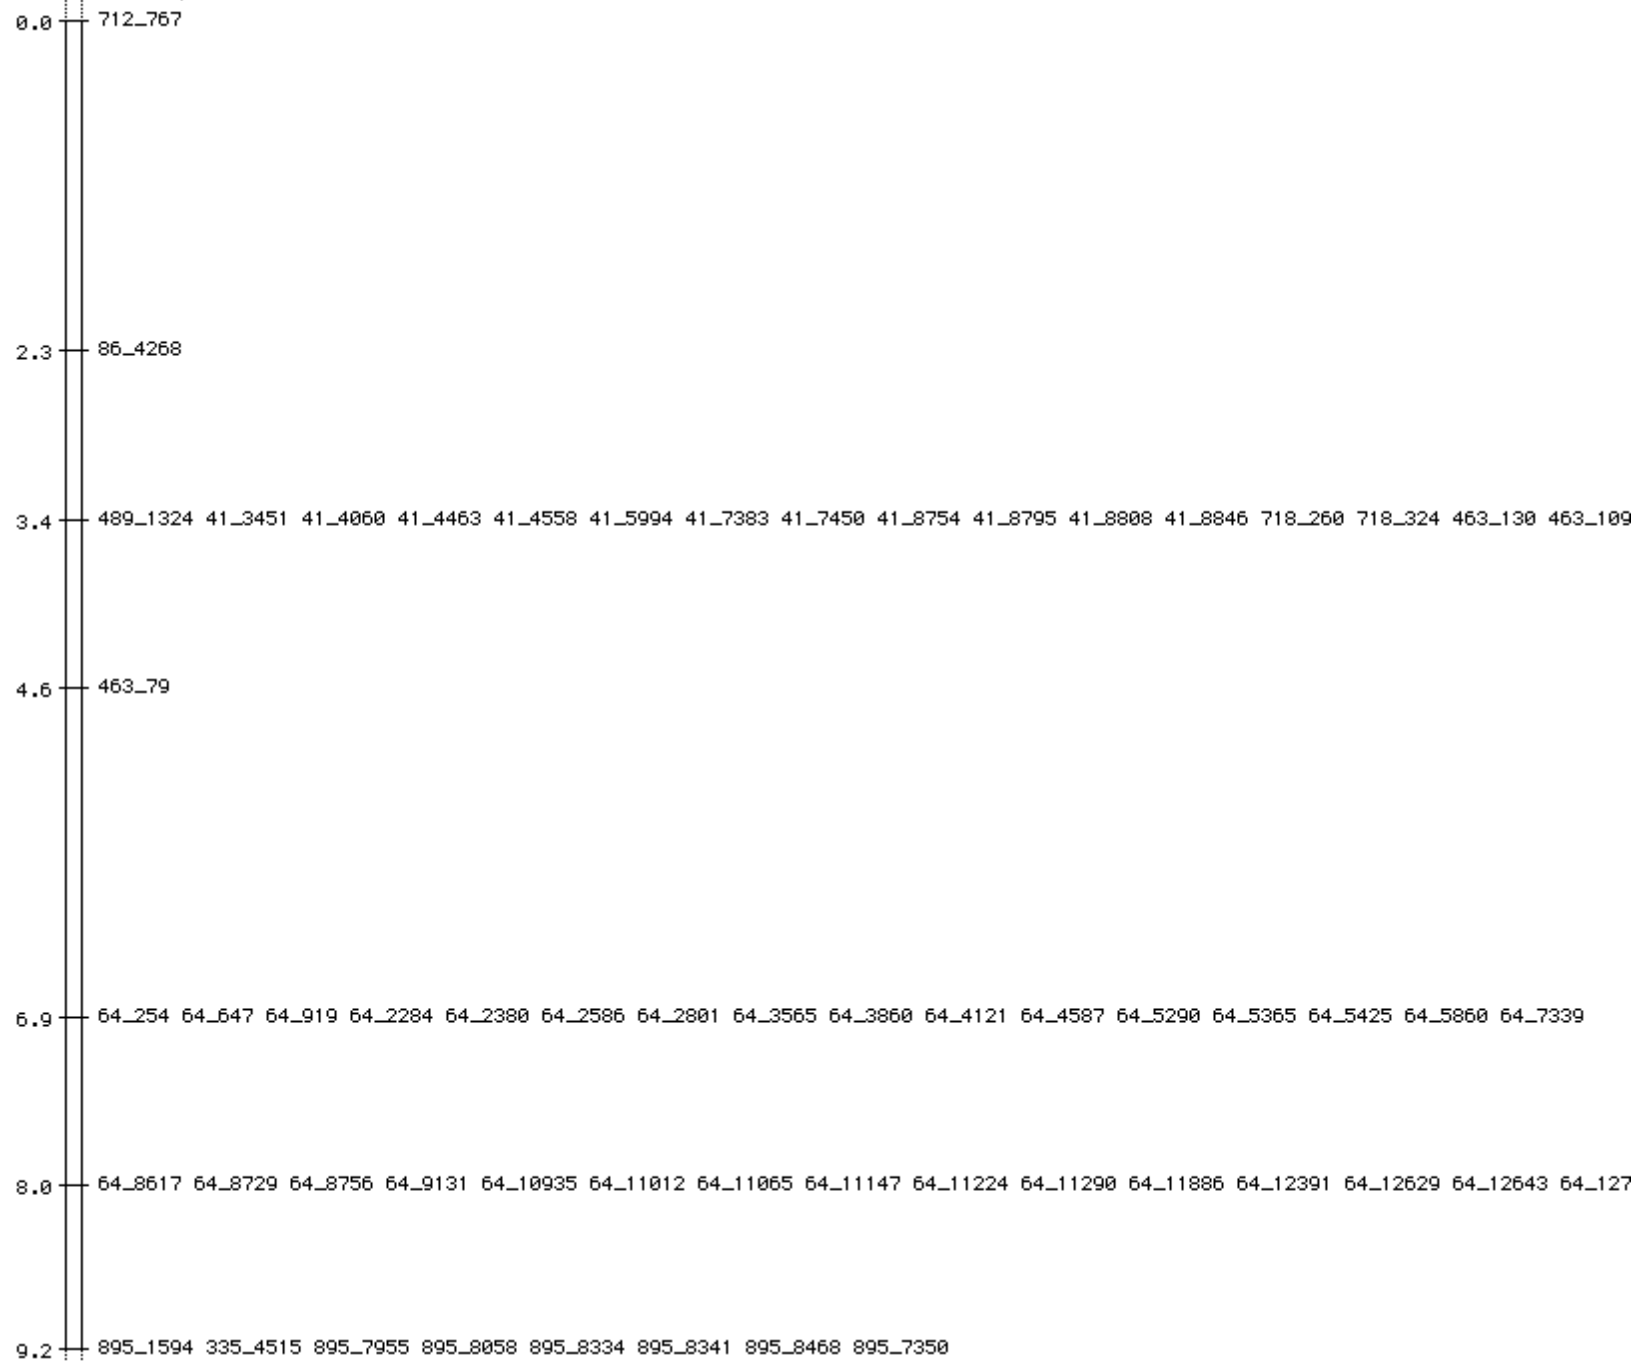

## Backcross Stats, 95% Limit

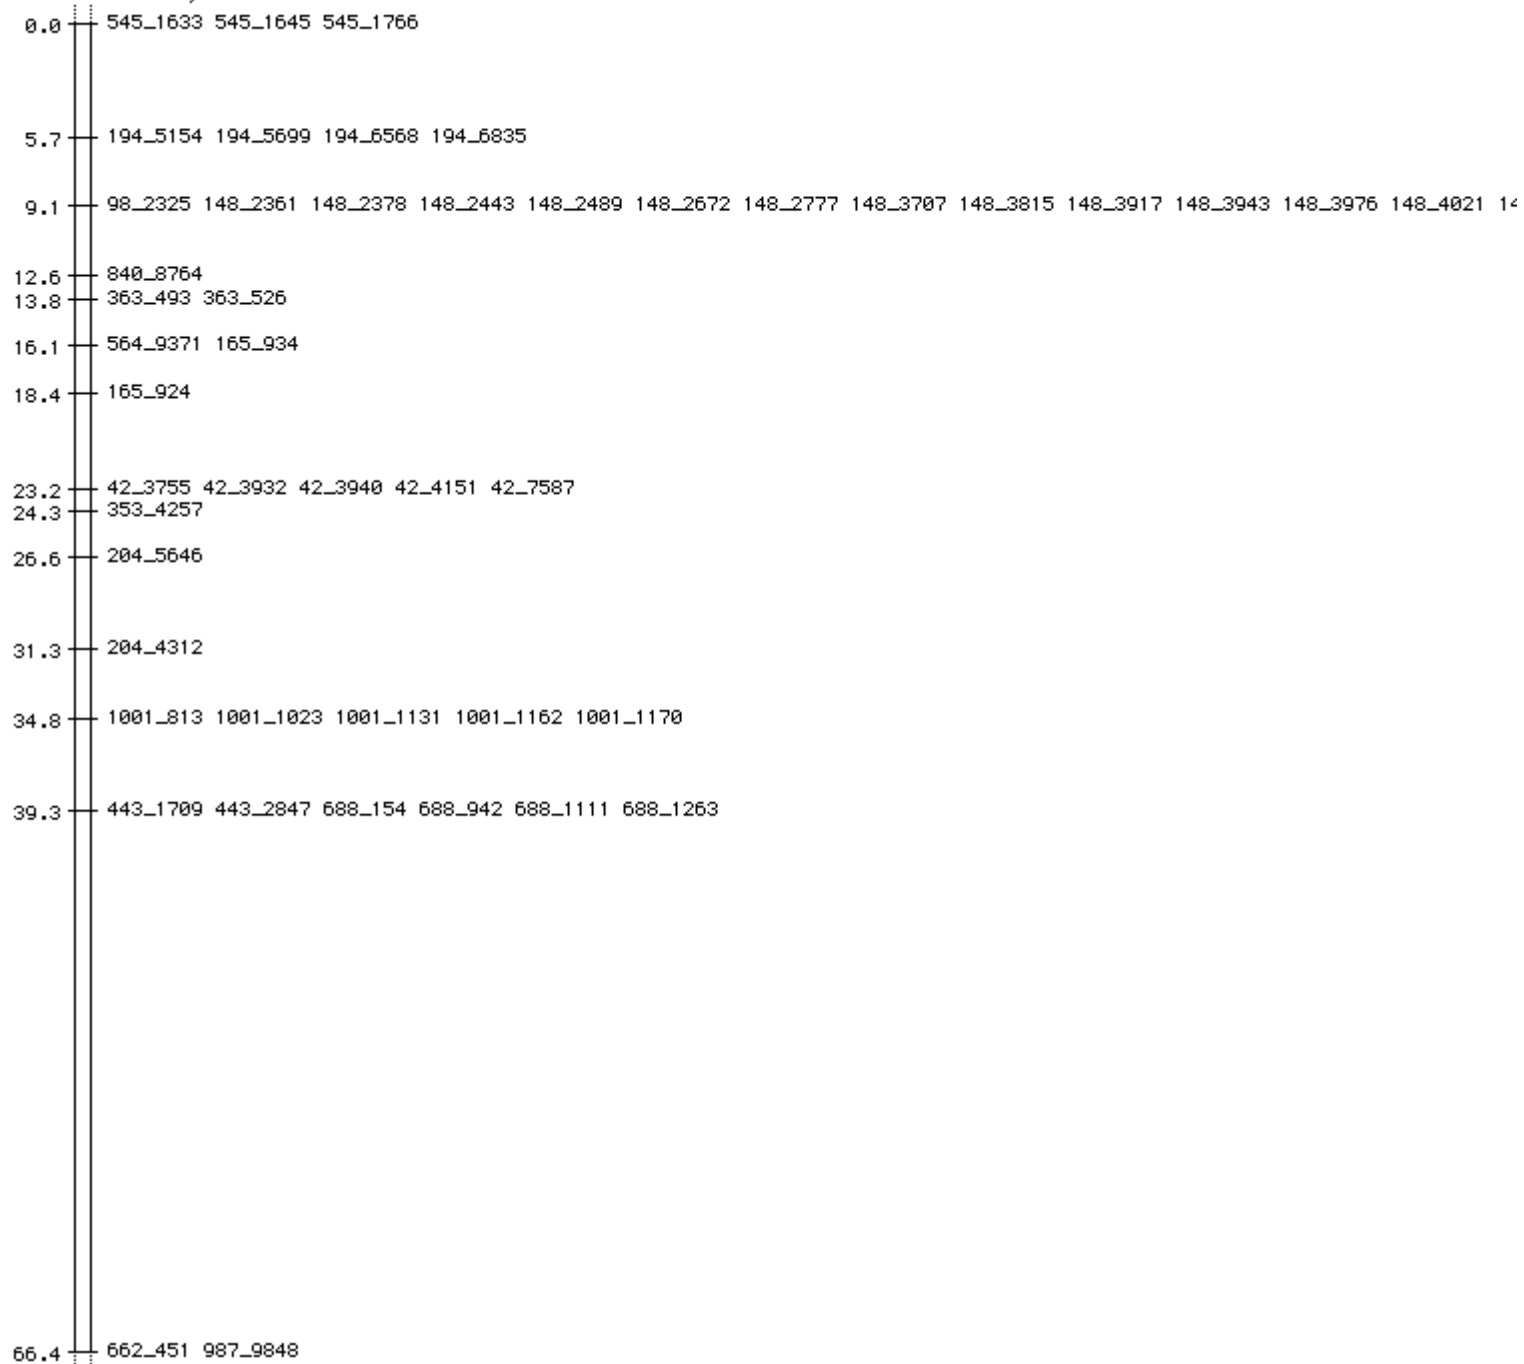

Backcross Stats, 95% Limit

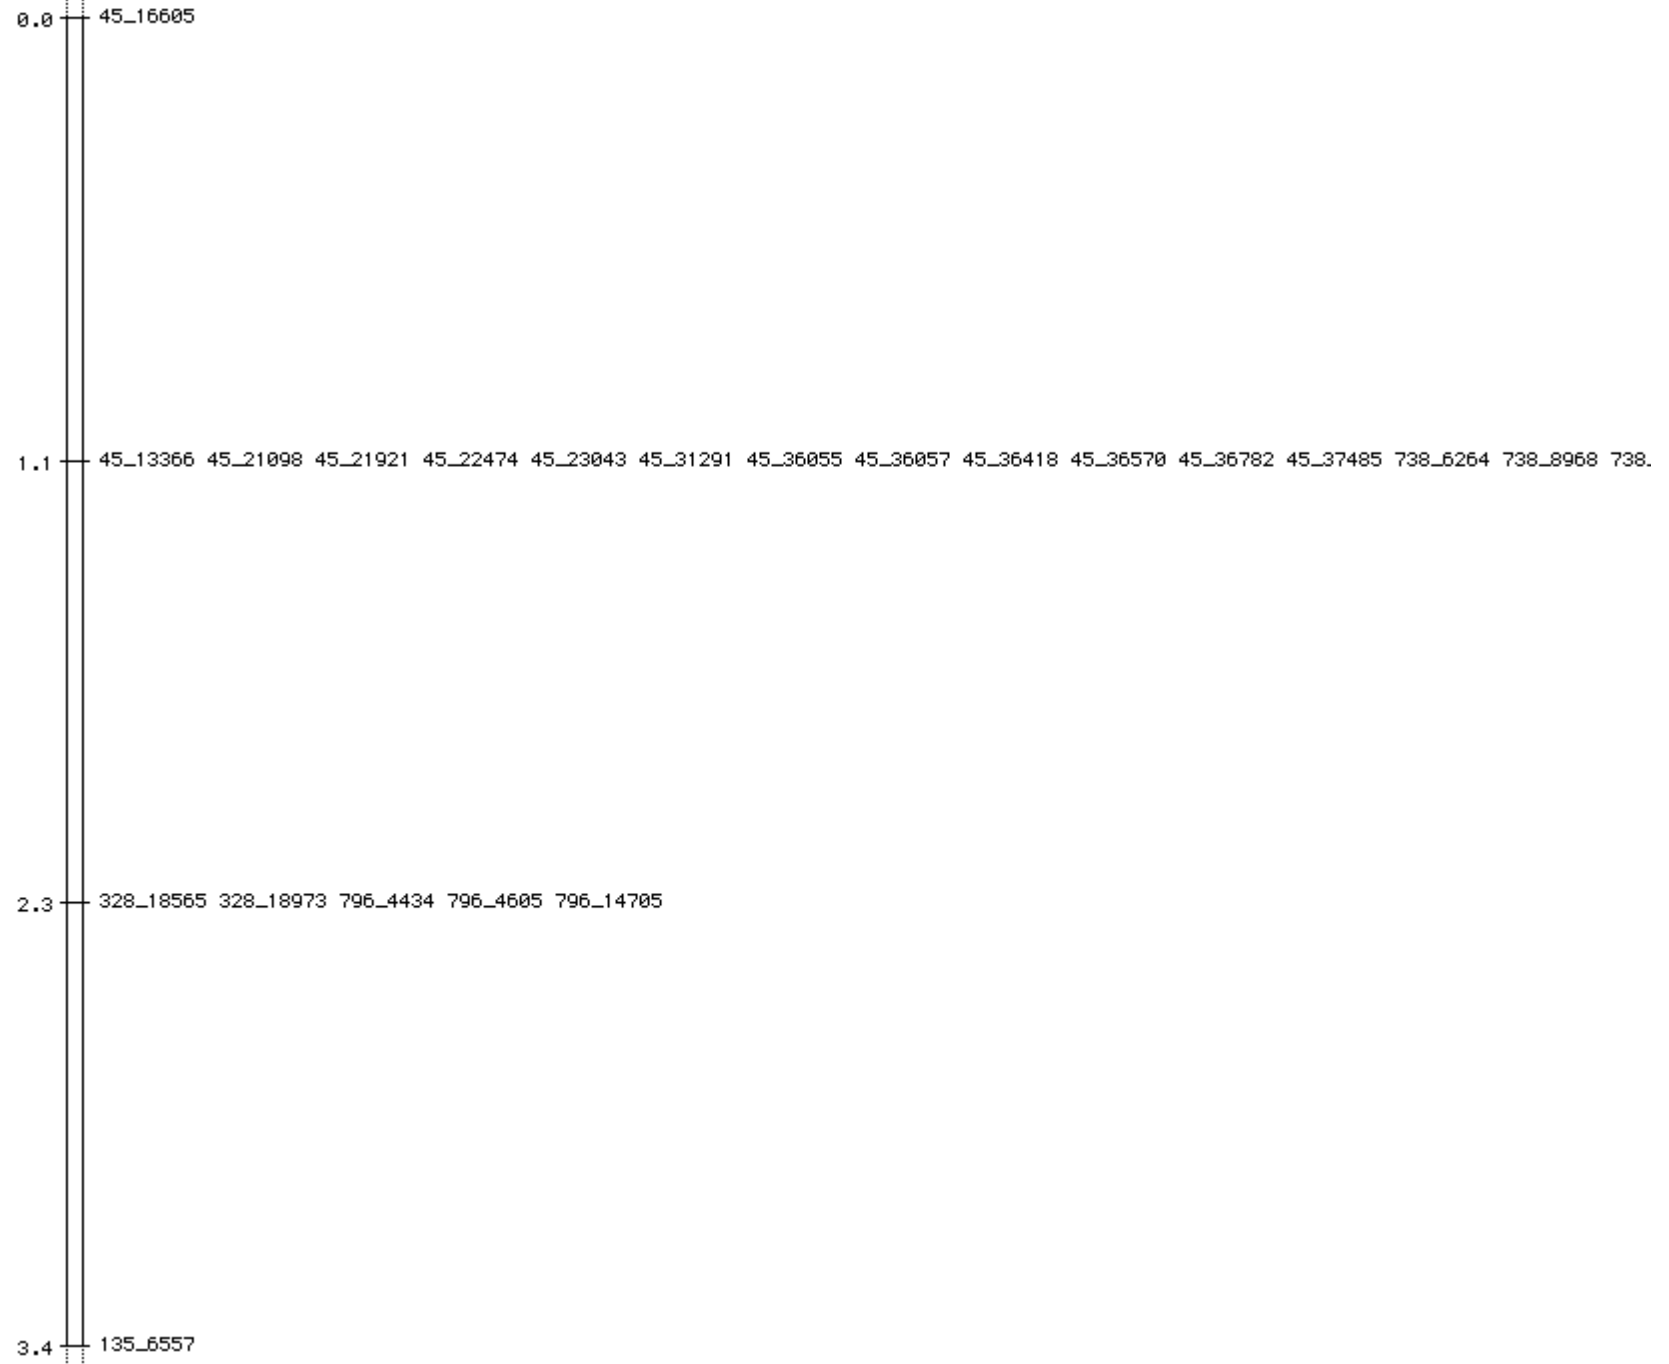

## Backcross Stats, 95% Limit

| Count | Sample IDs                                                                                                                      |
|-------|---------------------------------------------------------------------------------------------------------------------------------|
| 0.0   | 367_4617 367_4646 367_4835 547_1246                                                                                             |
| 1.1   | 185_832                                                                                                                         |
| 2.3   | 118_5116 556_413 556_481 556_635 787_4629                                                                                       |
| 3.4   | 592_1107                                                                                                                        |
| 9.1   | 305_2617 305_2829 462_684 492_1113 492_1711 492_1909                                                                            |
| 28.4  | 164_6023 415_1817                                                                                                               |
| 33.0  | 229_9053                                                                                                                        |
| 35.2  | 229_9571 229_19453 229_19472 388_3371 388_3440 388_3513 388_3579 753_2962 753_9020 753_9095 863_5298 863_5299                   |
| 40.9  | 84_6791 84_7519 506_1009                                                                                                        |
| 43.2  | 51_12268                                                                                                                        |
| 44.3  | 51_14437 51_11050 51_11457 51_11471 51_11575 51_11608 51_11744 51_12294 51_12896 51_12921 51_12939 51_13024 51_13126 51_13202 5 |
| 45.5  | 51_36318                                                                                                                        |
| 47.7  | 515_2484 515_2725 515_2777                                                                                                      |
| 50.0  | 74_8675 283_214 1028_13308 1028_13575 1028_14232 1028_14268 1028_14759 1028_35168 1028_39011 1028_39474 1028_39718              |
| 51.2  | 601_1394 601_1713                                                                                                               |
| 52.3  | 58_5420 114_5532 832_6756 832_6877                                                                                              |
| 53.5  | 832_2289 832_2370 832_2424 832_2561 832_3105 832_3336 966_2410 966_5793 966_7766 966_7895 966_8016 966_8225                     |
| 54.6  | 966_5049                                                                                                                        |

## Backcross Stats, 95% Limit

|      |                                                                                                                                |
|------|--------------------------------------------------------------------------------------------------------------------------------|
| 0.0  | 535_10920                                                                                                                      |
| 2.3  | 535_88 535_5904 535_10110 535_10248 535_10409 535_10531 535_10776 535_10829 535_10897 535_11237 535_11398 535_11515 535_11515  |
| 5.7  | 408_10676                                                                                                                      |
| 10.4 | 408_3340                                                                                                                       |
| 13.9 | 408_2716 408_2766 408_3128 408_3136 408_3164 408_3189 408_3250 408_3298 408_3343 408_3540 408_3702 408_7035 408_7567 408_7567  |
| 15.1 |                                                                                                                                |
| 16.2 | 713_725 130_315 130_737 130_761 130_2321 130_2349 130_2352 130_2461 130_3281 130_4686 130_4921 130_5694 130_7071 52_486 52_486 |
| 17.3 | 981_8874 96_3870 423_2019 460_181 460_1357 587_123 587_366 587_437 691_354 870_2341 870_4131 870_4313 870_6284                 |
| 18.5 | 981_1609 96_1761 96_1738 396_289                                                                                               |
| 32.1 | 577_695 577_708                                                                                                                |
| 33.3 | 115_416 115_460 115_614 115_803 115_4812 115_4815 115_5704 115_6124 115_7199 115_7415 115_7428 115_7916                        |
| 34.4 | 115_8066                                                                                                                       |
| 37.9 | 216_2485                                                                                                                       |
| 40.1 | 906_4157 906_964 906_3023 906_3350 906_3731                                                                                    |
| 41.3 | 906_6984                                                                                                                       |
| 46.0 | 857_9326                                                                                                                       |
| 47.1 | 316_3120                                                                                                                       |
| 52.8 | 609_719 609_736 609_991                                                                                                        |
| 65.3 | 212_3995 242_1833                                                                                                              |
| 68.8 | 242_1739                                                                                                                       |



## Backcross Stats, 95% Limit

|      |                                                                                                                                      |
|------|--------------------------------------------------------------------------------------------------------------------------------------|
| 0.0  | 546_2070                                                                                                                             |
| 4.6  | 213_426 213_1777 213_4456 213_5187 213_6437 213_6460 379_2241                                                                        |
| 5.8  | 252_5249 704_7343 704_7448 704_7527                                                                                                  |
| 8.1  | 333_1712                                                                                                                             |
| 9.2  | 333_3763 333_4551 333_4552 333_4572 333_4830 333_4848 333_4872 333_4892 333_5276                                                     |
| 10.3 | 441_703                                                                                                                              |
| 12.6 | 378_358 378_1015                                                                                                                     |
| 14.9 | 792_8883 792_8909 792_8915                                                                                                           |
| 16.0 | 792_13459                                                                                                                            |
| 18.3 | 811_3375 811_3400 811_3632                                                                                                           |
| 19.4 | 231_2985 303_3014 321_681 321_690 321_737 321_937 321_975 321_1019 390_2798 390_2845 390_2896 390_3110 390_3889 390_3961             |
| 20.6 | 390_3722                                                                                                                             |
| 22.9 | 548_1848                                                                                                                             |
| 24.1 | 548_1867 548_1988 548_1990 548_2183 548_2208 548_2541 548_2547 548_2668                                                              |
| 25.2 | 1015_843 1015_2076 1015_2153 1015_2587 1015_4291 1015_5736 1015_5771 1015_5964 1015_5965 1015_6787 1015_6824 1015_8171 1015_8198     |
| 26.3 | 1015_2539                                                                                                                            |
| 27.5 | 991_1599                                                                                                                             |
| 28.6 | 991_1488 132_113 525_1050 616_1105 616_1112 651_1581                                                                                 |
| 32.1 | 54_702 54_1389 54_1410 309_277 310_2510                                                                                              |
| 33.2 | 312_1411 888_8053 888_8557 888_9954                                                                                                  |
| 34.4 | 456_2886 456_2984 456_3175 456_3759 1016_6801 1016_8554 1016_8836                                                                    |
| 36.6 | 169_11395                                                                                                                            |
| 37.8 | 169_10461 581_540 751_817 751_1130 751_1146 751_2572 751_4446 751_4561 751_4633 751_4635 751_5093 751_5555 751_5586 751_8595 751_101 |
| 38.9 | 169_6502                                                                                                                             |
| 40.1 | 169_1533 169_1566 169_1689 169_1693 169_1752 169_1776 169_1799 169_2175 169_2197 169_3739 169_3748 169_3889 169_3931 169_4008 169_43 |
| 41.2 | 169_11415 169_12379 169_16247 169_17210 169_17298                                                                                    |
| 42.4 | 169_15088                                                                                                                            |
| 44.6 | 497_3145 497_3183 497_3411 497_4081 497_5697 497_9779 497_11078 497_12274 497_13251 497_13260 497_15676 497_16067 497_16545 497_1659 |
| 51.7 | 617_710                                                                                                                              |

Backcross Stats, 95% Limit

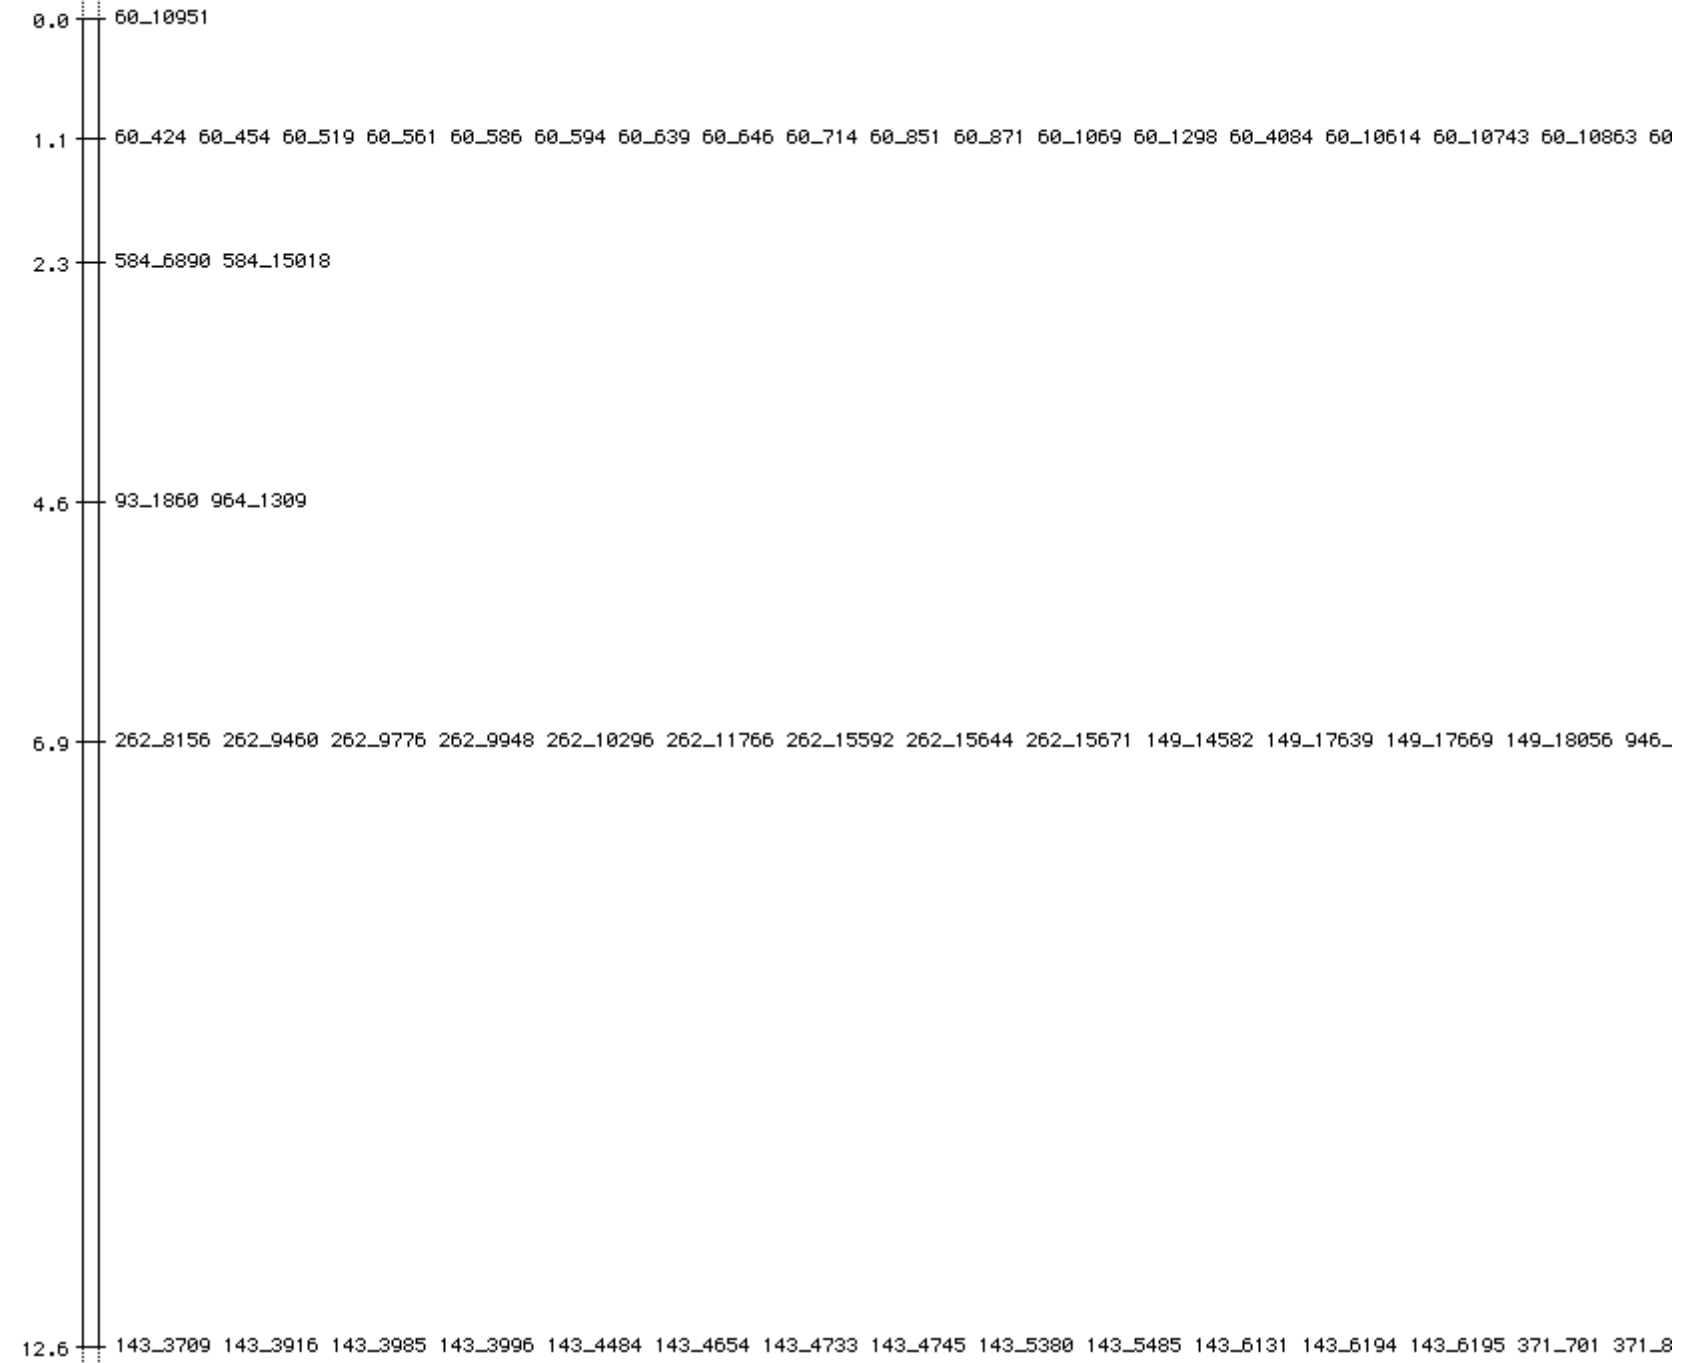

Backcross Stats, 95% Limit

0.0 829\_8910 829\_9190

21.6 829\_593 829\_608 829\_648 829\_1137 829\_1419 829\_2017 829\_2047 829\_2431 829\_2504 829\_3016 829\_3404 829\_5040 829\_5733 829\_6434 829\_6583 82

34.2 782\_722 782\_974 782\_1577 782\_3712 782\_3972 782\_4725

53.8 85\_3118 85\_5296 296\_636 296\_903 296\_1591 735\_640 735\_1494 735\_1846 735\_3299 735\_4872 735\_5529 735\_5549 735\_6161 735\_6529 735\_7451 735\_



Backcross Stats, 95% Limit

|      |          |          |                                                                                                                         |
|------|----------|----------|-------------------------------------------------------------------------------------------------------------------------|
| 0.0  | 387_601  | 387_941  | 387_1113                                                                                                                |
| 1.1  | 570_1110 | 570_1265 |                                                                                                                         |
| 11.4 | 614_703  | 614_755  | 614_768                                                                                                                 |
| 12.5 | 550_682  | 788_1620 | 788_1765 788_5013                                                                                                       |
| 35.4 | 99_4695  |          |                                                                                                                         |
| 36.6 | 99_27447 |          |                                                                                                                         |
| 37.7 | 99_3023  | 99_24691 | 99_24725 99_27487 99_27612 191_7216 191_7923 191_12266 191_13078 191_13572 191_13696 191_14721 191_27601 191_27656 191_ |
| 38.8 | 740_2975 | 740_3149 | 740_3163 740_3233 740_3556 740_3605 740_4001 740_4992 740_6007 740_6290 740_6546 799_7519                               |
| 40.0 | 799_1918 | 799_1970 |                                                                                                                         |
| 41.2 | 799_7587 | 799_8307 | 799_10176 799_10311 799_10371 799_10410 799_10538 799_10585 799_11437 799_11446 799_14956                               |
| 42.3 | 743_5690 | 743_5738 | 743_10771 743_11135 743_11237 717_316 967_3522                                                                          |
| 57.1 | 551_1463 | 693_268  | 866_2581 866_7847 866_7975 866_10377                                                                                    |

## Backcross Stats, 95% Limit

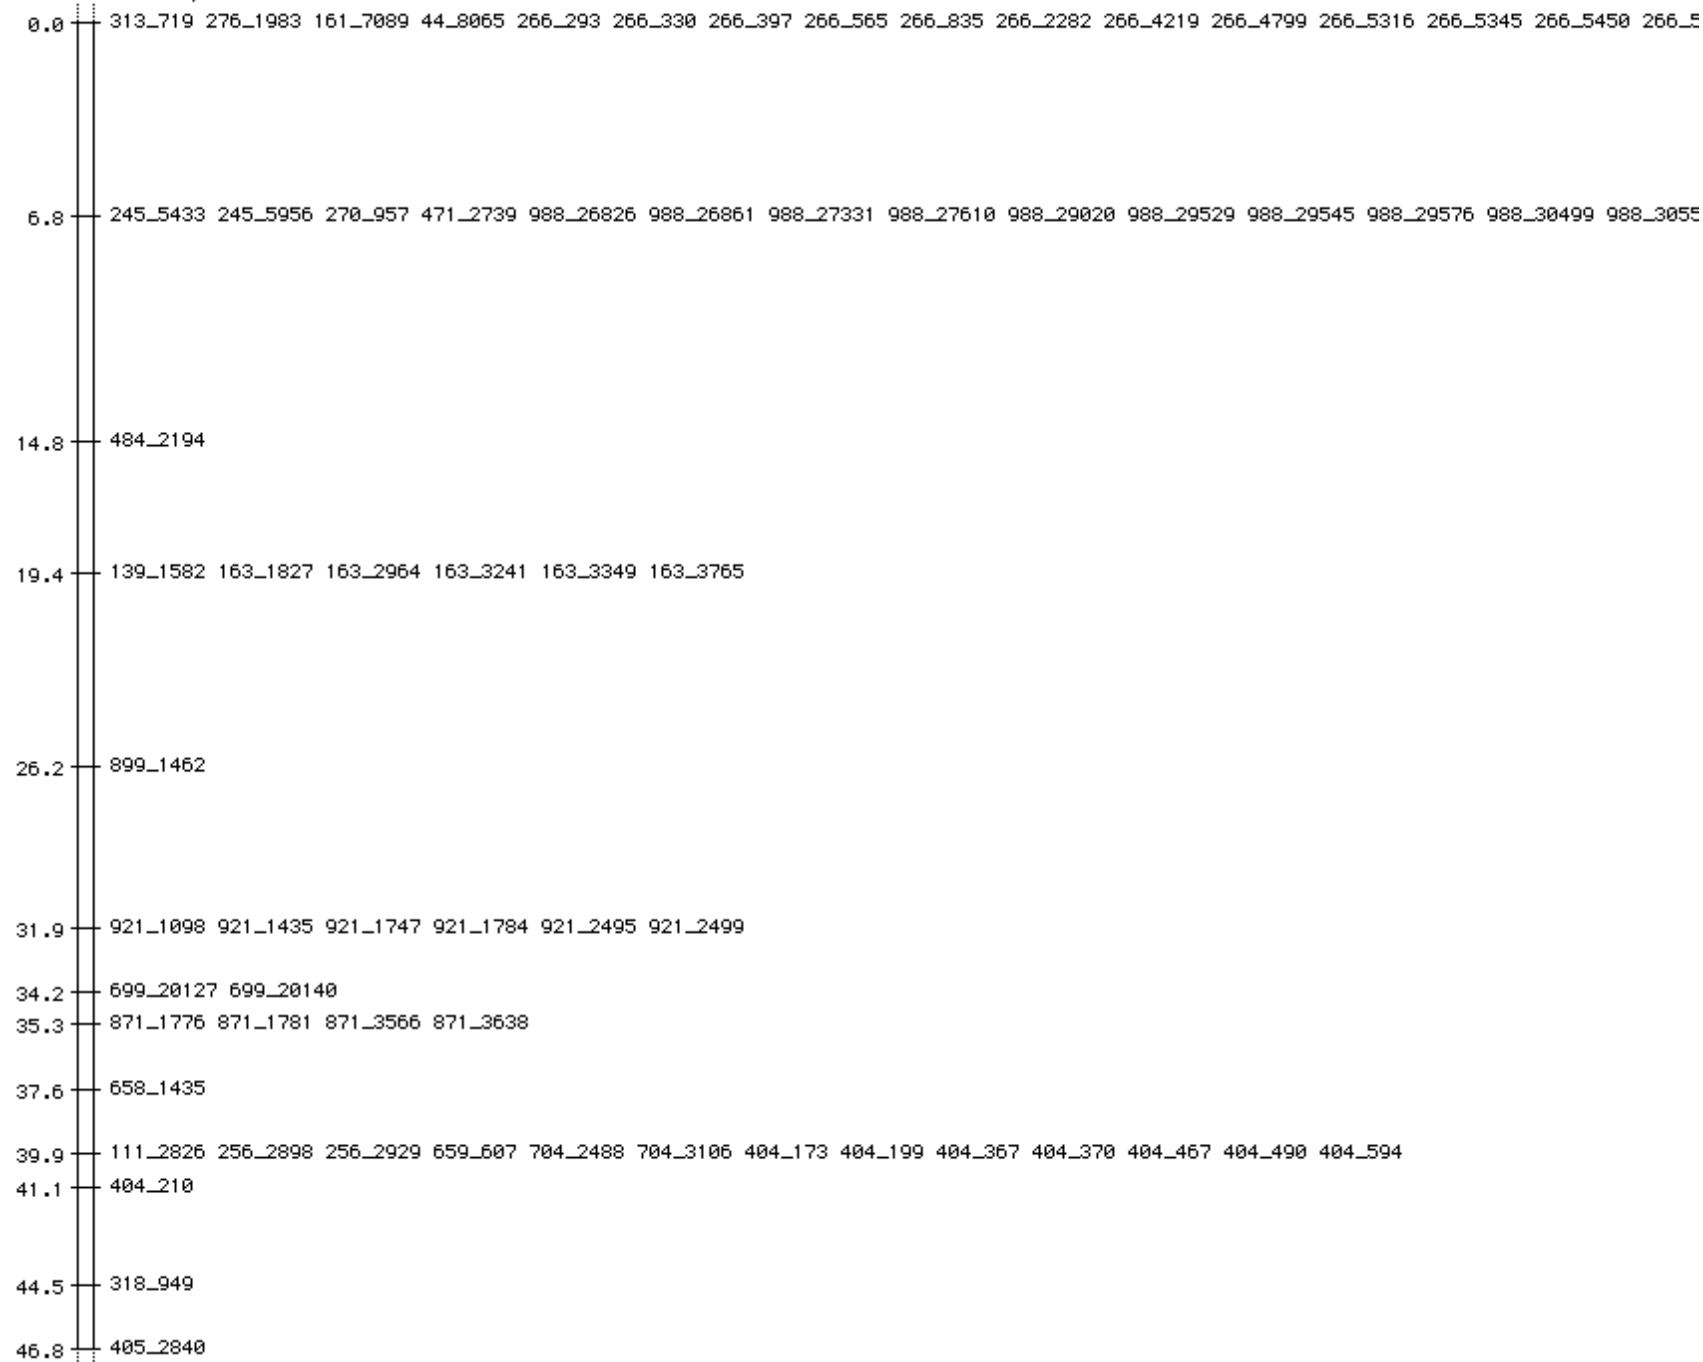



Backcross Stats, 95% Limit

0.0 | 380\_80 380\_563 380\_595 380\_783 380\_1457 380\_1774 380\_2468 380\_2545 380\_2613 380\_2779 380\_3689 380\_3713 380\_3735 380\_3858 380\_3880

1.1 | 855\_680 855\_732 855\_1109 855\_1145 855\_1171 855\_1224 855\_1927 855\_2226 855\_2454 855\_2912 241\_353 241\_628 241\_733 241\_1053 241\_1080

2.3 | 113\_4206



Backcross Stats, 95% Limit

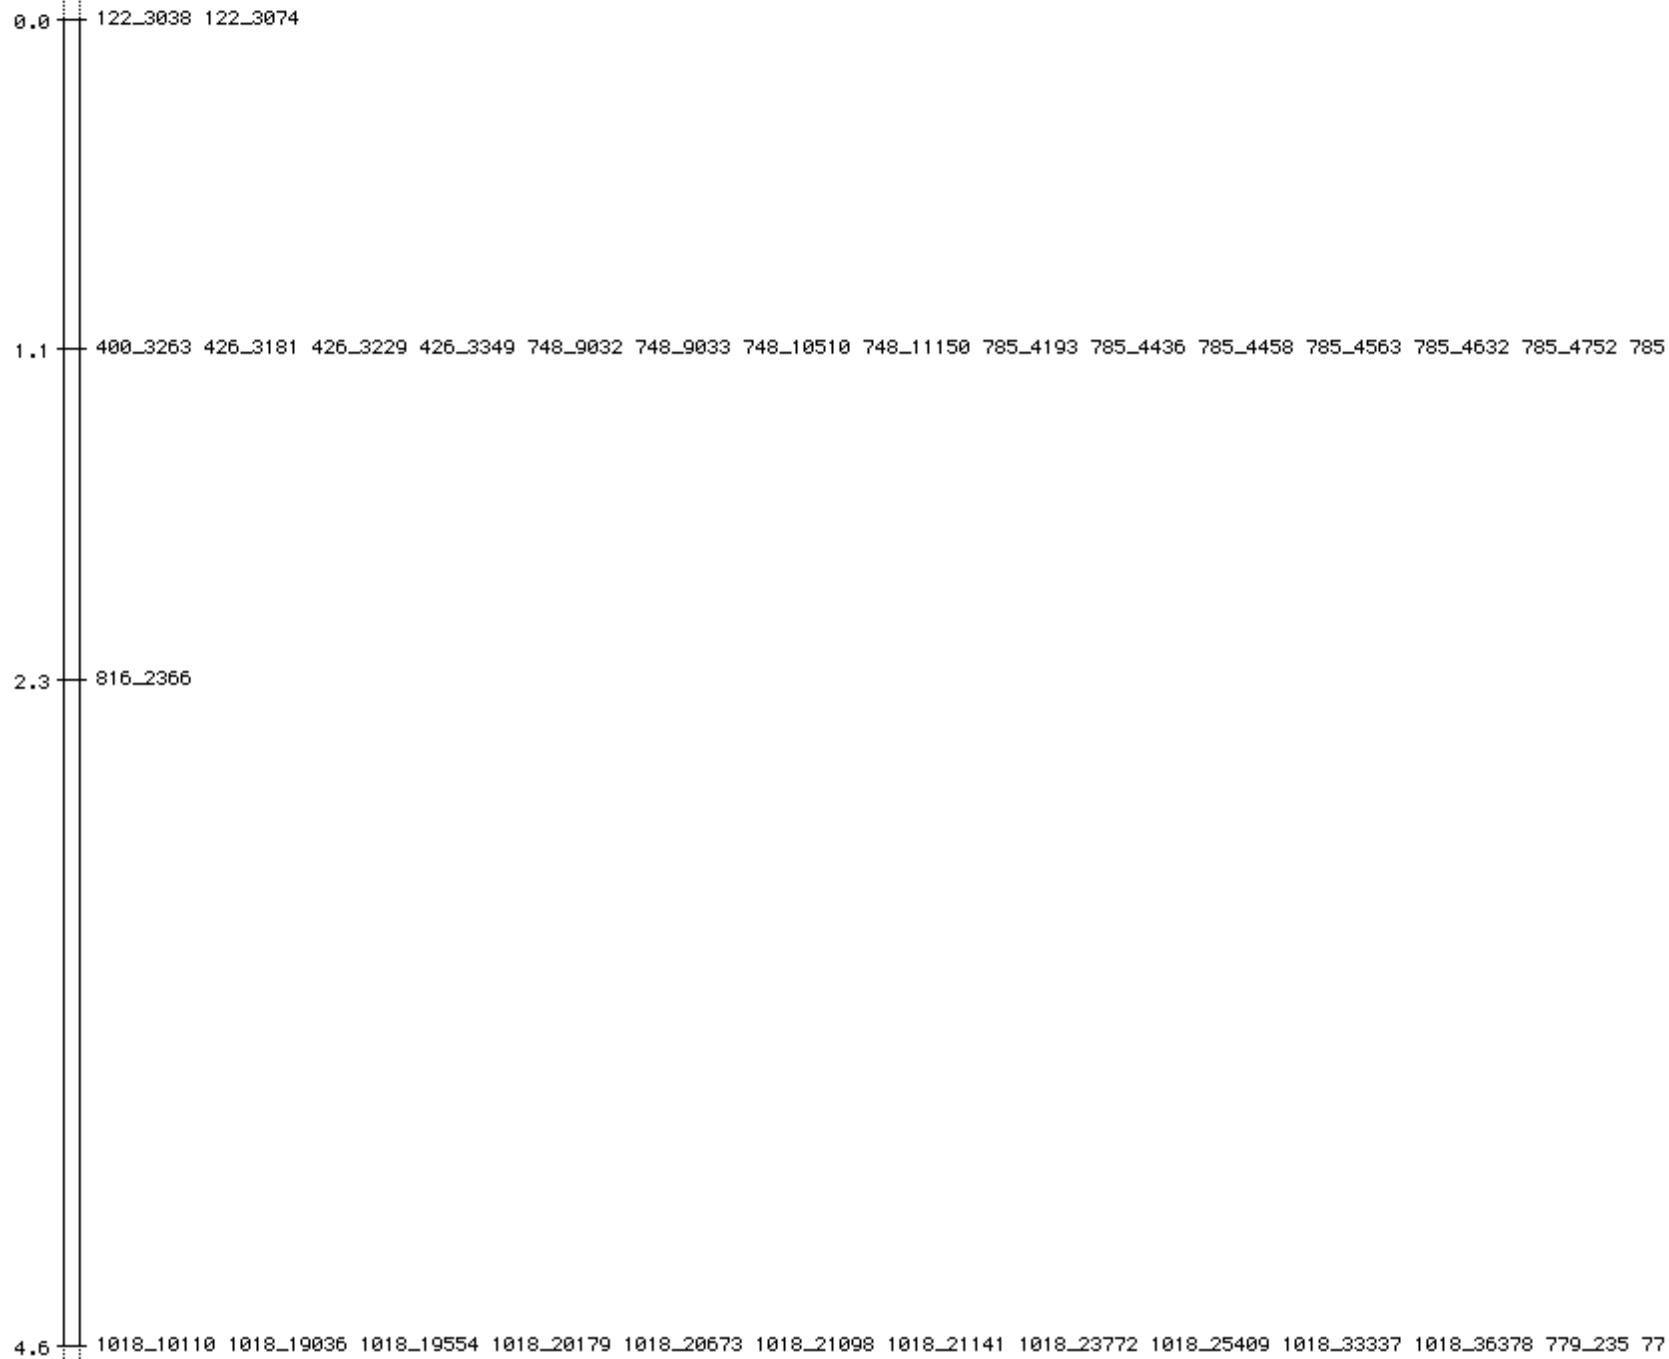

ILLUMINA (ILLUMINA) : E118

Backcross Stats, 95% Limit

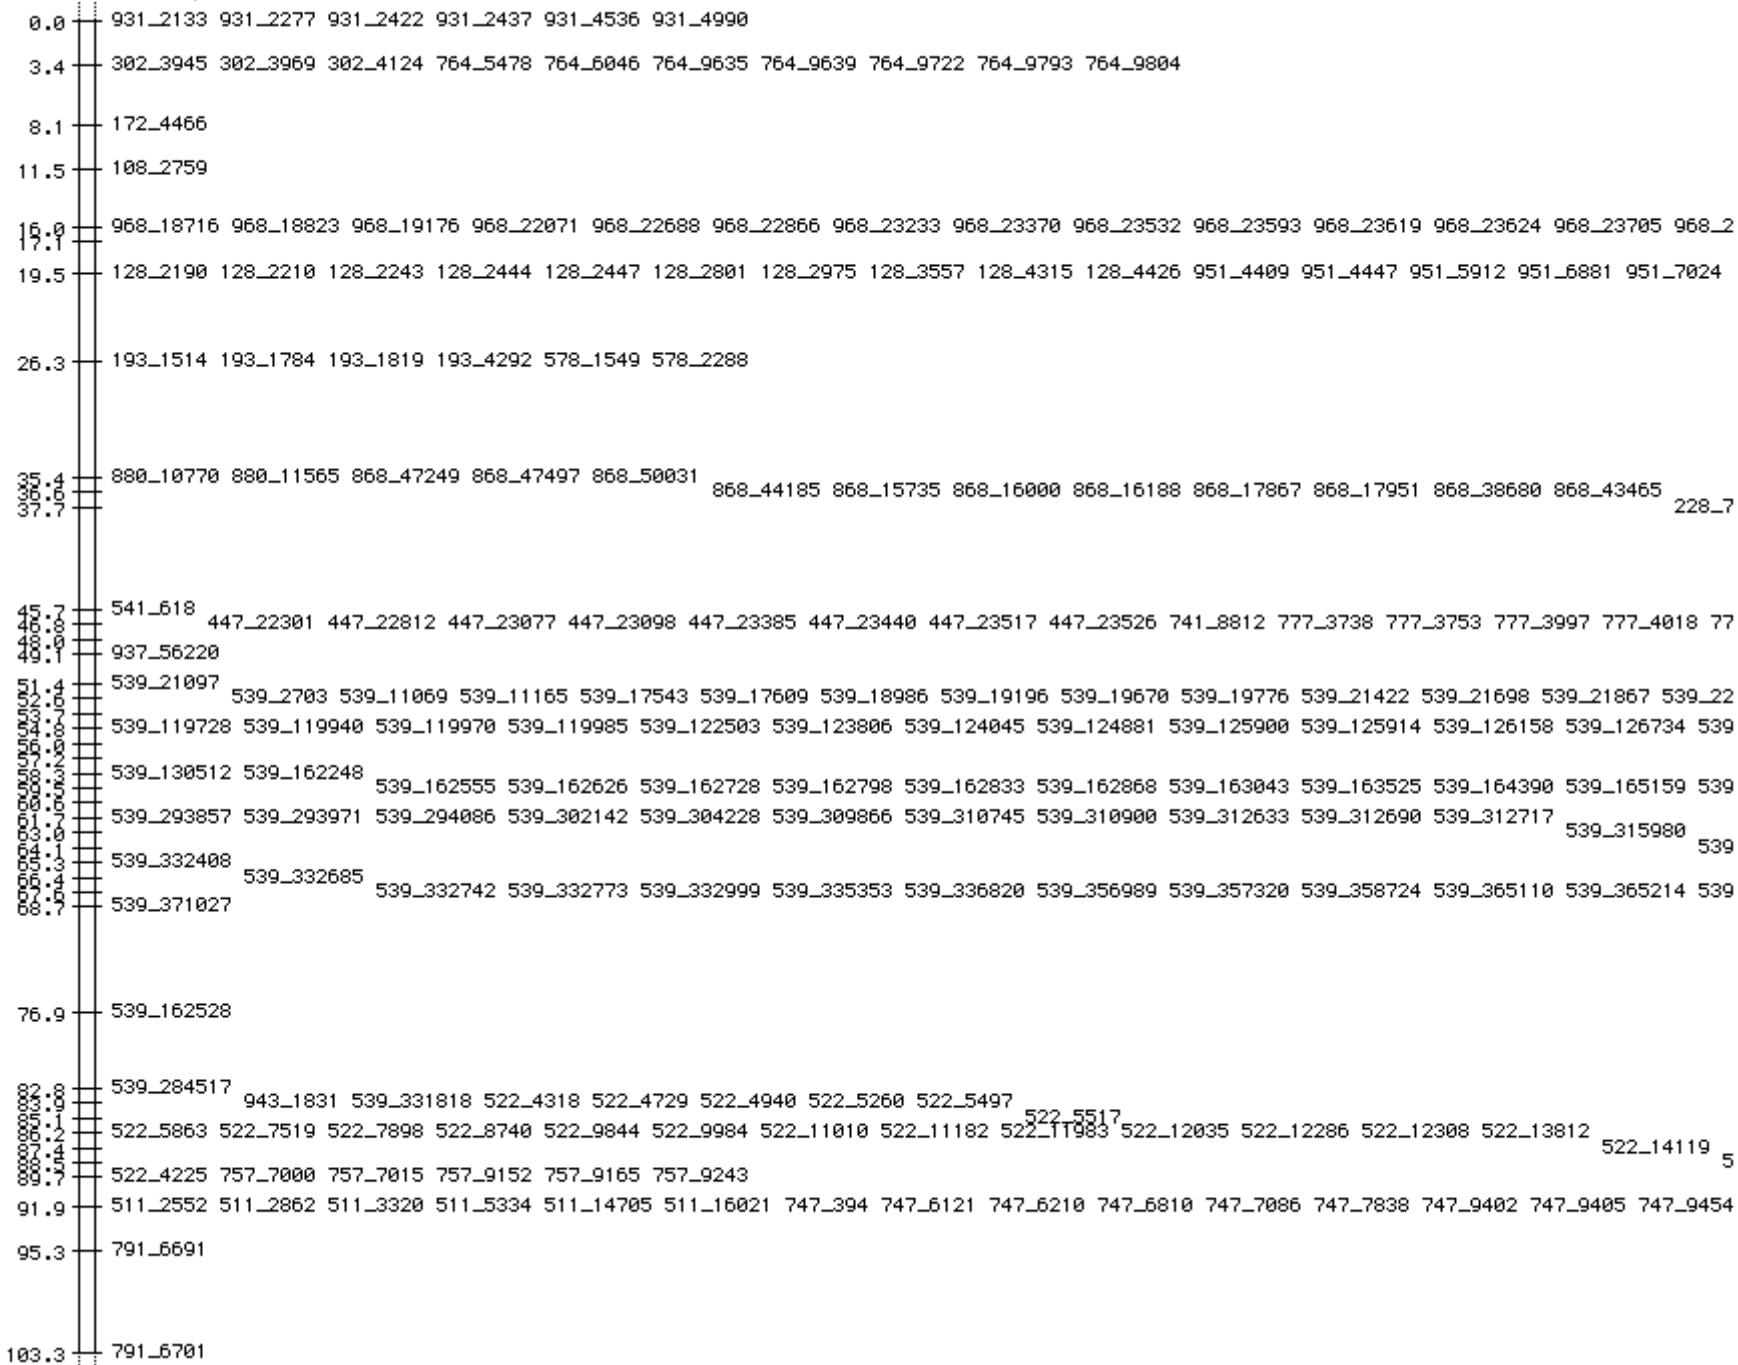

## Backcross Stats, 95% Limit

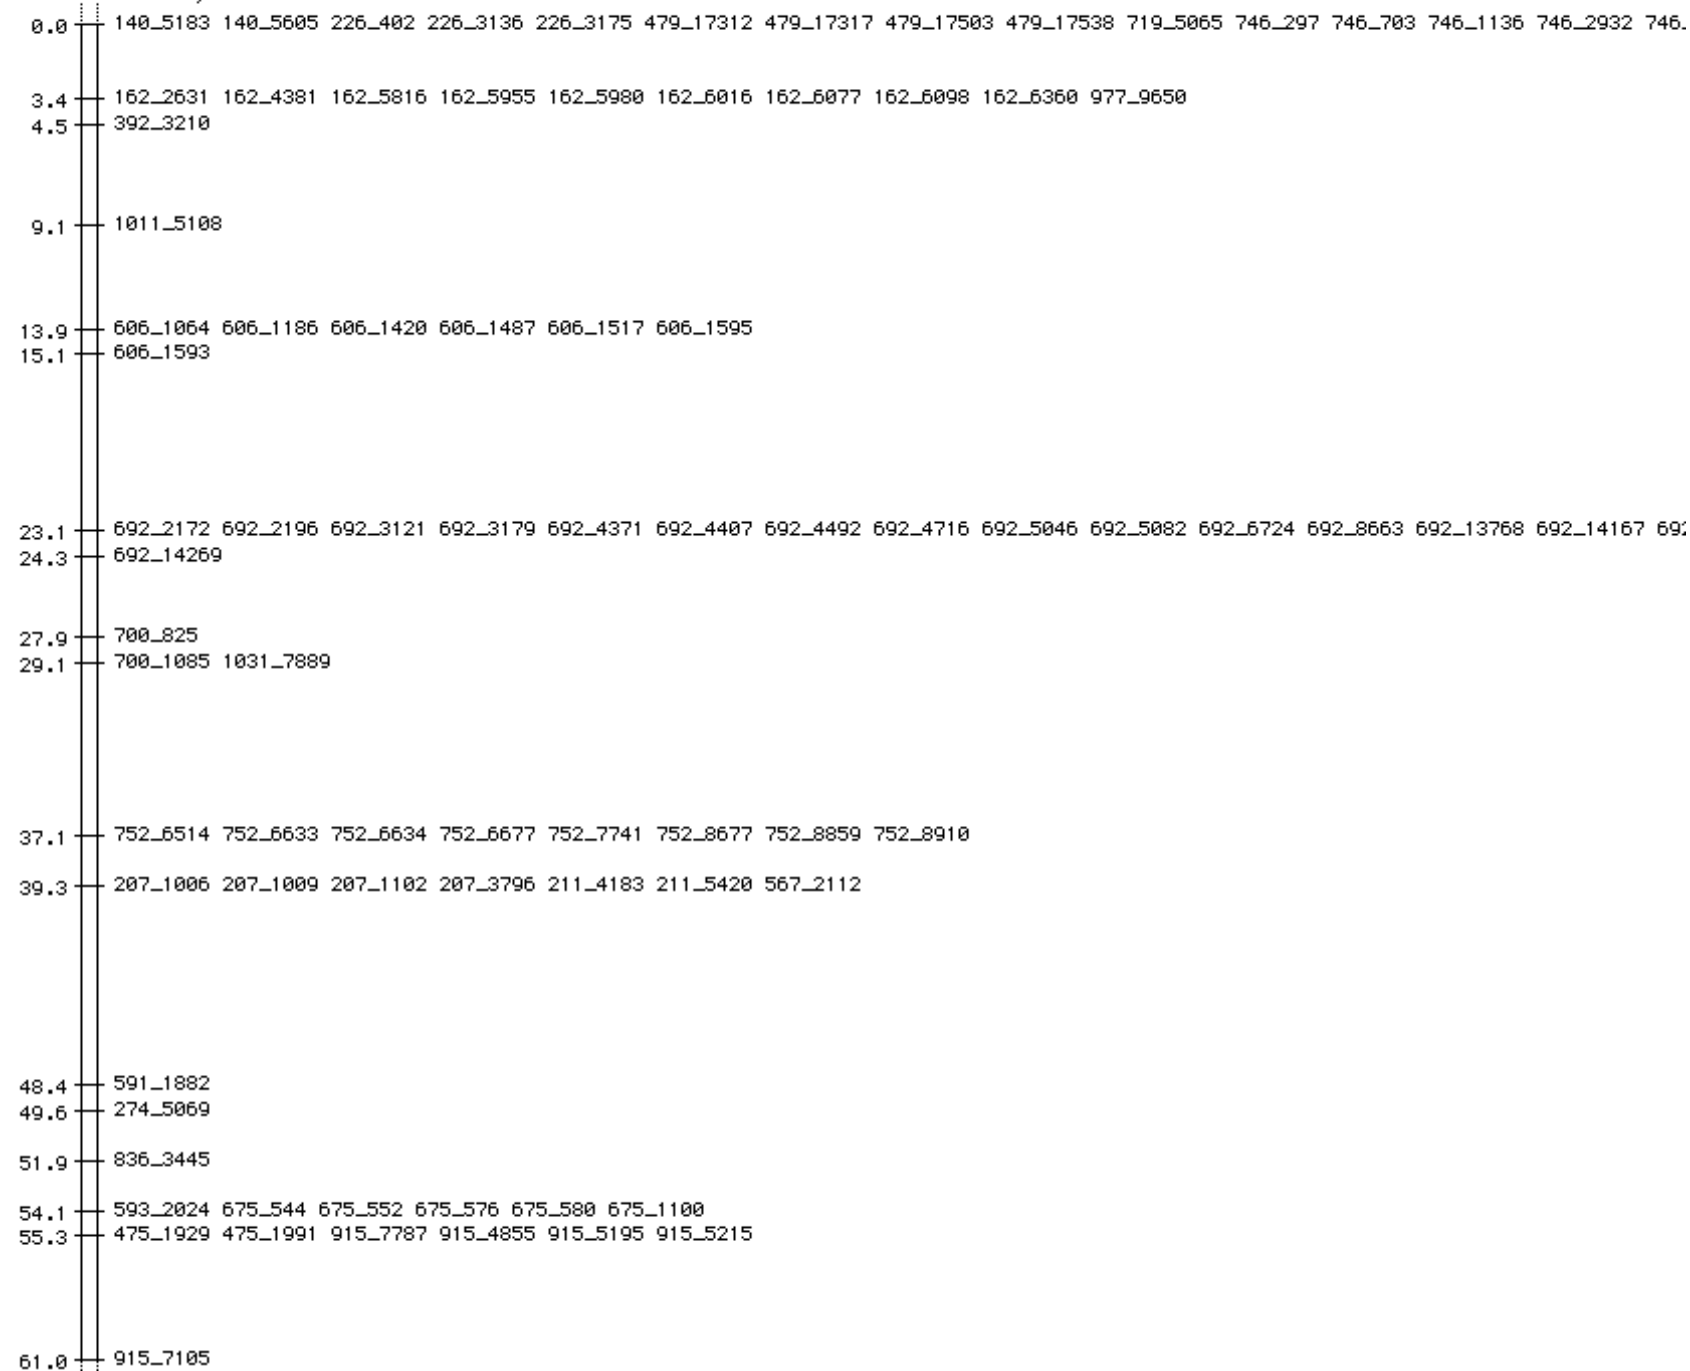

## Backcross Stats, 95% Limit

0.0 337\_5299 459\_1087  
1.1 459\_378 459\_744 459\_781 459\_812  
2.3 953\_295 953\_378 953\_493  
3.4 337\_3724 337\_3726 297\_5183 889\_1407 189\_2043 889\_4122 889\_4148 889\_4491 889\_4516 889\_6964 889\_7017 889\_7182 889\_7618 889\_7692 889\_776  
4.6 189\_5895 189\_6107  
  
9.1 386\_3807  
11.4 382\_2809  
13.7 560\_618  
14.9 395\_584 395\_1876 395\_1879 395\_2480 395\_2503 395\_2558 395\_2608 395\_2791 395\_3115 395\_3253 395\_3329 418\_1810  
18.3 560\_577  
20.6 560\_627  
  
26.3 251\_6001 251\_6002 595\_1675 687\_626 932\_6530 932\_6756  
28.6 841\_11517 841\_725 841\_794 841\_1605 841\_5336 841\_6290 841\_6296 841\_7343 841\_7806 841\_8090 841\_8487 841\_8496 841\_9231 841\_9356 841\_1034  
30.9 841\_10167  
32.1 841\_10182  
33.3 845\_2439 845\_2537 845\_2543 845\_2567 845\_2577 845\_3515 845\_3607 845\_3755 845\_3916 845\_3959 845\_3985 845\_3988 845\_4040 845\_4106 845\_416  
34.4 845\_16783 845\_17477 845\_18502 845\_23795 845\_24400 845\_28450 845\_28477 845\_28623 845\_30123 845\_30129 845\_54416 845\_55789 845\_70429 845  
35.6  
36.7 365\_4472 454\_2460 892\_3982 892\_9961 892\_10262 892\_10372 892\_10499  
  
50.3 516\_2050  
  
54.9 258\_2160  
56.0 258\_2136 258\_2164  
58.3 667\_768 822\_12903 822\_13063  
59.5 775\_1217 775\_1719 775\_1953 775\_1984 775\_2562 775\_4769  
61.8 167\_2880 167\_2910 167\_3002 167\_3361 167\_3396 425\_1018 425\_1021 425\_1044  
62.9 708\_831  
64.1 514\_2420 948\_426 948\_1620  
  
70.9 47\_8509 627\_1186 627\_1380 627\_1534 627\_2139

## Backcross Stats, 95% Limit

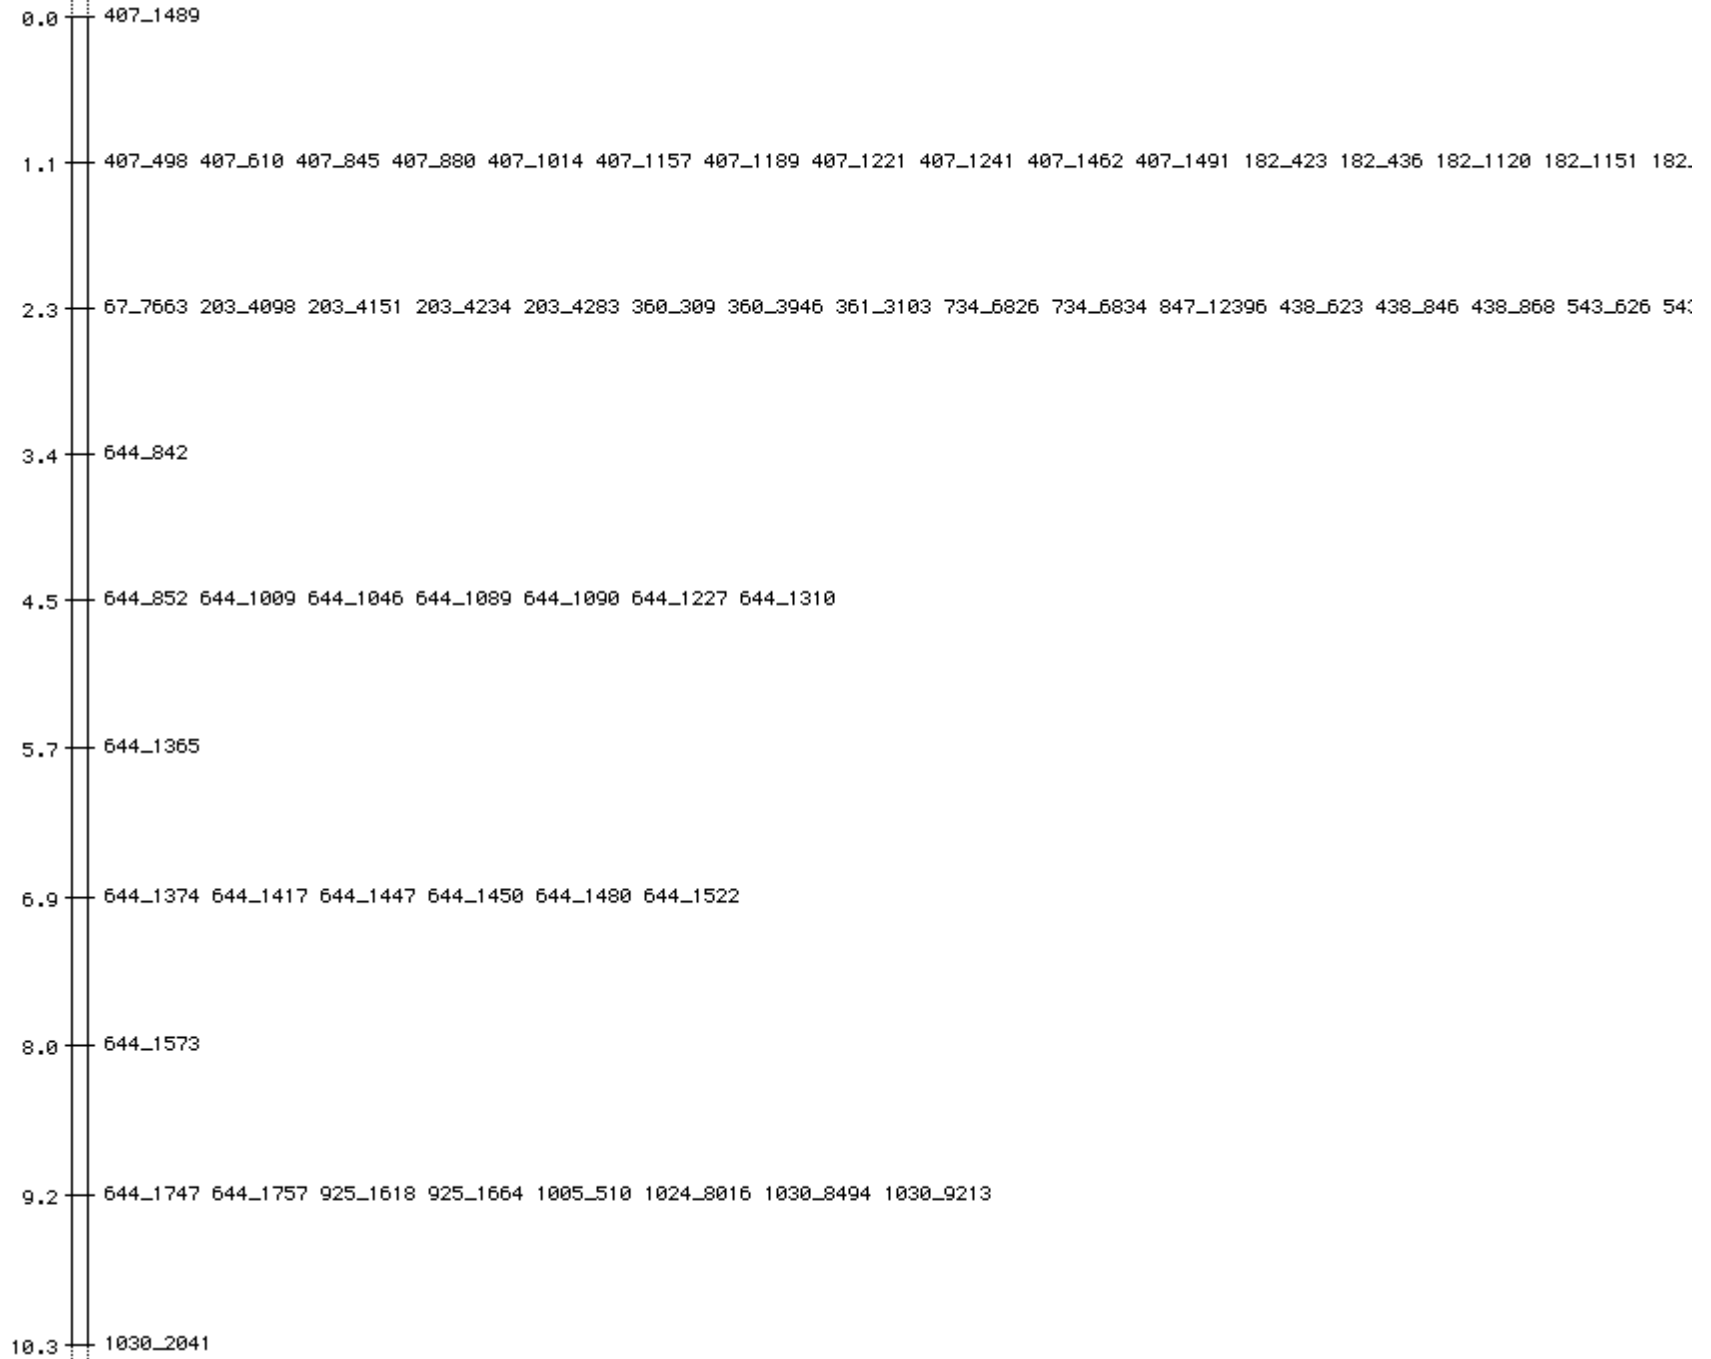

Backcross Stats, 95% Limit

0.0 39\_1430 196\_1334 196\_1598 346\_134 346\_154 346\_165 357\_2613 444\_295 598\_703 603\_405 694\_757 755\_2029 755\_2329 755\_2437 755\_3559 75

1.1 860\_10686 600\_1415 860\_23497

Backcross Stats, 95% Limit

0.0 307\_702 307\_932 630\_491

1.1 521\_384 521\_1531 521\_1583 521\_2437

4.5 259\_359 259\_381 259\_619 259\_1860 259\_1866 259\_1889 259\_2304 259\_2394 259\_3971 259\_4593 259\_4733 259\_5003 259\_5026 259\_5765

Backcross Stats, 95% Limit

0.0 219\_6044

5.7 284\_916 284\_3826



Backcross Stats, 95% Limit

0.0 293\_410 293\_449 293\_868 293\_2151 293\_2332 293\_3925 293\_4354 293\_4369 293\_4723 293\_4788 293\_5341 293\_5411 293\_5651

Backcross Stats, 95% Limit

0.0 257\_4385

12.6 582\_2266 582\_2479

ILLUMINA (ILLUMINA) : E127

Backcross Stats, 95% Limit

0.0 75\_4317 776\_8280 848\_8953

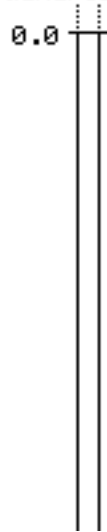

Backcross Stats, 95% Limit

0.0 656\_728 784\_4381 784\_5456

Backcross Stats, 95% Limit

0.0 862\_10038

2.3 821\_9295
